# Supplementary material
Source: publisher figshare collection journal article supplement (https://sage.figshare.com/ndownloader/files/36671659)
Supplement: Supplementary file 1 [file 36671659]

## Sheet: Sheet1
CHIEF COMPLAINT	DIAGNOSIS 1	Age	Gender	Arrival Date	ATTENDANCE SOURCE	TREATMENTS PRIMARY	TREATMENTS SECONDARY	INVESTIGATIONS PRIMARY	INVESTIGATIONS SECONDARY	DISCHARGE DESTINATION
Backache (finding)		28	Male	2017-10-01	Referred by ambulance service (finding)			Plain radiography (procedure)	Plain radiography (procedure)	Discharge to home (procedure)
Backache (finding)		51	Male	2017-10-01	Self-referral to accident and emergency department (procedure)					Discharge to home (procedure)
Backache (finding)		53	Female	2017-10-01	Referred by National Health Service 111 service (finding)			Urinalysis (procedure)		Discharge to home (procedure)
Backache (finding)		54	Female	2017-10-01	Referred by National Health Service 111 service (finding)					Discharge to home (procedure)
Backache (finding)		63	Female	2017-10-01	Self-referral to accident and emergency department (procedure)					Discharge to home (procedure)
Lower back injury (disorder)		21	Male	2017-10-01	Referred by member of Primary Health Care Team (finding)	Cardiac monitor surveillance (regime/therapy)		Blood coagulation panel (procedure)	Complete blood count (procedure)	Patient transfer, to another health care facility (procedure)
Lower back injury (disorder)		26	Male	2017-10-01	Referral by out of hours service (procedure)					Discharge to home (procedure)
Lower back injury (disorder)		26	Female	2017-10-01	Self-referral to accident and emergency department (procedure)					Discharge to home (procedure)
Lower back injury (disorder)		29	Male	2017-10-01	Referred by ambulance service (finding)	Intravenous cannulation (procedure)	Cardiac monitor surveillance (regime/therapy)	Computerized axial tomography (procedure)	C-reactive protein measurement (procedure)	Discharge to home (procedure)
Lower back injury (disorder)		29	Female	2017-10-01	Self-referral to accident and emergency department (procedure)			Plain radiography (procedure)	Plain radiography (procedure)	Discharge to home (procedure)
Lower back injury (disorder)		42	Female	2017-10-01	Self-referral to accident and emergency department (procedure)					Discharge to home (procedure)
Lower back injury (disorder)		46	Male	2017-10-01	Referral by out of hours service (procedure)					Discharge to home (procedure)
Lower back injury (disorder)		57	Male	2017-10-01	Referred by police (finding)			Computerized axial tomography (procedure)	Computerized axial tomography (procedure)	Discharge to home (procedure)
Lower back injury (disorder)		66	Male	2017-10-01	Self-referral to accident and emergency department (procedure)	Administration of medication (procedure)		Plain radiography (procedure)	Plain radiography (procedure)	Discharge to home (procedure)
Lower back injury (disorder)		74	Male	2017-10-01	Self-referral to accident and emergency department (procedure)			Plain radiography (procedure)		Discharge to home (procedure)
Lower back injury (disorder)		84	Female	2017-10-01	Referral by out of hours service (procedure)			Electrocardiographic procedure (procedure)		Discharge to home (procedure)
Backache (finding)		26	Male	2017-10-02	Self-referral to accident and emergency department (procedure)	New medication commenced (finding)		Plain radiography (procedure)	Plain radiography (procedure)	Discharge to home (procedure)
Backache (finding)		27	Male	2017-10-02	Self-referral to accident and emergency department (procedure)	Local anaesthesia (procedure)	New medication commenced (finding)			Discharge to home (procedure)
Backache (finding)		39	Male	2017-10-02	Self-referral to accident and emergency department (procedure)	New medication commenced (finding)		Plain radiography (procedure)	Plain radiography (procedure)	Discharge to home (procedure)
Backache (finding)		51	Female	2017-10-02	Self-referral to accident and emergency department (procedure)	Patient given written advice (situation)	Administration of medication (procedure)			Discharge to home (procedure)
Backache (finding)		57	Female	2017-10-02	Referred by member of Primary Health Care Team (finding)	Administration of medication (procedure)		Magnetic resonance imaging (procedure)	Magnetic resonance imaging (procedure)	Discharge to home (procedure)
Backache (finding)		67	Female	2017-10-02	Referred by member of Primary Health Care Team (finding)	Intravenous cannulation (procedure)		Plain radiography (procedure)	Plain radiography (procedure)	Discharge to ward (procedure)
Backache (finding)		70	Male	2017-10-02	Self-referral to accident and emergency department (procedure)	Patient given written advice (situation)				Discharge to home (procedure)
Backache (finding)		81	Male	2017-10-02	Referred by member of Primary Health Care Team (finding)	Administration of medication (procedure)	Patient given written advice (situation)	Plain radiography (procedure)	Plain radiography (procedure)	Discharge to home (procedure)
Backache (finding)		91	Female	2017-10-02	Referred by member of Primary Health Care Team (finding)	Administration of medication (procedure)		Plain radiography (procedure)	Plain radiography (procedure)	Discharge to home (procedure)
Lower back injury (disorder)		66	Female	2017-10-02	Self-referral to accident and emergency department (procedure)	Patient given written advice (situation)		Plain radiography (procedure)	Plain radiography (procedure)	Discharge to home (procedure)
Lower back injury (disorder)		74	Male	2017-10-02	Referred by ambulance service (finding)	Administration of medication (procedure)	Intravenous antibiotic therapy (procedure)	Plain radiography (procedure)	Plain radiography (procedure)	Discharge to ward (procedure)
Upper back injury (disorder)		38	Male	2017-10-02	Referred by member of Primary Health Care Team (finding)	Patient given written advice (situation)	Administration of medication (procedure)	Plain radiography (procedure)	Plain radiography (procedure)	Discharge to home (procedure)
Backache (finding)		42	Male	2017-10-03	Referred by National Health Service 111 service (finding)					Discharge to home (procedure)
Backache (finding)		76	Male	2017-10-03	Self-referral to accident and emergency department (procedure)	Cardiac monitor surveillance (regime/therapy)		Diagnostic ultrasonography (procedure)		Discharge to home (procedure)
Backache (finding)		80	Male	2017-10-03	Referred by member of Primary Health Care Team (finding)	Patient given written advice (situation)				Discharge to home (procedure)
Backache (finding)	injury of muscle of lower back (disorder)	35	Male	2017-10-03	Referred by National Health Service 111 service (finding)	New medication commenced (finding)	Patient given written advice (situation)			Discharge to home (procedure)
Backache (finding)	pleural effusion (disorder)	58	Male	2017-10-03	Self-referral to accident and emergency department (procedure)	Administration of medication (procedure)		Complete blood count (procedure)	Serum paracetamol measurement (procedure)	Emergency department discharge to emergency department short stay ward (procedure)
Backache (finding)	superficial injury of back (disorder)	17	Male	2017-10-03	Self-referral to accident and emergency department (procedure)	Patient given written advice (situation)				Discharge to home (procedure)
Backache (finding)	ureteric stone (disorder)	73	Female	2017-10-03	Referred by member of Primary Health Care Team (finding)	Infusion of drug or medicament via intravenous route (procedure)	Infusion of drug or medicament via intravenous route (procedure)	Plain radiography (procedure)	Plain radiography (procedure)	Patient transfer, to another health care facility (procedure)
Lower back injury (disorder)	retention of urine (disorder)	60	Female	2017-10-03	Referred by National Health Service 111 service (finding)	Administration of medication (procedure)		Plain radiography (procedure)	Plain radiography (procedure)	Discharge to home (procedure)
Backache (finding)		35	Male	2017-10-04	Referral by out of hours service (procedure)	Administration of medication (procedure)				Discharge to home (procedure)
Lower back injury (disorder)		30	Male	2017-10-04	Self-referral to accident and emergency department (procedure)					Discharge to home (procedure)
Lower back injury (disorder)		61	Male	2017-10-04	Self-referral to accident and emergency department (procedure)	Cardiac monitor surveillance (regime/therapy)		Plain radiography (procedure)	Plain radiography (procedure)	Discharge to home (procedure)
Lower back injury (disorder)	closed fracture of rib (disorder)	63	Male	2017-10-04	Referred by ambulance service (finding)			Plain radiography (procedure)	Plain radiography (procedure)	Discharge to home (procedure)
Lower back injury (disorder)	injury of muscle of lower back (disorder)	45	Female	2017-10-04	Self-referral to accident and emergency department (procedure)	Administration of medication (procedure)				Discharge to home (procedure)
Lower back injury (disorder)	lumbar sprain (disorder)	50	Male	2017-10-04	Self-referral to accident and emergency department (procedure)	New medication commenced (finding)	New medication commenced (finding)			Discharge to home (procedure)
Upper back injury (disorder)	superficial injury of chest (disorder)	28	Male	2017-10-04	Self-referral to accident and emergency department (procedure)	Administration of medication (procedure)		Plain radiography (procedure)	Plain radiography (procedure)	Discharge to home (procedure)
Backache (finding)		43	Female	2017-10-05	Self-referral to accident and emergency department (procedure)	Cardiac monitor surveillance (regime/therapy)				Discharge to home (procedure)
Backache (finding)	injury of muscle of lower back (disorder)	37	Female	2017-10-05	Referred by Her Majesty's Prison Service (finding)	Administration of medication (procedure)				Discharge to home (procedure)
Backache (finding)	lumbar sprain (disorder)	21	Female	2017-10-05	Self-referral to accident and emergency department (procedure)	Patient given written advice (situation)		Urinalysis (procedure)	Human chorionic gonadotropin measurement (procedure)	Discharge to home (procedure)
Backache (finding)	urinary tract infectious disease (disorder)	71	Female	2017-10-05	Referred by ambulance service (finding)	Administration of intravenous fluids (procedure)	Intravenous cannulation (procedure)	Plain radiography (procedure)	Plain radiography (procedure)	Discharge to ward (procedure)
Lower back injury (disorder)	injury of muscle of lower back (disorder)	60	Male	2017-10-05	Referred by ambulance service (finding)	Administration of medication (procedure)				Discharge to home (procedure)
Lower back injury (disorder)	superficial injury of back (disorder)	18	Female	2017-10-05	Referred by National Health Service 111 service (finding)	Administration of medication (procedure)				Discharge to home (procedure)
Lower back injury (disorder)	superficial injury of hip (disorder)	85	Female	2017-10-05	Referred by ambulance service (finding)	Infusion of drug or medicament via intravenous route (procedure)	Intravenous cannulation (procedure)	Plain radiography (procedure)	Plain radiography (procedure)	Discharge to ward (procedure)
Backache (finding)		69	Male	2017-10-06	Self-referral to accident and emergency department (procedure)					Discharge to home (procedure)
Backache (finding)	injury of muscle of lower back (disorder)	44	Female	2017-10-06	Self-referral to accident and emergency department (procedure)	Administration of medication (procedure)		Urinalysis (procedure)		Discharge to home (procedure)
Backache (finding)	lumbar sprain (disorder)	69	Male	2017-10-06	Self-referral to accident and emergency department (procedure)					Discharge to home (procedure)
Lower back injury (disorder)		89	Female	2017-10-06	Referred by ambulance service (finding)	Patient given written advice (situation)				Discharge to home (procedure)
Lower back injury (disorder)	superficial injury of back (disorder)	53	Female	2017-10-06	Referred by member of Primary Health Care Team (finding)	Patient given written advice (situation)	Cardiac monitor surveillance (regime/therapy)	Plain radiography (procedure)	Plain radiography (procedure)	Discharge to home (procedure)
Backache (finding)	injury of muscle of lower back (disorder)	24	Female	2017-10-07	Self-referral to accident and emergency department (procedure)	Patient given written advice (situation)		Urinalysis (procedure)		Discharge to home (procedure)
Backache (finding)	injury of muscle of lower back (disorder)	47	Male	2017-10-07	Referred by National Health Service 111 service (finding)	Local anaesthesia (procedure)	Administration of medication (procedure)			Discharge to home (procedure)
Backache (finding)	lumbar sprain (disorder)	50	Male	2017-10-07	Self-referral to accident and emergency department (procedure)	Patient given written advice (situation)		Blood coagulation panel (procedure)	Complete blood count (procedure)	Discharge to home (procedure)
Backache (finding)	neck sprain (disorder)	29	Male	2017-10-07	Self-referral to accident and emergency department (procedure)	Administration of medication (procedure)	New medication commenced (finding)			Discharge to home (procedure)
Lower back injury (disorder)		74	Female	2017-10-07	Referred by member of Primary Health Care Team (finding)			Computerized axial tomography (procedure)	Computerized axial tomography (procedure)	Discharge to home (procedure)
Lower back injury (disorder)	injury of muscle of lower back (disorder)	57	Female	2017-10-07	Referred by ambulance service (finding)	Administration of medication (procedure)	Patient given written advice (situation)	Plain radiography (procedure)	Plain radiography (procedure)	Discharge to home (procedure)
Lower back injury (disorder)	lumbar sprain (disorder)	79	Female	2017-10-07	Self-referral to accident and emergency department (procedure)	Administration of medication (procedure)	Cardiac monitor surveillance (regime/therapy)	Plain radiography (procedure)	Plain radiography (procedure)	Discharge to ward (procedure)
Upper back injury (disorder)	injury of muscle of lower back (disorder)	29	Female	2017-10-07	Self-referral to accident and emergency department (procedure)	Patient given written advice (situation)				Discharge to ward (procedure)
Backache (finding)		35	Female	2017-10-08	Self-referral to accident and emergency department (procedure)	Administration of medication (procedure)				Discharge to home (procedure)
Backache (finding)	injury of muscle of lower back (disorder)	59	Male	2017-10-08	Referred by National Health Service 111 service (finding)	Administration of medication (procedure)		Blood coagulation panel (procedure)	Complete blood count (procedure)	Discharge to home (procedure)
Backache (finding)	injury of muscle of lower back (disorder)	65	Male	2017-10-08	Referred by National Health Service 111 service (finding)	Local anaesthesia (procedure)		Glucose measurement, blood, test strip (procedure)		Discharge to home (procedure)
Backache (finding)	lumbar sprain (disorder)	53	Female	2017-10-08	Referred by ambulance service (finding)	Administration of medication (procedure)	Cardiac monitor surveillance (regime/therapy)	Urinalysis (procedure)		Discharge to home (procedure)
Lower back injury (disorder)		88	Female	2017-10-08	Self-referral to accident and emergency department (procedure)					Discharge to home (procedure)
Lower back injury (disorder)	lumbar sprain (disorder)	22	Male	2017-10-08	Self-referral to accident and emergency department (procedure)			Urinalysis (procedure)		Discharge to home (procedure)
Lower back injury (disorder)	lumbar sprain (disorder)	32	Male	2017-10-08	Self-referral to accident and emergency department (procedure)	Patient given written advice (situation)	Administration of medication (procedure)			Discharge to home (procedure)
Lower back injury (disorder)	neck sprain (disorder)	24	Female	2017-10-08	Referred by urgent care service (finding)	Patient given written advice (situation)				Discharge to home (procedure)
Lower back injury (disorder)	neck sprain (disorder)	26	Male	2017-10-08	Referred by urgent care service (finding)	Patient given written advice (situation)	New medication commenced (finding)			Discharge to home (procedure)
Lower back injury (disorder)	sciatica (disorder)	40	Male	2017-10-08	Referred by National Health Service 111 service (finding)	Assessment of mobility (procedure)				Discharge to home (procedure)
Upper back injury (disorder)		89	Female	2017-10-08	Self-referral to accident and emergency department (procedure)	Patient given written advice (situation)		Blood coagulation panel (procedure)	Complete blood count (procedure)	Discharge to home (procedure)
Upper back injury (disorder)	closed fracture pelvis, coccyx (disorder)	55	Female	2017-10-08	Self-referral to accident and emergency department (procedure)	Patient given written advice (situation)				Discharge to home (procedure)
Backache (finding)		29	Female	2017-10-09	Self-referral to accident and emergency department (procedure)					Discharge to home (procedure)
Backache (finding)		52	Male	2017-10-09	Self-referral to accident and emergency department (procedure)					Discharge to home (procedure)
Backache (finding)	closed fracture lumbar vertebra (disorder)	68	Male	2017-10-09	Referred by National Health Service 111 service (finding)	Administration of medication (procedure)	Administration of medication (procedure)	Complete blood count (procedure)	Blood coagulation panel (procedure)	Discharge to home (procedure)
Backache (finding)	injury of muscle of lower back (disorder)	23	Female	2017-10-09	Self-referral to accident and emergency department (procedure)	New medication commenced (finding)				Discharge to home (procedure)
Backache (finding)	lower respiratory tract infection (disorder)	91	Female	2017-10-09	Self-referral to accident and emergency department (procedure)	Cardiac monitor surveillance (regime/therapy)	Intravenous cannulation (procedure)	Blood coagulation panel (procedure)	Complete blood count (procedure)	Discharge to ward (procedure)
Backache (finding)	osteoarthritis (disorder)	49	Male	2017-10-09	Self-referral to accident and emergency department (procedure)					Discharge to home (procedure)
Backache (finding)	sciatica (disorder)	55	Female	2017-10-09	Self-referral to accident and emergency department (procedure)	Cardiac monitor surveillance (regime/therapy)	Intravenous cannulation (procedure)	Blood coagulation panel (procedure)	Complete blood count (procedure)	Discharge to ward (procedure)
Backache (finding)	sciatica (disorder)	80	Male	2017-10-09	Referred by member of Primary Health Care Team (finding)	Patient given written advice (situation)				Discharge to home (procedure)
Backache (finding)	superficial injury of back (disorder)	36	Female	2017-10-09	Referred by member of Primary Health Care Team (finding)	Administration of medication (procedure)				Discharge to home (procedure)
Backache (finding)	tonsillitis (disorder)	27	Male	2017-10-09	Referred by National Health Service 111 service (finding)	New medication commenced (finding)				Discharge to home (procedure)
Lower back injury (disorder)		30	Male	2017-10-09	Self-referral to accident and emergency department (procedure)	Administration of medication (procedure)		Plain radiography (procedure)	Plain radiography (procedure)	Discharge to home (procedure)
Lower back injury (disorder)		30	Female	2017-10-09	Self-referral to accident and emergency department (procedure)	Patient given written advice (situation)				Discharge to home (procedure)
Lower back injury (disorder)	closed fracture lumbar vertebra (disorder)	64	Male	2017-10-09	Referred by ambulance service (finding)	Intravenous cannulation (procedure)		Blood coagulation panel (procedure)	Complete blood count (procedure)	Discharge to ward (procedure)
Lower back injury (disorder)	closed fracture of rib (disorder)	83	Male	2017-10-09	Self-referral to accident and emergency department (procedure)	Administration of medication (procedure)	New medication commenced (finding)	Plain radiography (procedure)	Plain radiography (procedure)	Discharge to home (procedure)
Lower back injury (disorder)	neck sprain (disorder)	21	Female	2017-10-09	Referred by National Health Service 111 service (finding)	Administration of medication (procedure)	Patient given written advice (situation)	Plain radiography (procedure)	Plain radiography (procedure)	Discharge to home (procedure)
Lower back injury (disorder)	thoracic back sprain (disorder)	21	Female	2017-10-09	Self-referral to accident and emergency department (procedure)	Administration of medication (procedure)				Discharge to home (procedure)
Backache (finding)		83	Female	2017-10-10	Self-referral to accident and emergency department (procedure)			Plain radiography (procedure)	Plain radiography (procedure)	Discharge to home (procedure)
Backache (finding)	injury of muscle of lower back (disorder)	23	Female	2017-10-10	Self-referral to accident and emergency department (procedure)	Patient given written advice (situation)				Discharge to home (procedure)
Lower back injury (disorder)		25	Male	2017-10-10	Self-referral to accident and emergency department (procedure)	Patient given written advice (situation)		Plain radiography (procedure)	Plain radiography (procedure)	Discharge to home (procedure)
Lower back injury (disorder)	injury of muscle of lower back (disorder)	21	Female	2017-10-10	Self-referral to accident and emergency department (procedure)	Administration of medication (procedure)				Discharge to home (procedure)
Backache (finding)		87	Male	2017-10-11	Referred by ambulance service (finding)	Patient given written advice (situation)				Discharge to home (procedure)
Backache (finding)	injury of muscle of lower back (disorder)	17	Male	2017-10-11	Self-referral to accident and emergency department (procedure)	Cardiac monitor surveillance (regime/therapy)	Intravenous cannulation (procedure)	Plain radiography (procedure)	Plain radiography (procedure)	Discharge to home (procedure)
Backache (finding)	injury of muscle of lower back (disorder)	44	Male	2017-10-11	Referred by member of Primary Health Care Team (finding)					Discharge to home (procedure)
Backache (finding)	injury of muscle of lower back (disorder)	82	Female	2017-10-11	Referred by ambulance service (finding)	New medication commenced (finding)				Discharge to home (procedure)
Backache (finding)	urinary tract infectious disease (disorder)	22	Female	2017-10-11	Referral by out of hours service (procedure)	Cardiac monitor surveillance (regime/therapy)	Patient given written advice (situation)	Plain radiography (procedure)	Plain radiography (procedure)	Discharge to home (procedure)
Lower back injury (disorder)		23	Female	2017-10-11	Referred by member of Primary Health Care Team (finding)			Urinalysis (procedure)		Discharge to home (procedure)
Backache (finding)	injury of muscle of lower back (disorder)	25	Male	2017-10-12	Self-referral to accident and emergency department (procedure)	Patient given written advice (situation)				Discharge to home (procedure)
Backache (finding)	injury of muscle of lower back (disorder)	46	Female	2017-10-12	Referred by National Health Service 111 service (finding)	Administration of medication (procedure)				Discharge to home (procedure)
Backache (finding)	urinary tract infectious disease (disorder)	77	Female	2017-10-12	Self-referral to accident and emergency department (procedure)	New medication commenced (finding)		Urinalysis (procedure)		Discharge to home (procedure)
Injury of cervical region of back (disorder)	superficial injury of knee (disorder)	63	Male	2017-10-12	Self-referral to accident and emergency department (procedure)	Administration of medication (procedure)				Discharge to home (procedure)
Lower back injury (disorder)		18	Male	2017-10-12	Referred by advanced care practitioner (finding)	Patient given written advice (situation)				Discharge to home (procedure)
Lower back injury (disorder)		28	Female	2017-10-12	Self-referral to accident and emergency department (procedure)					Emergency department discharge to ambulatory emergency care service (procedure)
Lower back injury (disorder)		49	Male	2017-10-12	Self-referral to accident and emergency department (procedure)	Patient given written advice (situation)				Emergency department discharge to ambulatory emergency care service (procedure)
Lower back injury (disorder)		58	Male	2017-10-12	Self-referral to accident and emergency department (procedure)	Patient given written advice (situation)				Discharge to home (procedure)
Lower back injury (disorder)	injury of muscle of lower back (disorder)	28	Male	2017-10-12	Self-referral to accident and emergency department (procedure)	Patient given written advice (situation)		Plain radiography (procedure)	Plain radiography (procedure)	Discharge to home (procedure)
Lower back injury (disorder)	injury of muscle of lower back (disorder)	56	Female	2017-10-12	Referred by member of Primary Health Care Team (finding)	Patient given written advice (situation)	Administration of medication (procedure)	Plain radiography (procedure)	Plain radiography (procedure)	Discharge to home (procedure)
Lower back injury (disorder)	injury of muscle of lower back (disorder)	79	Female	2017-10-12	Referred by National Health Service 111 service (finding)			Plain radiography (procedure)	Plain radiography (procedure)	Discharge to home (procedure)
Upper back injury (disorder)	closed fracture of rib (disorder)	61	Male	2017-10-12	Self-referral to accident and emergency department (procedure)	Administration of medication (procedure)		Plain radiography (procedure)	Plain radiography (procedure)	Discharge to home (procedure)
Backache (finding)		86	Male	2017-10-13	Self-referral to accident and emergency department (procedure)	Cardiac monitor surveillance (regime/therapy)		Urinalysis (procedure)		Discharge to home (procedure)
Backache (finding)	calculus of bile duct (disorder)	49	Female	2017-10-13	Referred by National Health Service 111 service (finding)			Blood coagulation panel (procedure)	Complete blood count (procedure)	Discharge to home (procedure)
Backache (finding)	lumbar sprain (disorder)	40	Female	2017-10-13	Self-referral to accident and emergency department (procedure)	Administration of medication (procedure)	Patient given written advice (situation)			Discharge to home (procedure)
Backache (finding)	superficial injury of neck (disorder)	35	Male	2017-10-13	Self-referral to accident and emergency department (procedure)	Patient given written advice (situation)				Discharge to home (procedure)
Injury of cervical region of back (disorder)		40	Male	2017-10-13	Self-referral to accident and emergency department (procedure)	Administration of medication (procedure)	Patient given written advice (situation)	Plain radiography (procedure)	Plain radiography (procedure)	Discharge to home (procedure)
Lower back injury (disorder)		58	Female	2017-10-13	Self-referral to accident and emergency department (procedure)	Administration of medication (procedure)	Patient given written advice (situation)	Plain radiography (procedure)	Plain radiography (procedure)	Discharge to home (procedure)
Lower back injury (disorder)	lumbar sprain (disorder)	47	Male	2017-10-13	Self-referral to accident and emergency department (procedure)	Administration of medication (procedure)				Discharge to home (procedure)
Lower back injury (disorder)	lumbar sprain (disorder)	82	Female	2017-10-13	Self-referral to accident and emergency department (procedure)	Administration of medication (procedure)				Discharge to home (procedure)
Backache (finding)		50	Male	2017-10-14	Self-referral to accident and emergency department (procedure)	Cardiac monitor surveillance (regime/therapy)				Discharge to home (procedure)
Backache (finding)	cauda equina syndrome (disorder)	37	Female	2017-10-14	Referral by out of hours service (procedure)	Patient given written advice (situation)				Patient transfer, to another health care facility (procedure)
Backache (finding)	sciatica (disorder)	50	Female	2017-10-14	Referral by out of hours service (procedure)	Patient given written advice (situation)	New medication commenced (finding)			Discharge to home (procedure)
Backache (finding)	superficial injury of back (disorder)	22	Female	2017-10-14	Self-referral to accident and emergency department (procedure)	Administration of medication (procedure)		Complete blood count (procedure)	Urea and electrolytes (procedure)	Discharge to ward (procedure)
Lower back injury (disorder)		22	Male	2017-10-14	Self-referral to accident and emergency department (procedure)	Patient given written advice (situation)				Discharge to home (procedure)
Backache (finding)		48	Male	2017-10-15	Self-referral to accident and emergency department (procedure)					Discharge to home (procedure)
Backache (finding)	injury of muscle of lower back (disorder)	57	Male	2017-10-15	Self-referral to accident and emergency department (procedure)	Administration of medication (procedure)	Patient given written advice (situation)			Discharge to home (procedure)
Backache (finding)	thoracic back sprain (disorder)	47	Male	2017-10-15	Self-referral to accident and emergency department (procedure)	Administration of medication (procedure)				Discharge to home (procedure)
Backache (finding)	ureteric stone (disorder)	36	Male	2017-10-15	Self-referral to accident and emergency department (procedure)	Intravenous cannulation (procedure)	Intravenous antibiotic therapy (procedure)	Computerized axial tomography (procedure)	Computerized axial tomography (procedure)	Discharge to home (procedure)
Upper back injury (disorder)		62	Female	2017-10-15	Referred by National Health Service 111 service (finding)	New medication commenced (finding)				Discharge to home (procedure)
Upper back injury (disorder)	flail chest (disorder)	80	Female	2017-10-15	Self-referral to accident and emergency department (procedure)			Plain radiography (procedure)	Plain radiography (procedure)	Discharge to ward (procedure)
Backache (finding)	injury of muscle of lower back (disorder)	61	Male	2017-10-16	Self-referral to accident and emergency department (procedure)	Administration of medication (procedure)		Plain radiography (procedure)	Plain radiography (procedure)	Discharge to home (procedure)
Backache (finding)	medication side effects present (finding)	33	Female	2017-10-16	Self-referral to accident and emergency department (procedure)	Administration of medication (procedure)		Complete blood count (procedure)	Urea and electrolytes (procedure)	Discharge to home (procedure)
Backache (finding)	pulmonary embolism (disorder)	27	Female	2017-10-16	Referred by National Health Service 111 service (finding)			Blood coagulation panel (procedure)	Complete blood count (procedure)	Discharge to home (procedure)
Injury of cervical region of back (disorder)	strain of neck muscle (disorder)	21	Female	2017-10-16	Self-referral to accident and emergency department (procedure)	Patient given written advice (situation)	New medication commenced (finding)			Discharge to home (procedure)
Upper back injury (disorder)	superficial injury of back (disorder)	17	Female	2017-10-16	Self-referral to accident and emergency department (procedure)	Administration of medication (procedure)				Discharge to home (procedure)
Backache (finding)		47	Female	2017-10-17	Referred by member of Primary Health Care Team (finding)	Intravenous antibiotic therapy (procedure)		Urinalysis (procedure)		Patient transfer, to another health care facility (procedure)
Backache (finding)	injury of muscle of lower back (disorder)	36	Male	2017-10-17	Self-referral to accident and emergency department (procedure)	New medication commenced (finding)	Patient given written advice (situation)			Discharge to home (procedure)
Backache (finding)	lower respiratory tract infection (disorder)	87	Female	2017-10-17	Referred by National Health Service 111 service (finding)	Patient given written advice (situation)		Blood coagulation panel (procedure)	Complete blood count (procedure)	Discharge to ward (procedure)
Backache (finding)	lumbar sprain (disorder)	74	Female	2017-10-17	Referred by member of Primary Health Care Team (finding)					Discharge to home (procedure)
Backache (finding)	malignant neoplastic disease (disorder)	68	Male	2017-10-17	Referred by National Health Service 111 service (finding)	Intravenous cannulation (procedure)	Patient given written advice (situation)	Blood coagulation panel (procedure)	Complete blood count (procedure)	Discharge to ward (procedure)
Lower back injury (disorder)		32	Male	2017-10-17	Self-referral to accident and emergency department (procedure)	Patient given written advice (situation)				Emergency department discharge to ambulatory emergency care service (procedure)
Lower back injury (disorder)		35	Female	2017-10-17	Referral by out of hours service (procedure)	Patient given written advice (situation)				Discharge to home (procedure)
Lower back injury (disorder)		67	Male	2017-10-17	Referred by National Health Service 111 service (finding)	Patient given written advice (situation)				Discharge to home (procedure)
Lower back injury (disorder)	lumbar sprain (disorder)	86	Female	2017-10-17	Referred by member of Primary Health Care Team (finding)	Patient given written advice (situation)		Plain radiography (procedure)	Plain radiography (procedure)	Discharge to home (procedure)
Upper back injury (disorder)	closed fracture of rib (disorder)	58	Female	2017-10-17	Self-referral to accident and emergency department (procedure)	Intravenous cannulation (procedure)	Cardiac monitor surveillance (regime/therapy)	Plain radiography (procedure)	Urea and electrolytes (procedure)	Discharge to ward (procedure)
Backache (finding)		18	Female	2017-10-18	Referred by National Health Service 111 service (finding)					Discharge to home (procedure)
Backache (finding)	lower respiratory tract infection (disorder)	44	Female	2017-10-18	Self-referral to accident and emergency department (procedure)	Patient given written advice (situation)		Blood coagulation panel (procedure)	Complete blood count (procedure)	Discharge to home (procedure)
Backache (finding)	lumbar sprain (disorder)	64	Female	2017-10-18	Referred by ambulance service (finding)			Complete blood count (procedure)	Blood coagulation panel (procedure)	Discharge to home (procedure)
Backache (finding)	sciatica (disorder)	50	Female	2017-10-18	Referred by ambulance service (finding)	Patient given written advice (situation)	Administration of medication (procedure)	Urinalysis (procedure)	Urinalysis (procedure)	Discharge to home (procedure)
Lower back injury (disorder)		16	Female	2017-10-18	Self-referral to accident and emergency department (procedure)	Patient given written advice (situation)				Discharge to home (procedure)
Lower back injury (disorder)		24	Male	2017-10-18	Referral by out of hours service (procedure)	Administration of medication (procedure)				Discharge to home (procedure)
Lower back injury (disorder)		37	Male	2017-10-18	Self-referral to accident and emergency department (procedure)	Patient given written advice (situation)	Patient given written advice (situation)
Lower back injury (disorder)		44	Female	2017-10-18	Referred by member of Primary Health Care Team (finding)			Plain radiography (procedure)	Plain radiography (procedure)	Discharge to home (procedure)
Lower back injury (disorder)		47	Female	2017-10-18	Self-referral to accident and emergency department (procedure)	Patient given written advice (situation)				Emergency department discharge to ambulatory emergency care service (procedure)
Upper back injury (disorder)	thoracic back sprain (disorder)	27	Female	2017-10-18	Self-referral to accident and emergency department (procedure)					Discharge to home (procedure)
Backache (finding)		25	Female	2017-10-19	Self-referral to accident and emergency department (procedure)	Patient given written advice (situation)				Emergency department discharge to ambulatory emergency care service (procedure)
Backache (finding)		26	Female	2017-10-19	Self-referral to accident and emergency department (procedure)	Patient given written advice (situation)				Discharge to home (procedure)
Backache (finding)	calculus of gallbladder with cholecystitis (disorder)	36	Female	2017-10-19	Self-referral to accident and emergency department (procedure)	Nitrous oxide and oxygen gas analgesia (procedure)	Administration of intravenous fluids (procedure)	Plain radiography (procedure)	Plain radiography (procedure)	Discharge to ward (procedure)
Backache (finding)	injury of muscle of lower back (disorder)	33	Male	2017-10-19	Referred by ambulance service (finding)	Nitrous oxide and oxygen gas analgesia (procedure)	Administration of medication (procedure)			Discharge to home (procedure)
Backache (finding)	injury of muscle of upper back (disorder)	59	Female	2017-10-19	Referred by National Health Service 111 service (finding)	Patient given written advice (situation)		Blood coagulation panel (procedure)	Complete blood count (procedure)	Discharge to home (procedure)
Backache (finding)	lower respiratory tract infection (disorder)	77	Female	2017-10-19	Referred by member of Primary Health Care Team (finding)	Administration of medication (procedure)		Blood coagulation panel (procedure)	Complete blood count (procedure)	Discharge to home (procedure)
Backache (finding)	sciatica (disorder)	25	Male	2017-10-19	Self-referral to accident and emergency department (procedure)	Administration of medication (procedure)		Plain radiography (procedure)	Plain radiography (procedure)	Discharge to home (procedure)
Lower back injury (disorder)		92	Female	2017-10-19	Referred by ambulance service (finding)			Complete blood count (procedure)	Urea and electrolytes (procedure)	Discharge to home (procedure)
Lower back injury (disorder)	injury of muscle of lower back (disorder)	25	Male	2017-10-19	Self-referral to accident and emergency department (procedure)	Patient given written advice (situation)				Discharge to home (procedure)
Lower back injury (disorder)	lumbar sprain (disorder)	26	Female	2017-10-19	Self-referral to accident and emergency department (procedure)	Patient given written advice (situation)		Plain radiography (procedure)	Plain radiography (procedure)	Discharge to home (procedure)
Lower back injury (disorder)	lumbar sprain (disorder)	30	Male	2017-10-19	Self-referral to accident and emergency department (procedure)	Administration of medication (procedure)	New medication commenced (finding)			Discharge to home (procedure)
Lower back injury (disorder)	lumbar sprain (disorder)	46	Male	2017-10-19	Referred by National Health Service 111 service (finding)	Patient given written advice (situation)		Computerized axial tomography (procedure)	Computerized axial tomography (procedure)	Discharge to home (procedure)
Lower back injury (disorder)	superficial injury of back (disorder)	16	Female	2017-10-19	Referred by ambulance service (finding)	Patient given written advice (situation)		Plain radiography (procedure)	Plain radiography (procedure)	Discharge to home (procedure)
Upper back injury (disorder)	traumatic pneumothorax (disorder)	85	Female	2017-10-19	Referred by ambulance service (finding)	Cardiac monitor surveillance (regime/therapy)	Intravenous cannulation (procedure)	Computerized axial tomography (procedure)	Computerized axial tomography (procedure)	Discharge to ward (procedure)
Backache (finding)		16	Female	2017-10-20	Self-referral to accident and emergency department (procedure)	Patient given written advice (situation)		Blood coagulation panel (procedure)	Complete blood count (procedure)	Discharge to home (procedure)
Backache (finding)	lumbar sprain (disorder)	64	Female	2017-10-20	Referred by hospital outpatient department (finding)	Cardiac monitor surveillance (regime/therapy)	Patient given written advice (situation)			Discharge to home (procedure)
Lower back injury (disorder)	injury of muscle of lower back (disorder)	21	Female	2017-10-20	Self-referral to accident and emergency department (procedure)					Discharge to home (procedure)
Lower back injury (disorder)	sciatica (disorder)	43	Female	2017-10-20	Referred by ambulance service (finding)	Intravenous cannulation (procedure)	Administration of medication (procedure)	Immunology profile (procedure)	Blood coagulation panel (procedure)	Discharge to home (procedure)
Lower back injury (disorder)	strain of neck muscle (disorder)	38	Female	2017-10-20	Referred by hospital emergency department (finding)					Discharge to home (procedure)
Lower back injury (disorder)	superficial injury of back (disorder)	16	Female	2017-10-20	Self-referral to accident and emergency department (procedure)	Patient given written advice (situation)				Discharge to home (procedure)
Lower back injury (disorder)	traumatic dislocation of joint of finger (disorder)	42	Female	2017-10-20	Self-referral to accident and emergency department (procedure)	Administration of medication (procedure)	Reduction of dislocation (procedure)	Plain radiography (procedure)	Plain radiography (procedure)	Discharge to home (procedure)
Lower back injury (disorder)	urinary tract infectious disease (disorder)	71	Female	2017-10-20	Self-referral to accident and emergency department (procedure)	New medication commenced (finding)	Administration of medication (procedure)	Plain radiography (procedure)	Plain radiography (procedure)	Discharge to home (procedure)
Backache (finding)	calculus of bile duct (disorder)	53	Female	2017-10-21	Self-referral to accident and emergency department (procedure)	Administration of medication (procedure)	Administration of intravenous fluids (procedure)	Computerized axial tomography (procedure)	Computerized axial tomography (procedure)	Discharge to ward (procedure)
Backache (finding)	sprain of hip (disorder)	72	Male	2017-10-21	Referred by National Health Service 111 service (finding)	New medication commenced (finding)		Computerized axial tomography (procedure)	Computerized axial tomography (procedure)	Discharge to home (procedure)
Lower back injury (disorder)		65	Female	2017-10-21	Referred by ambulance service (finding)			Plain radiography (procedure)	Plain radiography (procedure)	Discharge to home (procedure)
Lower back injury (disorder)		90	Male	2017-10-21	Self-referral to accident and emergency department (procedure)	Patient given written advice (situation)		Blood coagulation panel (procedure)	Complete blood count (procedure)	Discharge to home (procedure)
Lower back injury (disorder)	acute coronary syndrome (disorder)	87	Female	2017-10-21	Referred by urgent care service (finding)	Intravenous cannulation (procedure)	Administration of intravenous fluids (procedure)	Plain radiography (procedure)	Plain radiography (procedure)	Discharge to ward (procedure)
Lower back injury (disorder)	lumbar sprain (disorder)	53	Male	2017-10-21	Self-referral to accident and emergency department (procedure)	Administration of medication (procedure)		Complete blood count (procedure)	Urea and electrolytes (procedure)	Discharge to home (procedure)
Upper back injury (disorder)	lower respiratory tract infection (disorder)	57	Male	2017-10-21	Referred by ambulance service (finding)	Oxygen therapy (procedure)	Intravenous cannulation (procedure)	Blood coagulation panel (procedure)	Complete blood count (procedure)	Discharge to home (procedure)
Upper back injury (disorder)	strain of neck muscle (disorder)	20	Female	2017-10-21	Self-referral to accident and emergency department (procedure)	Administration of medication (procedure)				Discharge to home (procedure)
Upper back injury (disorder)	thoracic back sprain (disorder)	42	Male	2017-10-21	Referred by National Health Service 111 service (finding)	Administration of medication (procedure)		Blood coagulation panel (procedure)	Complete blood count (procedure)	Discharge to home (procedure)
Backache (finding)		27	Female	2017-10-22	Self-referral to accident and emergency department (procedure)	Administration of medication (procedure)		Urinalysis (procedure)	Human chorionic gonadotropin measurement (procedure)	Discharge to home (procedure)
Backache (finding)	lumbar sprain (disorder)	45	Male	2017-10-22	Self-referral to accident and emergency department (procedure)	Patient given written advice (situation)		Urinalysis (procedure)		Discharge to home (procedure)
Backache (finding)	pulmonary embolism (disorder)	39	Male	2017-10-22	Self-referral to accident and emergency department (procedure)			Plain radiography (procedure)	Plain radiography (procedure)	Discharge to ward (procedure)
Backache (finding)	superficial injury of back (disorder)	88	Female	2017-10-22	Self-referral to accident and emergency department (procedure)	Administration of medication (procedure)		Plain radiography (procedure)	Plain radiography (procedure)	Discharge to home (procedure)
Backache (finding)	ureteric stone (disorder)	46	Female	2017-10-22	Referred by urgent care service (finding)	Patient given written advice (situation)		Computerized axial tomography (procedure)	Computerized axial tomography (procedure)	Discharge to home (procedure)
Lower back injury (disorder)		18	Male	2017-10-22	Self-referral to accident and emergency department (procedure)					Discharge to home (procedure)
Lower back injury (disorder)	closed fracture sternum (disorder)	18	Male	2017-10-22	Referred by ambulance service (finding)	Administration of medication (procedure)		Plain radiography (procedure)	Plain radiography (procedure)	Discharge to ward (procedure)
Lower back injury (disorder)	patient walked out (finding)	82	Female	2017-10-22	Referred by ambulance service (finding)	Patient given written advice (situation)				Discharge to home (procedure)
Lower back injury (disorder)	superficial injury of back (disorder)	70	Male	2017-10-22	Self-referral to accident and emergency department (procedure)	Administration of medication (procedure)		Computerized axial tomography (procedure)	Computerized axial tomography (procedure)	Discharge to home (procedure)
Lower back injury (disorder)	superficial injury of pelvic region (disorder)	61	Male	2017-10-22	Self-referral to accident and emergency department (procedure)	Provision of mobility device (procedure)	Patient given written advice (situation)	Plain radiography (procedure)	Plain radiography (procedure)	Discharge to home (procedure)
Upper back injury (disorder)	injury of muscle of upper back (disorder)	40	Male	2017-10-22	Self-referral to accident and emergency department (procedure)	Administration of medication (procedure)				Discharge to home (procedure)
Backache (finding)	cauda equina syndrome (disorder)	47	Male	2017-10-23	Self-referral to accident and emergency department (procedure)	Patient given written advice (situation)	Administration of medication (procedure)	Magnetic resonance imaging (procedure)		Discharge to home (procedure)
Backache (finding)	cauda equina syndrome (disorder)	61	Male	2017-10-23	Self-referral to accident and emergency department (procedure)			Blood coagulation panel (procedure)	Complete blood count (procedure)	Discharge to ward (procedure)
Backache (finding)	injury of muscle of lower back (disorder)	80	Male	2017-10-23	Self-referral to accident and emergency department (procedure)	Patient given written advice (situation)				Discharge to home (procedure)
Backache (finding)	pyelonephritis (disorder)	59	Female	2017-10-23	Self-referral to accident and emergency department (procedure)	Intravenous cannulation (procedure)	Administration of medication (procedure)	Complete blood count (procedure)	Blood coagulation panel (procedure)	Discharge to ward (procedure)
Backache (finding)	urinary tract infectious disease (disorder)	76	Female	2017-10-23	Referred by member of Primary Health Care Team (finding)	Administration of medication (procedure)	New medication commenced (finding)	Plain radiography (procedure)	Plain radiography (procedure)	Discharge to home (procedure)
Lower back injury (disorder)	cellulitis (disorder)	45	Male	2017-10-23	Referred by police (finding)	Application of dressing, minor (procedure)				Discharge to home (procedure)
Lower back injury (disorder)	superficial injury of back (disorder)	18	Female	2017-10-23	Referred by member of Primary Health Care Team (finding)	Patient given written advice (situation)				Discharge to home (procedure)
Lower back injury (disorder)	superficial injury of back (disorder)	89	Female	2017-10-23	Referred by National Health Service 111 service (finding)			Blood coagulation panel (procedure)	Complete blood count (procedure)	Discharge to home (procedure)
Backache (finding)		21	Female	2017-10-24	Referred by member of Primary Health Care Team (finding)	Cardiac monitor surveillance (regime/therapy)		Urinalysis (procedure)		Patient transfer, to another health care facility (procedure)
Backache (finding)		31	Female	2017-10-24	Referred by member of Primary Health Care Team (finding)	Administration of medication (procedure)		Magnetic resonance imaging (procedure)	Magnetic resonance imaging (procedure)	Discharge to home (procedure)
Backache (finding)	injury of muscle of upper back (disorder)	42	Male	2017-10-24	Referred by National Health Service 111 service (finding)	Patient given written advice (situation)		Complete blood count (procedure)	Cardiac enzymes/isoenzymes measurement (procedure)	Discharge to home (procedure)
Backache (finding)	lumbar sprain (disorder)	52	Male	2017-10-24	Referral by out of hours service (procedure)	Patient given written advice (situation)		Plain radiography (procedure)	Plain radiography (procedure)	Discharge to home (procedure)
Backache (finding)	malignant neoplastic disease (disorder)	72	Male	2017-10-24	Self-referral to accident and emergency department (procedure)			Complete blood count (procedure)	Plain radiography (procedure)	Discharge to ward (procedure)
Lower back injury (disorder)	injury of muscle of lower back (disorder)	39	Male	2017-10-24	Self-referral to accident and emergency department (procedure)	Patient given written advice (situation)	Administration of medication (procedure)	Urinalysis (procedure)		Discharge to home (procedure)
Lower back injury (disorder)	superficial injury of chest (disorder)	49	Male	2017-10-24	Self-referral to accident and emergency department (procedure)			Plain radiography (procedure)	Plain radiography (procedure)	Discharge to home (procedure)
Backache (finding)		36	Male	2017-10-25	Self-referral to accident and emergency department (procedure)	Patient given written advice (situation)				Emergency department discharge to ambulatory emergency care service (procedure)
Backache (finding)		39	Female	2017-10-25	Self-referral to accident and emergency department (procedure)					Discharge to home (procedure)
Backache (finding)		51	Male	2017-10-25	Self-referral to accident and emergency department (procedure)	Administration of medication (procedure)		Complete blood count (procedure)	Cardiac enzymes/isoenzymes measurement (procedure)	Discharge to home (procedure)
Backache (finding)	injury of muscle of lower back (disorder)	78	Female	2017-10-25	Self-referral to accident and emergency department (procedure)	Administration of medication (procedure)	Local anaesthesia (procedure)			Discharge to home (procedure)
Backache (finding)	superficial injury of thigh (disorder)	23	Female	2017-10-25	Self-referral to accident and emergency department (procedure)	Patient given written advice (situation)	Administration of medication (procedure)	Blood coagulation panel (procedure)	Complete blood count (procedure)	Discharge to home (procedure)
Lower back injury (disorder)		44	Female	2017-10-25	Self-referral to accident and emergency department (procedure)	Administration of medication (procedure)		Plain radiography (procedure)	Plain radiography (procedure)	Discharge to home (procedure)
Lower back injury (disorder)		56	Female	2017-10-25	Self-referral to accident and emergency department (procedure)	Patient given written advice (situation)				Discharge to home (procedure)
Lower back injury (disorder)	closed fracture pelvis, coccyx (disorder)	44	Female	2017-10-25	Self-referral to accident and emergency department (procedure)	New medication commenced (finding)	Patient given written advice (situation)			Discharge to home (procedure)
Lower back injury (disorder)	injury of muscle of lower back (disorder)	41	Male	2017-10-25	Referred by National Health Service 111 service (finding)	Patient given written advice (situation)				Discharge to home (procedure)
Lower back injury (disorder)	injury of spleen (disorder)	61	Male	2017-10-25	Referred by member of Primary Health Care Team (finding)	Patient given written advice (situation)		Computerized axial tomography (procedure)	Computerized axial tomography (procedure)	Discharge to home (procedure)
Upper back injury (disorder)	neck sprain (disorder)	18	Female	2017-10-25	Referred by hospital emergency department (finding)	Administration of medication (procedure)	Patient given written advice (situation)	Plain radiography (procedure)	Plain radiography (procedure)	Discharge to home (procedure)
Upper back injury (disorder)	superficial injury of elbow (disorder)	58	Female	2017-10-25	Self-referral to accident and emergency department (procedure)	Administration of medication (procedure)		Plain radiography (procedure)	Plain radiography (procedure)	Discharge to home (procedure)
Backache (finding)	injury of muscle of lower back (disorder)	30	Male	2017-10-26	Referred by National Health Service 111 service (finding)	Administration of medication (procedure)				Discharge to home (procedure)
Backache (finding)	injury of muscle of lower back (disorder)	53	Male	2017-10-26	Self-referral to accident and emergency department (procedure)			Urinalysis (procedure)		Discharge to home (procedure)
Lower back injury (disorder)		32	Male	2017-10-26	Self-referral to accident and emergency department (procedure)	Patient given written advice (situation)				Discharge to home (procedure)
Lower back injury (disorder)		36	Male	2017-10-26	Self-referral to accident and emergency department (procedure)					Discharge to home (procedure)
Lower back injury (disorder)		38	Male	2017-10-26	Self-referral to accident and emergency department (procedure)					Emergency department discharge to ambulatory emergency care service (procedure)
Lower back injury (disorder)	cauda equina syndrome (disorder)	70	Female	2017-10-26	Referred by member of Primary Health Care Team (finding)	Administration of medication (procedure)		Blood coagulation panel (procedure)	Complete blood count (procedure)	Discharge to ward (procedure)
Lower back injury (disorder)	neck sprain (disorder)	32	Female	2017-10-26	Referred by ambulance service (finding)	Patient given written advice (situation)				Discharge to home (procedure)
Lower back injury (disorder)	sciatica (disorder)	74	Male	2017-10-26	Self-referral to accident and emergency department (procedure)					Discharge to home (procedure)
Upper back injury (disorder)		85	Female	2017-10-26	Referred by member of Primary Health Care Team (finding)	Patient given written advice (situation)				Discharge to home (procedure)
Backache (finding)		51	Male	2017-10-27	Referral by out of hours service (procedure)	Patient given written advice (situation)		Complete blood count (procedure)	Urea and electrolytes (procedure)	Discharge to ward (procedure)
Backache (finding)	acute coronary syndrome (disorder)	74	Female	2017-10-27	Self-referral to accident and emergency department (procedure)	Intravenous cannulation (procedure)		Complete blood count (procedure)	Cardiac enzymes/isoenzymes measurement (procedure)	Discharge to ward (procedure)
Backache (finding)	injury of muscle of lower back (disorder)	19	Female	2017-10-27	Referred by National Health Service 111 service (finding)	Administration of medication (procedure)				Discharge to home (procedure)
Backache (finding)	injury of muscle of lower back (disorder)	39	Male	2017-10-27	Self-referral to accident and emergency department (procedure)	Patient given written advice (situation)	Administration of medication (procedure)			Discharge to home (procedure)
Backache (finding)	injury of muscle of upper back (disorder)	27	Male	2017-10-27	Self-referral to accident and emergency department (procedure)					Discharge to home (procedure)
Backache (finding)	superficial injury of back (disorder)	56	Female	2017-10-27	Self-referral to accident and emergency department (procedure)	Patient given written advice (situation)				Discharge to home (procedure)
Backache (finding)	superficial injury of foot (disorder)	29	Male	2017-10-27	Self-referral to accident and emergency department (procedure)	Patient given written advice (situation)		Plain radiography (procedure)	Plain radiography (procedure)	Discharge to home (procedure)
Lower back injury (disorder)		26	Male	2017-10-27	Self-referral to accident and emergency department (procedure)	Patient given written advice (situation)				Discharge to home (procedure)
Upper back injury (disorder)	strain of neck muscle (disorder)	61	Female	2017-10-27	Self-referral to accident and emergency department (procedure)			Plain radiography (procedure)	Plain radiography (procedure)	Discharge to home (procedure)
Backache (finding)		38	Male	2017-10-28	Self-referral to accident and emergency department (procedure)	New medication commenced (finding)	Patient given written advice (situation)			Discharge to home (procedure)
Backache (finding)		40	Male	2017-10-28	Self-referral to accident and emergency department (procedure)	Patient given written advice (situation)				Discharge to home (procedure)
Backache (finding)	injury of muscle of lower back (disorder)	41	Female	2017-10-28	Self-referral to accident and emergency department (procedure)	Patient given written advice (situation)	Assessment of mobility (procedure)			Discharge to home (procedure)
Backache (finding)	orchitis and epididymitis (disorder)	89	Male	2017-10-28	Self-referral to accident and emergency department (procedure)					Discharge to home (procedure)
Backache (finding)	pleural effusion (disorder)	87	Female	2017-10-28	Referred by National Health Service 111 service (finding)	Patient given written advice (situation)		Plain radiography (procedure)	Plain radiography (procedure)	Discharge to ward (procedure)
Backache (finding)	ureteric stone (disorder)	33	Male	2017-10-28	Self-referral to accident and emergency department (procedure)	Intravenous cannulation (procedure)	Administration of intravenous fluids (procedure)	Computerized axial tomography (procedure)	Computerized axial tomography (procedure)	Discharge to ward (procedure)
Lower back injury (disorder)	injury of muscle of lower back (disorder)	19	Female	2017-10-28	Self-referral to accident and emergency department (procedure)	Administration of medication (procedure)				Discharge to home (procedure)
Lower back injury (disorder)	injury of muscle of lower back (disorder)	22	Female	2017-10-28	Self-referral to accident and emergency department (procedure)	Patient given written advice (situation)	Administration of medication (procedure)			Discharge to home (procedure)
Lower back injury (disorder)	injury of muscle of lower back (disorder)	73	Female	2017-10-28	Self-referral to accident and emergency department (procedure)	Patient given written advice (situation)				Discharge to home (procedure)
Lower back injury (disorder)	superficial injury of back (disorder)	35	Male	2017-10-28	Self-referral to accident and emergency department (procedure)	Administration of medication (procedure)				Discharge to home (procedure)
Upper back injury (disorder)	pleural effusion (disorder)	37	Male	2017-10-28	Self-referral to accident and emergency department (procedure)	Intravenous cannulation (procedure)	Administration of intravenous fluids (procedure)	Computerized axial tomography (procedure)	Computerized axial tomography (procedure)	Discharge to ward (procedure)
Backache (finding)		52	Male	2017-10-29	Self-referral to accident and emergency department (procedure)					Discharge to home (procedure)
Backache (finding)		68	Female	2017-10-29	Referred by ambulance service (finding)	Patient given written advice (situation)		Plain radiography (procedure)	Plain radiography (procedure)	Patient transfer, to another health care facility (procedure)
Backache (finding)		89	Male	2017-10-29	Self-referral to accident and emergency department (procedure)					Emergency department discharge to ambulatory emergency care service (procedure)
Backache (finding)	lumbar sprain (disorder)	26	Female	2017-10-29	Self-referral to accident and emergency department (procedure)	Administration of medication (procedure)				Discharge to home (procedure)
Backache (finding)	lumbar sprain (disorder)	46	Female	2017-10-29	Self-referral to accident and emergency department (procedure)	Patient given written advice (situation)				Discharge to home (procedure)
Backache (finding)	lumbar sprain (disorder)	89	Male	2017-10-29	Self-referral to accident and emergency department (procedure)	Intravenous cannulation (procedure)	Cardiac monitor surveillance (regime/therapy)	Blood coagulation panel (procedure)	Complete blood count (procedure)	Discharge to home (procedure)
Backache (finding)	sprain of hip (disorder)	83	Male	2017-10-29	Self-referral to accident and emergency department (procedure)	Administration of medication (procedure)		Plain radiography (procedure)	Plain radiography (procedure)	Discharge to home (procedure)
Backache (finding)	traumatic dislocation of joint of lumbar vertebra (disorder)	36	Female	2017-10-29	Referred by National Health Service 111 service (finding)	Patient given written advice (situation)				Discharge to home (procedure)
Lower back injury (disorder)		28	Female	2017-10-29	Self-referral to accident and emergency department (procedure)	Cardiac monitor surveillance (regime/therapy)		Computerized axial tomography (procedure)	Computerized axial tomography (procedure)	Discharge to home (procedure)
Lower back injury (disorder)	injury of muscle of lower back (disorder)	29	Female	2017-10-29	Advised to attend accident and emergency department (situation)	Social assessment (procedure)				Discharge to home (procedure)
Lower back injury (disorder)	injury of muscle of lower back (disorder)	34	Female	2017-10-29	Referred by National Health Service 111 service (finding)	Administration of medication (procedure)		Complete blood count (procedure)	Urea and electrolytes (procedure)	Discharge to home (procedure)
Lower back injury (disorder)	lower respiratory tract infection (disorder)	70	Female	2017-10-29	Self-referral to accident and emergency department (procedure)	Patient given written advice (situation)		Plain radiography (procedure)	Plain radiography (procedure)	Discharge to home (procedure)
Lower back injury (disorder)	lumbar sprain (disorder)	60	Male	2017-10-29	Self-referral to accident and emergency department (procedure)	Patient given written advice (situation)				Discharge to home (procedure)
Lower back injury (disorder)	lumbar sprain (disorder)	69	Female	2017-10-29	Referred by National Health Service 111 service (finding)	Administration of medication (procedure)		Plain radiography (procedure)	Plain radiography (procedure)	Discharge to ward (procedure)
Backache (finding)		26	Female	2017-10-30	Self-referral to accident and emergency department (procedure)					Discharge to home (procedure)
Backache (finding)		44	Female	2017-10-30	Self-referral to accident and emergency department (procedure)					Emergency department discharge to ambulatory emergency care service (procedure)
Backache (finding)		48	Male	2017-10-30	Self-referral to accident and emergency department (procedure)					Emergency department discharge to ambulatory emergency care service (procedure)
Backache (finding)	cauda equina syndrome (disorder)	44	Female	2017-10-30	Referral by out of hours service (procedure)	Patient given written advice (situation)	Administration of medication (procedure)	Magnetic resonance imaging (procedure)	Magnetic resonance imaging (procedure)	Emergency department discharge to ambulatory emergency care service (procedure)
Backache (finding)	cauda equina syndrome (disorder)	44	Female	2017-10-30	Referred by hospital emergency department (finding)	Patient given written advice (situation)				Patient transfer, to another health care facility (procedure)
Backache (finding)	closed fracture thoracic vertebra (disorder)	74	Female	2017-10-30	Referred by National Health Service 111 service (finding)	Administration of medication (procedure)		Blood coagulation panel (procedure)	Complete blood count (procedure)	Discharge to ward (procedure)
Backache (finding)	malignant neoplastic disease (disorder)	87	Male	2017-10-30	Referred by National Health Service 111 service (finding)	Patient given written advice (situation)		Electrocardiographic procedure (procedure)		Discharge to ward (procedure)
Backache (finding)	sprain of hip (disorder)	78	Female	2017-10-30	Referred by member of Primary Health Care Team (finding)	Patient given written advice (situation)	Percutaneous drainage of ascites (procedure)	Plain radiography (procedure)	Plain radiography (procedure)	Discharge to home (procedure)
Lower back injury (disorder)		38	Female	2017-10-30	Referred by National Health Service 111 service (finding)	Patient given written advice (situation)		Plain radiography (procedure)	Plain radiography (procedure)	Discharge to home (procedure)
Lower back injury (disorder)		52	Male	2017-10-30	Self-referral to accident and emergency department (procedure)					Emergency department discharge to ambulatory emergency care service (procedure)
Lower back injury (disorder)	disorder of nervous system (disorder)	50	Female	2017-10-30	Self-referral to accident and emergency department (procedure)	Administration of medication (procedure)	Intravenous cannulation (procedure)	Blood coagulation panel (procedure)	Complete blood count (procedure)	Discharge to home (procedure)
Lower back injury (disorder)	injury of muscle of hand (disorder)	52	Male	2017-10-30	Self-referral to accident and emergency department (procedure)	Patient given written advice (situation)		Plain radiography (procedure)	Plain radiography (procedure)	Discharge to home (procedure)
Lower back injury (disorder)	lumbar sprain (disorder)	85	Female	2017-10-30	Self-referral to accident and emergency department (procedure)	Intravenous cannulation (procedure)	Administration of medication (procedure)	Blood coagulation panel (procedure)	Complete blood count (procedure)	Discharge to residential home (procedure)
Lower back injury (disorder)	superficial injury of back (disorder)	53	Female	2017-10-30	Self-referral to accident and emergency department (procedure)	Patient given written advice (situation)				Discharge to home (procedure)
Lower back injury (disorder)	superficial injury of back (disorder)	54	Female	2017-10-30	Self-referral to accident and emergency department (procedure)	Patient given written advice (situation)		Plain radiography (procedure)	Plain radiography (procedure)	Discharge to home (procedure)
Lower back injury (disorder)	superficial injury of hip (disorder)	87	Female	2017-10-30	Self-referral to accident and emergency department (procedure)	Patient given written advice (situation)				Discharge to home (procedure)
Lower back injury (disorder)	thoracic back sprain (disorder)	22	Female	2017-10-30	Self-referral to accident and emergency department (procedure)	Patient given written advice (situation)				Discharge to home (procedure)
Lower back injury (disorder)	thoracic back sprain (disorder)	54	Female	2017-10-30	Self-referral to accident and emergency department (procedure)					Discharge to home (procedure)
Upper back injury (disorder)	closed fracture thoracic vertebra (disorder)	79	Female	2017-10-30	Referred by National Health Service 111 service (finding)	Cardiac monitor surveillance (regime/therapy)	Intravenous cannulation (procedure)	Computerized axial tomography (procedure)	Computerized axial tomography (procedure)	Discharge to ward (procedure)
Backache (finding)		19	Female	2017-10-31	Self-referral to accident and emergency department (procedure)					Discharge to home (procedure)
Backache (finding)		26	Male	2017-10-31	Self-referral to accident and emergency department (procedure)					Discharge to home (procedure)
Backache (finding)	lower respiratory tract infection (disorder)	68	Male	2017-10-31	Referred by National Health Service 111 service (finding)	Intravenous cannulation (procedure)	Administration of medication (procedure)	Blood coagulation panel (procedure)	Complete blood count (procedure)	Discharge to home (procedure)
Backache (finding)	pyelonephritis (disorder)	27	Female	2017-10-31	Referred by National Health Service 111 service (finding)	Patient given written advice (situation)				Discharge to home (procedure)
Backache (finding)	septicemia (disorder)	34	Female	2017-10-31	Self-referral to accident and emergency department (procedure)	Cardiac monitor surveillance (regime/therapy)	Intravenous cannulation (procedure)	Blood culture (procedure)	Blood coagulation panel (procedure)	Discharge to ward (procedure)
Lower back injury (disorder)	closed fracture pelvis, coccyx (disorder)	38	Female	2017-10-31	Self-referral to accident and emergency department (procedure)	Administration of medication (procedure)				Discharge to home (procedure)
Lower back injury (disorder)	injury of muscle of lower back (disorder)	18	Female	2017-10-31	Self-referral to accident and emergency department (procedure)	Patient given written advice (situation)				Discharge to home (procedure)
Lower back injury (disorder)	patient walked out (finding)	36	Male	2017-10-31	Self-referral to accident and emergency department (procedure)	Patient given written advice (situation)				Emergency department discharge to ambulatory emergency care service (procedure)
Lower back injury (disorder)	thoracic back sprain (disorder)	41	Male	2017-10-31	Self-referral to accident and emergency department (procedure)			Plain radiography (procedure)	Plain radiography (procedure)	Discharge to home (procedure)
Backache (finding)		25	Male	2017-11-01	Self-referral to accident and emergency department (procedure)					Discharge to home (procedure)
Backache (finding)		39	Female	2017-11-01	Self-referral to accident and emergency department (procedure)					Discharge to home (procedure)
Backache (finding)	closed fracture thoracic vertebra (disorder)	75	Female	2017-11-01	Referred by National Health Service 111 service (finding)					Discharge to ward (procedure)
Lower back injury (disorder)		23	Male	2017-11-01	Self-referral to accident and emergency department (procedure)	Administration of medication (procedure)				Discharge to home (procedure)
Lower back injury (disorder)		27	Male	2017-11-01	Self-referral to accident and emergency department (procedure)					Discharge to home (procedure)
Lower back injury (disorder)		29	Male	2017-11-01	Self-referral to accident and emergency department (procedure)					Emergency department discharge to ambulatory emergency care service (procedure)
Lower back injury (disorder)		42	Male	2017-11-01	Self-referral to accident and emergency department (procedure)	Cardiac monitor surveillance (regime/therapy)		Plain radiography (procedure)	Plain radiography (procedure)	Discharge to home (procedure)
Lower back injury (disorder)	sciatica (disorder)	58	Male	2017-11-01	Self-referral to accident and emergency department (procedure)	Administration of medication (procedure)	Intravenous cannulation (procedure)	Plain radiography (procedure)	Plain radiography (procedure)	Discharge to ward (procedure)
Backache (finding)		19	Male	2017-11-02	Self-referral to accident and emergency department (procedure)					Emergency department discharge to ambulatory emergency care service (procedure)
Backache (finding)		19	Female	2017-11-02	Self-referral to accident and emergency department (procedure)					Emergency department discharge to ambulatory emergency care service (procedure)
Backache (finding)		22	Male	2017-11-02	Referred by advanced care practitioner (finding)					Emergency department discharge to ambulatory emergency care service (procedure)
Backache (finding)		29	Female	2017-11-02	Self-referral to accident and emergency department (procedure)					Emergency department discharge to ambulatory emergency care service (procedure)
Backache (finding)		87	Female	2017-11-02	Self-referral to accident and emergency department (procedure)	Patient given written advice (situation)				Emergency department discharge to ambulatory emergency care service (procedure)
Backache (finding)	kidney disease (disorder)	22	Female	2017-11-02	Self-referral to accident and emergency department (procedure)			Urinalysis (procedure)	Human chorionic gonadotropin measurement (procedure)	Discharge to home (procedure)
Backache (finding)	patient walked out (finding)	26	Male	2017-11-02	Self-referral to accident and emergency department (procedure)	Patient given written advice (situation)				Discharge to home (procedure)
Backache (finding)	pyelonephritis (disorder)	25	Female	2017-11-02	Self-referral to accident and emergency department (procedure)	Patient given written advice (situation)		Urinalysis (procedure)	Human chorionic gonadotropin measurement (procedure)	Discharge to home (procedure)
Backache (finding)	sciatica (disorder)	53	Male	2017-11-02	Referred by member of Primary Health Care Team (finding)	Patient given written advice (situation)				Discharge to home (procedure)
Lower back injury (disorder)	chronic obstructive lung disease (disorder)	62	Female	2017-11-02	Self-referral to accident and emergency department (procedure)	Local anaesthesia (procedure)		Plain radiography (procedure)	Plain radiography (procedure)	Discharge to ward (procedure)
Lower back injury (disorder)	injury of muscle of lower back (disorder)	16	Female	2017-11-02	Referred by member of Primary Health Care Team (finding)			Plain radiography (procedure)	Plain radiography (procedure)	Discharge to home (procedure)
Lower back injury (disorder)	injury of muscle of lower back (disorder)	20	Female	2017-11-02	Self-referral to accident and emergency department (procedure)	Patient given written advice (situation)				Discharge to home (procedure)
Lower back injury (disorder)	lumbar sprain (disorder)	47	Female	2017-11-02	Self-referral to accident and emergency department (procedure)	Patient given written advice (situation)				Discharge to home (procedure)
Backache (finding)		27	Female	2017-11-03	Self-referral to accident and emergency department (procedure)					Discharge to home (procedure)
Backache (finding)		35	Female	2017-11-03	Self-referral to accident and emergency department (procedure)					Discharge to home (procedure)
Backache (finding)	cauda equina syndrome (disorder)	73	Male	2017-11-03	Referred by ambulance service (finding)	Patient given written advice (situation)		Blood coagulation panel (procedure)	Complete blood count (procedure)	Patient transfer, to another health care facility (procedure)
Backache (finding)	disorder of nervous system (disorder)	45	Male	2017-11-03	Self-referral to accident and emergency department (procedure)	Patient given written advice (situation)		Computerized axial tomography (procedure)	Computerized axial tomography (procedure)	Discharge to home (procedure)
Backache (finding)	injury of muscle of lower back (disorder)	70	Male	2017-11-03	Referred by ambulance service (finding)	Administration of medication (procedure)	Patient given written advice (situation)	Complete blood count (procedure)	Urea and electrolytes (procedure)	Discharge to home (procedure)
Backache (finding)	patient walked out (finding)	21	Male	2017-11-03	Self-referral to accident and emergency department (procedure)	Patient given written advice (situation)				Discharge to home (procedure)
Backache (finding)	sciatica (disorder)	44	Female	2017-11-03	Self-referral to accident and emergency department (procedure)	Patient given written advice (situation)		Urinalysis (procedure)		Discharge to home (procedure)
Backache (finding)	superficial injury of chest (disorder)	59	Female	2017-11-03	Self-referral to accident and emergency department (procedure)	Administration of medication (procedure)				Discharge to home (procedure)
Backache (finding)	urinary tract infectious disease (disorder)	20	Female	2017-11-03	Self-referral to accident and emergency department (procedure)	Patient given written advice (situation)	New medication commenced (finding)	Plain radiography (procedure)	Plain radiography (procedure)	Discharge to home (procedure)
Lower back injury (disorder)		25	Female	2017-11-03	Self-referral to accident and emergency department (procedure)					Discharge to home (procedure)
Lower back injury (disorder)		46	Female	2017-11-03	Self-referral to accident and emergency department (procedure)	Administration of medication (procedure)		Plain radiography (procedure)	Plain radiography (procedure)	Discharge to home (procedure)
Lower back injury (disorder)		86	Male	2017-11-03	Referred by hospital emergency department (finding)	Cardiac monitor surveillance (regime/therapy)		Blood coagulation panel (procedure)	Complete blood count (procedure)	Discharge to home (procedure)
Lower back injury (disorder)	injury of muscle of lower back (disorder)	26	Female	2017-11-03	Self-referral to accident and emergency department (procedure)	Patient given written advice (situation)	Administration of medication (procedure)			Discharge to home (procedure)
Lower back injury (disorder)	lumbar sprain (disorder)	66	Female	2017-11-03	Self-referral to accident and emergency department (procedure)	Administration of medication (procedure)				Discharge to home (procedure)
Backache (finding)		34	Male	2017-11-04	Self-referral to accident and emergency department (procedure)					Emergency department discharge to ambulatory emergency care service (procedure)
Backache (finding)		47	Female	2017-11-04	Self-referral to accident and emergency department (procedure)	Patient given written advice (situation)				Discharge to home (procedure)
Backache (finding)		56	Female	2017-11-04	Self-referral to accident and emergency department (procedure)					Emergency department discharge to ambulatory emergency care service (procedure)
Backache (finding)		66	Male	2017-11-04	Referred by National Health Service 111 service (finding)			Blood coagulation panel (procedure)	Complete blood count (procedure)	Discharge to home (procedure)
Backache (finding)	lumbar sprain (disorder)	56	Female	2017-11-04	Self-referral to accident and emergency department (procedure)	Cardiac monitor surveillance (regime/therapy)	Administration of medication (procedure)	Plain radiography (procedure)	Plain radiography (procedure)	Discharge to home (procedure)
Backache (finding)	sciatica (disorder)	50	Female	2017-11-04	Referral by out of hours service (procedure)	Patient given written advice (situation)				Discharge to home (procedure)
Backache (finding)	sciatica (disorder)	61	Male	2017-11-04	Referred by National Health Service 111 service (finding)	Administration of medication (procedure)		Blood coagulation panel (procedure)	Complete blood count (procedure)	Discharge to home (procedure)
Backache (finding)	superficial injury of back (disorder)	83	Male	2017-11-04	Self-referral to accident and emergency department (procedure)	Cardiac monitor surveillance (regime/therapy)	Administration of medication (procedure)	Plain radiography (procedure)	Plain radiography (procedure)	Discharge to home (procedure)
Lower back injury (disorder)	superficial injury of finger (disorder)	21	Female	2017-11-04	Self-referral to accident and emergency department (procedure)	Closure of skin wound by tape (procedure)	Patient given written advice (situation)	Plain radiography (procedure)	Plain radiography (procedure)	Discharge to home (procedure)
Backache (finding)		30	Male	2017-11-05	Self-referral to accident and emergency department (procedure)					Emergency department discharge to ambulatory emergency care service (procedure)
Backache (finding)		39	Male	2017-11-05	Self-referral to accident and emergency department (procedure)					Emergency department discharge to ambulatory emergency care service (procedure)
Backache (finding)		39	Male	2017-11-05	Self-referral to accident and emergency department (procedure)	Administration of medication (procedure)	Cardiac monitor surveillance (regime/therapy)	Urinalysis (procedure)	Electrocardiographic procedure (procedure)	Discharge to home (procedure)
Backache (finding)		49	Male	2017-11-05	Self-referral to accident and emergency department (procedure)					Emergency department discharge to ambulatory emergency care service (procedure)
Backache (finding)		67	Female	2017-11-05	Self-referral to accident and emergency department (procedure)					Emergency department discharge to ambulatory emergency care service (procedure)
Backache (finding)	injury of muscle of lower back (disorder)	26	Female	2017-11-05	Self-referral to accident and emergency department (procedure)	Administration of medication (procedure)				Discharge to home (procedure)
Backache (finding)	patient walked out (finding)	25	Male	2017-11-05	Self-referral to accident and emergency department (procedure)	Patient given written advice (situation)				Discharge to home (procedure)
Backache (finding)	sciatica (disorder)	43	Male	2017-11-05	Referred by National Health Service 111 service (finding)	Patient given written advice (situation)	New medication commenced (finding)			Discharge to home (procedure)
Lower back injury (disorder)		24	Female	2017-11-05	Referred by National Health Service 111 service (finding)	Patient given written advice (situation)				Emergency department discharge to ambulatory emergency care service (procedure)
Lower back injury (disorder)		59	Male	2017-11-05	Self-referral to accident and emergency department (procedure)	Administration of medication (procedure)				Discharge to home (procedure)
Lower back injury (disorder)	closed fracture lumbar vertebra (disorder)	89	Male	2017-11-05	Self-referral to accident and emergency department (procedure)	Administration of medication (procedure)				Patient transfer, to another health care facility (procedure)
Lower back injury (disorder)	closed fracture of rib (disorder)	67	Male	2017-11-05	Referred by National Health Service 111 service (finding)	Administration of medication (procedure)		Blood coagulation panel (procedure)	Complete blood count (procedure)	Discharge to home (procedure)
Lower back injury (disorder)	lumbar sprain (disorder)	82	Female	2017-11-05	Self-referral to accident and emergency department (procedure)	Administration of medication (procedure)		Plain radiography (procedure)	Plain radiography (procedure)	Discharge to home (procedure)
Lower back injury (disorder)	sciatica (disorder)	49	Male	2017-11-05	Referred by urgent care service (finding)	Administration of medication (procedure)				Discharge to home (procedure)
Upper back injury (disorder)		90	Female	2017-11-05	Self-referral to accident and emergency department (procedure)			Plain radiography (procedure)	Plain radiography (procedure)	Discharge to home (procedure)
Upper back injury (disorder)	superficial injury of chest (disorder)	24	Female	2017-11-05	Self-referral to accident and emergency department (procedure)	Administration of medication (procedure)				Discharge to home (procedure)
Backache (finding)	injury of muscle of lower back (disorder)	47	Male	2017-11-06	Referred by ambulance service (finding)	Administration of medication (procedure)				Discharge to home (procedure)
Backache (finding)	injury of muscle of lower back (disorder)	50	Female	2017-11-06	Referred by member of Primary Health Care Team (finding)	Administration of medication (procedure)				Discharge to home (procedure)
Backache (finding)	superficial injury of back (disorder)	69	Male	2017-11-06	Referred by National Health Service 111 service (finding)	Patient given written advice (situation)	New medication commenced (finding)			Discharge to home (procedure)
Lower back injury (disorder)		43	Female	2017-11-06	Self-referral to accident and emergency department (procedure)					Discharge to home (procedure)
Lower back injury (disorder)	cauda equina syndrome (disorder)	49	Male	2017-11-06	Self-referral to accident and emergency department (procedure)	Patient given written advice (situation)		Magnetic resonance imaging (procedure)	Magnetic resonance imaging (procedure)	Patient transfer, to another health care facility (procedure)
Lower back injury (disorder)	closed fracture lumbar vertebra (disorder)	30	Male	2017-11-06	Referred by member of Primary Health Care Team (finding)	Administration of medication (procedure)		Computerized axial tomography (procedure)	Computerized axial tomography (procedure)	Discharge to ward (procedure)
Lower back injury (disorder)	closed fracture pelvis, coccyx (disorder)	43	Male	2017-11-06	Self-referral to accident and emergency department (procedure)	Patient given written advice (situation)				Discharge to home (procedure)
Lower back injury (disorder)	injury of muscle of lower back (disorder)	17	Female	2017-11-06	Referred by National Health Service 111 service (finding)	Patient given written advice (situation)		Urinalysis (procedure)		Discharge to home (procedure)
Lower back injury (disorder)	neck sprain (disorder)	21	Male	2017-11-06	Self-referral to accident and emergency department (procedure)	Patient given written advice (situation)				Discharge to home (procedure)
Lower back injury (disorder)	patient walked out (finding)	21	Male	2017-11-06	Self-referral to accident and emergency department (procedure)	Patient given written advice (situation)				Discharge to home (procedure)
Lower back injury (disorder)	superficial injury of neck (disorder)	68	Female	2017-11-06	Referred by urgent care service (finding)	Patient given written advice (situation)	Administration of medication (procedure)			Discharge to home (procedure)
Upper back injury (disorder)	strain of neck muscle (disorder)	18	Female	2017-11-06	Referred by National Health Service 111 service (finding)	Patient given written advice (situation)				Discharge to home (procedure)
Backache (finding)		27	Female	2017-11-07	Self-referral to accident and emergency department (procedure)	Cardiac monitor surveillance (regime/therapy)		Blood coagulation panel (procedure)	Complete blood count (procedure)	Discharge to home (procedure)
Backache (finding)		57	Female	2017-11-07	Referred by member of Primary Health Care Team (finding)	Cardiac monitor surveillance (regime/therapy)	Administration of medication (procedure)	Electrocardiographic procedure (procedure)		Discharge to home (procedure)
Backache (finding)		69	Female	2017-11-07	Referred by National Health Service 111 service (finding)	Cardiac monitor surveillance (regime/therapy)	Intravenous cannulation (procedure)	Blood coagulation panel (procedure)	Complete blood count (procedure)	Discharge to ward (procedure)
Backache (finding)	calculus of bile duct (disorder)	28	Female	2017-11-07	Referred by National Health Service 111 service (finding)	Patient given written advice (situation)		Blood coagulation panel (procedure)	Complete blood count (procedure)	Discharge to home (procedure)
Backache (finding)	infectious gastroenteritis (disorder)	38	Female	2017-11-07	Self-referral to accident and emergency department (procedure)			Complete blood count (procedure)	Urea and electrolytes (procedure)	Discharge to home (procedure)
Backache (finding)	injury of muscle of lower back (disorder)	25	Female	2017-11-07	Self-referral to accident and emergency department (procedure)	New medication commenced (finding)	Administration of medication (procedure)			Discharge to home (procedure)
Backache (finding)	injury of muscle of lower back (disorder)	52	Female	2017-11-07	Referred by member of Primary Health Care Team (finding)	Administration of medication (procedure)	Cardiac monitor surveillance (regime/therapy)	Magnetic resonance imaging (procedure)	Magnetic resonance imaging (procedure)	Discharge to home (procedure)
Backache (finding)	sciatica (disorder)	67	Male	2017-11-07	Self-referral to accident and emergency department (procedure)	Administration of medication (procedure)	New medication commenced (finding)	Blood coagulation panel (procedure)	Complete blood count (procedure)	Discharge to home (procedure)
Lower back injury (disorder)		48	Male	2017-11-07	Self-referral to accident and emergency department (procedure)					Discharge to home (procedure)
Lower back injury (disorder)	rotator cuff syndrome (disorder)	42	Female	2017-11-07	Self-referral to accident and emergency department (procedure)	Patient given written advice (situation)				Discharge to home (procedure)
Upper back injury (disorder)	lumbar sprain (disorder)	21	Female	2017-11-07	Self-referral to accident and emergency department (procedure)	Patient given written advice (situation)		Urinalysis (procedure)		Discharge to home (procedure)
Upper back injury (disorder)	neck sprain (disorder)	19	Female	2017-11-07	Self-referral to accident and emergency department (procedure)	Patient given written advice (situation)				Discharge to home (procedure)
Upper back injury (disorder)	neck sprain (disorder)	32	Male	2017-11-07	Self-referral to accident and emergency department (procedure)	Patient given written advice (situation)				Discharge to home (procedure)
Backache (finding)		46	Male	2017-11-08	Self-referral to accident and emergency department (procedure)					Discharge to home (procedure)
Backache (finding)		56	Female	2017-11-08	Self-referral to accident and emergency department (procedure)					Emergency department discharge to ambulatory emergency care service (procedure)
Backache (finding)	acute coronary syndrome (disorder)	68	Female	2017-11-08	Referred by ambulance service (finding)	Cardiac monitor surveillance (regime/therapy)	Administration of medication (procedure)	Plain radiography (procedure)	Plain radiography (procedure)	Discharge to ward (procedure)
Backache (finding)	injury of muscle of lower back (disorder)	28	Female	2017-11-08	Self-referral to accident and emergency department (procedure)	Patient given written advice (situation)				Discharge to home (procedure)
Backache (finding)	injury of muscle of upper back (disorder)	28	Female	2017-11-08	Referred by National Health Service 111 service (finding)	Patient given written advice (situation)	Administration of medication (procedure)	Plain radiography (procedure)	Plain radiography (procedure)	Discharge to home (procedure)
Lower back injury (disorder)		30	Male	2017-11-08	Self-referral to accident and emergency department (procedure)					Discharge to home (procedure)
Lower back injury (disorder)	closed fracture lumbar vertebra (disorder)	60	Female	2017-11-08	Self-referral to accident and emergency department (procedure)			Plain radiography (procedure)	Plain radiography (procedure)	Discharge to home (procedure)
Lower back injury (disorder)	closed fracture lumbar vertebra (disorder)	88	Female	2017-11-08	Self-referral to accident and emergency department (procedure)	Administration of medication (procedure)	Cardiac monitor surveillance (regime/therapy)	Computerized axial tomography (procedure)	Computerized axial tomography (procedure)	Discharge to ward (procedure)
Lower back injury (disorder)	injury of muscle of lower back (disorder)	36	Male	2017-11-08	Self-referral to accident and emergency department (procedure)	New medication commenced (finding)	Patient given written advice (situation)			Discharge to home (procedure)
Lower back injury (disorder)	injury of muscle of lower back (disorder)	49	Male	2017-11-08	Referral by out of hours service (procedure)			Plain radiography (procedure)	Plain radiography (procedure)	Discharge to home (procedure)
Lower back injury (disorder)	neck sprain (disorder)	28	Male	2017-11-08	Self-referral to accident and emergency department (procedure)	Patient given written advice (situation)				Discharge to home (procedure)
Lower back injury (disorder)	superficial injury of back (disorder)	27	Male	2017-11-08	Self-referral to accident and emergency department (procedure)	Administration of medication (procedure)		Plain radiography (procedure)	Plain radiography (procedure)	Discharge to home (procedure)
Lower back injury (disorder)	superficial injury of chest (disorder)	62	Male	2017-11-08	Self-referral to accident and emergency department (procedure)	Cardiac monitor surveillance (regime/therapy)	Patient given written advice (situation)	Blood coagulation panel (procedure)	Complete blood count (procedure)	Discharge to home (procedure)
Backache (finding)		47	Female	2017-11-09	Self-referral to accident and emergency department (procedure)					Discharge to home (procedure)
Backache (finding)	injury of muscle of lower back (disorder)	68	Male	2017-11-09	Self-referral to accident and emergency department (procedure)	Patient given written advice (situation)	New medication commenced (finding)	Plain radiography (procedure)	Plain radiography (procedure)	Discharge to home (procedure)
Backache (finding)	injury of muscle of upper back (disorder)	43	Male	2017-11-09	Self-referral to accident and emergency department (procedure)	Patient given written advice (situation)				Discharge to home (procedure)
Backache (finding)	lumbar sprain (disorder)	45	Female	2017-11-09	Referred by National Health Service 111 service (finding)	Administration of medication (procedure)	New medication commenced (finding)			Discharge to home (procedure)
Backache (finding)	pyelonephritis (disorder)	48	Female	2017-11-09	Self-referral to accident and emergency department (procedure)	Intravenous antibiotic therapy (procedure)	Cardiac monitor surveillance (regime/therapy)	Plain radiography (procedure)	Plain radiography (procedure)	Discharge to ward (procedure)
Backache (finding)	sciatica (disorder)	40	Female	2017-11-09	Referred by hospital outpatient department (finding)	Patient given written advice (situation)
Backache (finding)	sciatica (disorder)	58	Female	2017-11-09						Discharge to home (procedure)
Backache (finding)	spinal cord injury (disorder)	38	Male	2017-11-09	Referred by hospital outpatient department (finding)	Patient given written advice (situation)				Discharge to home (procedure)
Lower back injury (disorder)		20	Female	2017-11-09	Self-referral to accident and emergency department (procedure)					Discharge to home (procedure)
Lower back injury (disorder)		21	Male	2017-11-09	Self-referral to accident and emergency department (procedure)					Discharge to home (procedure)
Lower back injury (disorder)		21	Male	2017-11-09	Self-referral to accident and emergency department (procedure)					Discharge to home (procedure)
Lower back injury (disorder)	sprain of wrist (disorder)	16	Female	2017-11-09	Self-referral to accident and emergency department (procedure)	Apply Thomas splint traction (procedure)	Patient given written advice (situation)	Plain radiography (procedure)	Plain radiography (procedure)	Discharge to home (procedure)
Lower back injury (disorder)	urinary tract infectious disease (disorder)	87	Female	2017-11-09	Referred by ambulance service (finding)	Intravenous cannulation (procedure)		Computerized axial tomography (procedure)	Computerized axial tomography (procedure)	Discharge to ward (procedure)
Backache (finding)		52	Male	2017-11-10	Referred by ambulance service (finding)	Patient given written advice (situation)				Discharge to home (procedure)
Backache (finding)		77	Female	2017-11-10	Self-referral to accident and emergency department (procedure)	Patient given written advice (situation)		Urinalysis (procedure)		Discharge to home (procedure)
Backache (finding)	injury of muscle of lower back (disorder)	52	Male	2017-11-10	Referred by member of Primary Health Care Team (finding)	Patient given written advice (situation)				Discharge to home (procedure)
Backache (finding)	lower respiratory tract infection (disorder)	71	Male	2017-11-10	Referred by member of Primary Health Care Team (finding)	New medication commenced (finding)		Complete blood count (procedure)	Blood coagulation panel (procedure)	Discharge to home (procedure)
Backache (finding)	urinary tract infectious disease (disorder)	30	Male	2017-11-10	Self-referral to accident and emergency department (procedure)	Administration of medication (procedure)		Plain radiography (procedure)	Plain radiography (procedure)	Discharge to home (procedure)
Lower back injury (disorder)		17	Male	2017-11-10	Self-referral to accident and emergency department (procedure)					Discharge to home (procedure)
Lower back injury (disorder)	injury of muscle of lower back (disorder)	56	Female	2017-11-10	Referred by National Health Service 111 service (finding)	Administration of medication (procedure)				Discharge to home (procedure)
Lower back injury (disorder)	patient walked out (finding)	63	Male	2017-11-10	Self-referral to accident and emergency department (procedure)			Blood coagulation panel (procedure)	Complete blood count (procedure)	Discharge to home (procedure)
Lower back injury (disorder)	superficial injury of back (disorder)	48	Male	2017-11-10	Self-referral to accident and emergency department (procedure)	Patient given written advice (situation)	Administration of medication (procedure)			Discharge to home (procedure)
Backache (finding)		28	Female	2017-11-11	Self-referral to accident and emergency department (procedure)
Backache (finding)		33	Female	2017-11-11	Self-referral to accident and emergency department (procedure)
Backache (finding)		76	Male	2017-11-11	Referred by National Health Service 111 service (finding)	Administration of medication (procedure)		Blood coagulation panel (procedure)	Complete blood count (procedure)	Discharge to home (procedure)
Backache (finding)	injury of muscle of lower back (disorder)	28	Female	2017-11-11	Referred by National Health Service 111 service (finding)			Electrocardiographic procedure (procedure)		Discharge to home (procedure)
Backache (finding)	injury of muscle of lower back (disorder)	35	Male	2017-11-11	Referred by National Health Service 111 service (finding)	Cardiac monitor surveillance (regime/therapy)		Urinalysis (procedure)		Patient transfer, to another health care facility (procedure)
Backache (finding)	sciatica (disorder)	61	Male	2017-11-11	Referred by ambulance service (finding)	Patient given written advice (situation)				Discharge to home (procedure)
Backache (finding)	thoracic back sprain (disorder)	58	Female	2017-11-11	Self-referral to accident and emergency department (procedure)					Discharge to home (procedure)
Lower back injury (disorder)		32	Male	2017-11-11	Self-referral to accident and emergency department (procedure)					Discharge to home (procedure)
Lower back injury (disorder)	lumbar sprain (disorder)	37	Female	2017-11-11	Self-referral to accident and emergency department (procedure)	Administration of medication (procedure)		Urinalysis (procedure)		Discharge to home (procedure)
Lower back injury (disorder)	septicemia (disorder)	53	Male	2017-11-11	Referred by ambulance service (finding)	Intravenous cannulation (procedure)		Plain radiography (procedure)	Plain radiography (procedure)	Emergency department discharge to intensive care unit (procedure)
Lower back injury (disorder)	superficial injury of back (disorder)	54	Female	2017-11-11	Self-referral to accident and emergency department (procedure)	Patient given written advice (situation)		Plain radiography (procedure)	Plain radiography (procedure)	Discharge to home (procedure)
Lower back injury (disorder)	superficial injury of neck (disorder)	56	Female	2017-11-11	Self-referral to accident and emergency department (procedure)					Discharge to home (procedure)
Lower back injury (disorder)	urinary tract infectious disease (disorder)	58	Male	2017-11-11	Referred by National Health Service 111 service (finding)	New medication commenced (finding)	Administration of intravenous fluids (procedure)	Electrocardiographic procedure (procedure)	Glucose measurement, blood, test strip (procedure)	Discharge to home (procedure)
Upper back injury (disorder)	closed fracture thoracic vertebra (disorder)	75	Female	2017-11-11	Referred by National Health Service 111 service (finding)			Complete blood count (procedure)	Plain radiography (procedure)	Discharge to home (procedure)
Backache (finding)		30	Female	2017-11-12	Referred by ambulance service (finding)	Administration of medication (procedure)		Blood coagulation panel (procedure)	Complete blood count (procedure)	Discharge to home (procedure)
Backache (finding)		39	Female	2017-11-12	Self-referral to accident and emergency department (procedure)					Discharge to home (procedure)
Backache (finding)		40	Male	2017-11-12	Self-referral to accident and emergency department (procedure)					Discharge to home (procedure)
Backache (finding)		68	Male	2017-11-12	Self-referral to accident and emergency department (procedure)					Discharge to home (procedure)
Backache (finding)		80	Male	2017-11-12	Self-referral to accident and emergency department (procedure)	Administration of medication (procedure)		Computerized axial tomography (procedure)	Computerized axial tomography (procedure)	Patient transfer, to another health care facility (procedure)
Backache (finding)	kidney disease (disorder)	80	Female	2017-11-12	Referred by National Health Service 111 service (finding)	Administration of medication (procedure)	Intravenous cannulation (procedure)	Blood coagulation panel (procedure)	Complete blood count (procedure)	Discharge to home (procedure)
Backache (finding)	ureteric stone (disorder)	39	Female	2017-11-12	Self-referral to accident and emergency department (procedure)	Patient given written advice (situation)		Complete blood count (procedure)	Plain radiography (procedure)	Discharge to ward (procedure)
Backache (finding)	ureteric stone (disorder)	51	Male	2017-11-12	Referred by ambulance service (finding)	Patient given written advice (situation)	Cardiac monitor surveillance (regime/therapy)	Computerized axial tomography (procedure)	Computerized axial tomography (procedure)	Discharge to ward (procedure)
Backache (finding)	urinary tract infectious disease (disorder)	44	Female	2017-11-12	Self-referral to accident and emergency department (procedure)	Patient given written advice (situation)		Complete blood count (procedure)	Plain radiography (procedure)	Discharge to home (procedure)
Injury of cervical region of back (disorder)	strain of neck muscle (disorder)	17	Male	2017-11-12	Self-referral to accident and emergency department (procedure)	Patient given written advice (situation)				Discharge to home (procedure)
Lower back injury (disorder)		69	Female	2017-11-12	Referred by ambulance service (finding)	Administration of medication (procedure)	Intravenous cannulation (procedure)	Plain radiography (procedure)	Plain radiography (procedure)	Discharge to ward (procedure)
Lower back injury (disorder)		78	Female	2017-11-12	Self-referral to accident and emergency department (procedure)	Cardiac monitor surveillance (regime/therapy)	Administration of medication (procedure)	Plain radiography (procedure)	Plain radiography (procedure)	Discharge to home (procedure)
Lower back injury (disorder)	injury of muscle of lower back (disorder)	34	Female	2017-11-12	Referred by National Health Service 111 service (finding)	New medication commenced (finding)				Discharge to home (procedure)
Lower back injury (disorder)	kidney disease (disorder)	74	Male	2017-11-12	Referred by National Health Service 111 service (finding)	Cardiac monitor surveillance (regime/therapy)		Computerized axial tomography (procedure)	Computerized axial tomography (procedure)	Discharge to home (procedure)
Lower back injury (disorder)	neck sprain (disorder)	27	Female	2017-11-12	Self-referral to accident and emergency department (procedure)	Administration of medication (procedure)	Cardiac monitor surveillance (regime/therapy)			Discharge to home (procedure)
Lower back injury (disorder)	superficial injury of back (disorder)	23	Female	2017-11-12	Self-referral to accident and emergency department (procedure)	Cardiac monitor surveillance (regime/therapy)	New medication commenced (finding)			Discharge to home (procedure)
Lower back injury (disorder)	superficial injury of back (disorder)	45	Female	2017-11-12	Self-referral to accident and emergency department (procedure)	Patient given written advice (situation)		Plain radiography (procedure)	Plain radiography (procedure)	Discharge to home (procedure)
Upper back injury (disorder)		23	Male	2017-11-12	Self-referral to accident and emergency department (procedure)	Patient given written advice (situation)	Administration of medication (procedure)	Plain radiography (procedure)	Plain radiography (procedure)	Discharge to home (procedure)
Upper back injury (disorder)	injury of muscle of upper back (disorder)	31	Male	2017-11-12	Self-referral to accident and emergency department (procedure)	Patient given written advice (situation)				Emergency department discharge to ambulatory emergency care service (procedure)
Upper back injury (disorder)	lumbar sprain (disorder)	54	Female	2017-11-12	Self-referral to accident and emergency department (procedure)	Administration of medication (procedure)				Discharge to home (procedure)
Upper back injury (disorder)	sprain of shoulder (disorder)	23	Male	2017-11-12	Self-referral to accident and emergency department (procedure)	Patient given written advice (situation)		Plain radiography (procedure)	Plain radiography (procedure)	Discharge to home (procedure)
Upper back injury (disorder)	superficial injury of chest (disorder)	53	Female	2017-11-12	Self-referral to accident and emergency department (procedure)	Patient given written advice (situation)		Plain radiography (procedure)	Plain radiography (procedure)	Discharge to home (procedure)
Backache (finding)		30	Male	2017-11-13	Referred by National Health Service 111 service (finding)					Discharge to home (procedure)
Backache (finding)		33	Male	2017-11-13	Self-referral to accident and emergency department (procedure)			Blood coagulation panel (procedure)	Complete blood count (procedure)	Discharge to home (procedure)
Backache (finding)		64	Female	2017-11-13	Self-referral to accident and emergency department (procedure)					Discharge to home (procedure)
Backache (finding)		81	Female	2017-11-13	Referred by member of Primary Health Care Team (finding)	Patient given written advice (situation)		Complete blood count (procedure)	Blood coagulation panel (procedure)	Discharge to home (procedure)
Backache (finding)	cauda equina syndrome (disorder)	24	Female	2017-11-13	Referred by ambulance service (finding)	Cardiac monitor surveillance (regime/therapy)		Serologic test (procedure)		Discharge to home (procedure)
Backache (finding)	closed fracture lumbar vertebra (disorder)	98	Female	2017-11-13	Self-referral to accident and emergency department (procedure)	Patient given written advice (situation)		Plain radiography (procedure)	Plain radiography (procedure)	Discharge to home (procedure)
Backache (finding)	injury of muscle of lower back (disorder)	30	Female	2017-11-13	Self-referral to accident and emergency department (procedure)			Urinalysis (procedure)		Discharge to home (procedure)
Backache (finding)	injury of muscle of lower back (disorder)	35	Female	2017-11-13	Referred by National Health Service 111 service (finding)	Patient given written advice (situation)				Discharge to home (procedure)
Backache (finding)	urinary tract infectious disease (disorder)	79	Male	2017-11-13	Self-referral to accident and emergency department (procedure)	Administration of medication (procedure)	Insertion of catheter into urinary bladder (procedure)	Electrocardiographic procedure (procedure)		Discharge to home (procedure)
Lower back injury (disorder)		18	Male	2017-11-13	Self-referral to accident and emergency department (procedure)	Cardiac monitor surveillance (regime/therapy)	Administration of medication (procedure)	Plain radiography (procedure)	Plain radiography (procedure)	Discharge to home (procedure)
Lower back injury (disorder)	injury of muscle of lower back (disorder)	49	Female	2017-11-13	Self-referral to accident and emergency department (procedure)	Administration of medication (procedure)	New medication commenced (finding)			Discharge to home (procedure)
Lower back injury (disorder)	injury of muscle of lower back (disorder)	88	Male	2017-11-13	Referred by member of Primary Health Care Team (finding)	Patient given written advice (situation)				Discharge to home (procedure)
Lower back injury (disorder)	kidney disease (disorder)	32	Female	2017-11-13	Self-referral to accident and emergency department (procedure)	Patient given written advice (situation)		Blood coagulation panel (procedure)	Complete blood count (procedure)	Discharge to home (procedure)
Upper back injury (disorder)	injury of muscle of upper back (disorder)	31	Male	2017-11-13	Self-referral to accident and emergency department (procedure)	Patient given written advice (situation)		Computerized axial tomography (procedure)	Computerized axial tomography (procedure)	Discharge to home (procedure)
Backache (finding)		25	Female	2017-11-14	Self-referral to accident and emergency department (procedure)	Patient given written advice (situation)		Blood coagulation panel (procedure)	Complete blood count (procedure)	Discharge to home (procedure)
Backache (finding)		46	Male	2017-11-14	Self-referral to accident and emergency department (procedure)					Discharge to home (procedure)
Backache (finding)		89	Male	2017-11-14	Self-referral to accident and emergency department (procedure)	Intravenous cannulation (procedure)	Administration of intravenous fluids (procedure)	Plain radiography (procedure)	Plain radiography (procedure)	Discharge to home (procedure)
Backache (finding)	injury of muscle of lower back (disorder)	31	Male	2017-11-14	Referred by National Health Service 111 service (finding)	Cardiac monitor surveillance (regime/therapy)		Plain radiography (procedure)	Plain radiography (procedure)	Discharge to home (procedure)
Backache (finding)	injury of muscle of lower back (disorder)	69	Female	2017-11-14	Self-referral to accident and emergency department (procedure)	Patient given written advice (situation)		Cardiac enzymes/isoenzymes measurement (procedure)	Complete blood count (procedure)	Discharge to home (procedure)
Backache (finding)	injury of muscle of lower back (disorder)	81	Female	2017-11-14	Self-referral to accident and emergency department (procedure)	Administration of medication (procedure)				Discharge to home (procedure)
Lower back injury (disorder)		59	Male	2017-11-14	Self-referral to accident and emergency department (procedure)					Discharge to home (procedure)
Lower back injury (disorder)		68	Female	2017-11-14	Self-referral to accident and emergency department (procedure)					Discharge to home (procedure)
Lower back injury (disorder)	closed fracture pelvis, coccyx (disorder)	21	Female	2017-11-14	Self-referral to accident and emergency department (procedure)			Plain radiography (procedure)	Plain radiography (procedure)	Discharge to home (procedure)
Lower back injury (disorder)	injury of muscle of lower back (disorder)	36	Female	2017-11-14	Self-referral to accident and emergency department (procedure)	Cardiac monitor surveillance (regime/therapy)				Discharge to home (procedure)
Lower back injury (disorder)	injury of muscle of upper back (disorder)	56	Female	2017-11-14	Self-referral to accident and emergency department (procedure)	Cardiac monitor surveillance (regime/therapy)				Discharge to home (procedure)
Lower back injury (disorder)	sciatica (disorder)	42	Male	2017-11-14	Self-referral to accident and emergency department (procedure)	Administration of medication (procedure)				Discharge to home (procedure)
Lower back injury (disorder)	superficial injury of back (disorder)	73	Female	2017-11-14	Referred by member of Primary Health Care Team (finding)	Patient given written advice (situation)		Plain radiography (procedure)	Plain radiography (procedure)	Discharge to home (procedure)
Upper back injury (disorder)	subarachnoid hemorrhage (disorder)	38	Female	2017-11-14	Referred by hospital emergency department (finding)	Patient given written advice (situation)				Discharge to ward (procedure)
Upper back injury (disorder)	superficial injury of chest (disorder)	35	Male	2017-11-14	Self-referral to accident and emergency department (procedure)	Patient given written advice (situation)		Plain radiography (procedure)	Plain radiography (procedure)	Discharge to home (procedure)
Backache (finding)		34	Male	2017-11-15	Self-referral to accident and emergency department (procedure)					Discharge to home (procedure)
Backache (finding)		45	Male	2017-11-15	Self-referral to accident and emergency department (procedure)					Discharge to home (procedure)
Backache (finding)		45	Male	2017-11-15	Referral by out of hours service (procedure)	Patient given written advice (situation)		Blood coagulation panel (procedure)	Complete blood count (procedure)	Discharge to home (procedure)
Backache (finding)		47	Male	2017-11-15	Self-referral to accident and emergency department (procedure)					Discharge to home (procedure)
Backache (finding)	injury of muscle of lower back (disorder)	47	Male	2017-11-15	Self-referral to accident and emergency department (procedure)	Administration of medication (procedure)				Discharge to home (procedure)
Backache (finding)	sciatica (disorder)	27	Female	2017-11-15	Self-referral to accident and emergency department (procedure)	Cardiac monitor surveillance (regime/therapy)	Administration of medication (procedure)			Discharge to home (procedure)
Lower back injury (disorder)		38	Male	2017-11-15	Self-referral to accident and emergency department (procedure)					Discharge to home (procedure)
Lower back injury (disorder)		84	Female	2017-11-15	Referred by National Health Service 111 service (finding)	Patient given written advice (situation)				Discharge to home (procedure)
Lower back injury (disorder)	lumbar sprain (disorder)	42	Female	2017-11-15	Self-referral to accident and emergency department (procedure)	Patient given written advice (situation)	Administration of medication (procedure)			Discharge to home (procedure)
Lower back injury (disorder)	superficial injury of back (disorder)	17	Female	2017-11-15	Self-referral to accident and emergency department (procedure)	Patient given written advice (situation)	New medication commenced (finding)	Urinalysis (procedure)		Discharge to home (procedure)
Lower back injury (disorder)	superficial injury of back (disorder)	21	Male	2017-11-15	Self-referral to accident and emergency department (procedure)	Patient given written advice (situation)	New medication commenced (finding)			Discharge to home (procedure)
Upper back injury (disorder)	traumatic brain injury with no loss of consciousness (disorder)	77	Male	2017-11-15	Referred by National Health Service 111 service (finding)	Patient given written advice (situation)		Blood coagulation panel (procedure)	Complete blood count (procedure)	Discharge to home (procedure)
Upper back injury (disorder)	ureteric stone (disorder)	39	Female	2017-11-15	Self-referral to accident and emergency department (procedure)	Patient given written advice (situation)		Computerized axial tomography (procedure)	Computerized axial tomography (procedure)	Discharge to ward (procedure)
Backache (finding)		21	Male	2017-11-16	Referred by National Health Service 111 service (finding)	Patient given written advice (situation)				Discharge to home (procedure)
Backache (finding)		61	Female	2017-11-16	Self-referral to accident and emergency department (procedure)					Discharge to home (procedure)
Backache (finding)	superficial injury of back (disorder)	61	Male	2017-11-16	Self-referral to accident and emergency department (procedure)	Patient given written advice (situation)		Plain radiography (procedure)	Plain radiography (procedure)	Discharge to home (procedure)
Lower back injury (disorder)		24	Male	2017-11-16	Referred by National Health Service 111 service (finding)					Emergency department discharge to ambulatory emergency care service (procedure)
Lower back injury (disorder)		27	Male	2017-11-16	Self-referral to accident and emergency department (procedure)	Patient given written advice (situation)	New medication commenced (finding)			Discharge to home (procedure)
Upper back injury (disorder)		90	Female	2017-11-16	Referred by hospital emergency department (finding)	Cardiac monitor surveillance (regime/therapy)		Plain radiography (procedure)	Plain radiography (procedure)	Discharge to ward (procedure)
Upper back injury (disorder)	lumbar sprain (disorder)	32	Male	2017-11-16	Self-referral to accident and emergency department (procedure)	Administration of medication (procedure)		Computerized axial tomography (procedure)	Computerized axial tomography (procedure)	Discharge to home (procedure)
Backache (finding)		43	Female	2017-11-17	Referred by member of Primary Health Care Team (finding)	Administration of medication (procedure)		Magnetic resonance imaging (procedure)	Magnetic resonance imaging (procedure)	Patient transfer, to another health care facility (procedure)
Backache (finding)		51	Male	2017-11-17	Self-referral to accident and emergency department (procedure)					Emergency department discharge to ambulatory emergency care service (procedure)
Backache (finding)		65	Male	2017-11-17	Self-referral to accident and emergency department (procedure)	Administration of medication (procedure)	Cardiac monitor surveillance (regime/therapy)	Complete blood count (procedure)	Complete blood count (procedure)	Patient transfer, to another health care facility (procedure)
Backache (finding)	disorder of nervous system (disorder)	30	Female	2017-11-17	Referred by member of Primary Health Care Team (finding)	Patient given written advice (situation)		Magnetic resonance imaging (procedure)	Magnetic resonance imaging (procedure)	Patient transfer, to another health care facility (procedure)
Backache (finding)	injury of muscle of upper back (disorder)	95	Female	2017-11-17	Self-referral to accident and emergency department (procedure)	New medication commenced (finding)		Complete blood count (procedure)	Plain radiography (procedure)	Discharge to home (procedure)
Backache (finding)	patient walked out (finding)	92	Female	2017-11-17	Self-referral to accident and emergency department (procedure)	Patient given written advice (situation)				Discharge to home (procedure)
Backache (finding)	superficial injury of back (disorder)	67	Female	2017-11-17	Self-referral to accident and emergency department (procedure)	Cardiac monitor surveillance (regime/therapy)	Patient given written advice (situation)	Plain radiography (procedure)	Plain radiography (procedure)	Discharge to home (procedure)
Backache (finding)	ureteric stone (disorder)	60	Male	2017-11-17	Self-referral to accident and emergency department (procedure)	Patient given written advice (situation)		Computerized axial tomography (procedure)	Computerized axial tomography (procedure)	Discharge to home (procedure)
Lower back injury (disorder)		40	Male	2017-11-17	Self-referral to accident and emergency department (procedure)					Discharge to home (procedure)
Lower back injury (disorder)		47	Male	2017-11-17	Self-referral to accident and emergency department (procedure)					Discharge to home (procedure)
Lower back injury (disorder)	injury of muscle of lower back (disorder)	89	Female	2017-11-17	Self-referral to accident and emergency department (procedure)	Administration of medication (procedure)		Complete blood count (procedure)	Blood coagulation panel (procedure)	Discharge to home (procedure)
Lower back injury (disorder)	superficial injury of back (disorder)	47	Female	2017-11-17	Self-referral to accident and emergency department (procedure)	Patient given written advice (situation)				Discharge to home (procedure)
Lower back injury (disorder)	traumatic brain injury with no loss of consciousness (disorder)	22	Male	2017-11-17	Self-referral to accident and emergency department (procedure)	Patient given written advice (situation)		Plain radiography (procedure)	Plain radiography (procedure)	Discharge to home (procedure)
Backache (finding)		17	Female	2017-11-18	Self-referral to accident and emergency department (procedure)					Discharge to home (procedure)
Backache (finding)		23	Male	2017-11-18	Self-referral to accident and emergency department (procedure)					Discharge to home (procedure)
Backache (finding)		50	Female	2017-11-18	Referred by National Health Service 111 service (finding)	Patient given written advice (situation)		Blood coagulation panel (procedure)	Complete blood count (procedure)	Discharge to home (procedure)
Backache (finding)		70	Female	2017-11-18	Referred by ambulance service (finding)	Administration of medication (procedure)	Intravenous cannulation (procedure)	Plain radiography (procedure)	Plain radiography (procedure)	Discharge to home (procedure)
Backache (finding)	patient walked out (finding)	59	Female	2017-11-18	Referred by National Health Service 111 service (finding)					Discharge to home (procedure)
Lower back injury (disorder)	blood coagulation disorder (disorder)	69	Female	2017-11-18	Referred by ambulance service (finding)	Intravenous cannulation (procedure)				Discharge to ward (procedure)
Lower back injury (disorder)	superficial injury of back (disorder)	20	Female	2017-11-18	Self-referral to accident and emergency department (procedure)	Patient given written advice (situation)	New medication commenced (finding)			Discharge to home (procedure)
Backache (finding)		18	Female	2017-11-19	Referred by advanced care practitioner (finding)	New medication commenced (finding)	Patient given written advice (situation)	Urinalysis (procedure)		Discharge to home (procedure)
Backache (finding)	injury of muscle of lower back (disorder)	81	Female	2017-11-19	Referred by urgent care service (finding)	Cardiac monitor surveillance (regime/therapy)	Administration of medication (procedure)	Plain radiography (procedure)	Plain radiography (procedure)	Discharge to home (procedure)
Backache (finding)	injury of muscle of upper back (disorder)	61	Female	2017-11-19	Referred by National Health Service 111 service (finding)	Patient given written advice (situation)	Intravenous cannulation (procedure)	Computerized axial tomography (procedure)	Computerized axial tomography (procedure)	Discharge to home (procedure)
Lower back injury (disorder)	contusion of face (disorder)	19	Female	2017-11-19	Self-referral to accident and emergency department (procedure)	Patient given written advice (situation)		Plain radiography (procedure)	Plain radiography (procedure)	Discharge to home (procedure)
Lower back injury (disorder)	lumbar sprain (disorder)	68	Male	2017-11-19	Self-referral to accident and emergency department (procedure)			Plain radiography (procedure)	Plain radiography (procedure)	Discharge to home (procedure)
Lower back injury (disorder)	neck sprain (disorder)	16	Female	2017-11-19	Self-referral to accident and emergency department (procedure)	Administration of medication (procedure)	Patient given written advice (situation)	Plain radiography (procedure)	Plain radiography (procedure)	Discharge to home (procedure)
Lower back injury (disorder)	superficial injury of abdominal wall (disorder)	80	Male	2017-11-19	Self-referral to accident and emergency department (procedure)	Administration of medication (procedure)	Patient given written advice (situation)	Electrocardiographic procedure (procedure)		Discharge to home (procedure)
Lower back injury (disorder)	superficial injury of back (disorder)	18	Female	2017-11-19	Self-referral to accident and emergency department (procedure)	Patient given written advice (situation)		Plain radiography (procedure)	Plain radiography (procedure)	Discharge to home (procedure)
Lower back injury (disorder)	superficial injury of back (disorder)	41	Female	2017-11-19	Self-referral to accident and emergency department (procedure)	Patient given written advice (situation)				Discharge to home (procedure)
Lower back injury (disorder)	superficial injury of back (disorder)	73	Male	2017-11-19	Self-referral to accident and emergency department (procedure)	Patient given written advice (situation)	New medication commenced (finding)	Plain radiography (procedure)	Plain radiography (procedure)	Discharge to home (procedure)
Backache (finding)		30	Female	2017-11-20	Self-referral to accident and emergency department (procedure)	Patient given written advice (situation)				Discharge to home (procedure)
Backache (finding)	disorder of nervous system (disorder)	30	Female	2017-11-20	Self-referral to accident and emergency department (procedure)	Patient given written advice (situation)	Intravenous cannulation (procedure)			Discharge to home (procedure)
Backache (finding)	injury of muscle of lower back (disorder)	33	Male	2017-11-20	Self-referral to accident and emergency department (procedure)	Patient given written advice (situation)				Emergency department discharge to ambulatory emergency care service (procedure)
Backache (finding)	lumbar sprain (disorder)	33	Female	2017-11-20	Self-referral to accident and emergency department (procedure)	Administration of medication (procedure)				Discharge to home (procedure)
Lower back injury (disorder)		23	Male	2017-11-20	Self-referral to accident and emergency department (procedure)					Emergency department discharge to ambulatory emergency care service (procedure)
Lower back injury (disorder)		43	Male	2017-11-20	Self-referral to accident and emergency department (procedure)					Emergency department discharge to ambulatory emergency care service (procedure)
Lower back injury (disorder)	closed fracture pelvis, coccyx (disorder)	45	Female	2017-11-20	Self-referral to accident and emergency department (procedure)	Patient given written advice (situation)	Administration of medication (procedure)			Discharge to home (procedure)
Lower back injury (disorder)	kidney disease (disorder)	91	Female	2017-11-20	Self-referral to accident and emergency department (procedure)	Patient given written advice (situation)				Discharge to home (procedure)
Lower back injury (disorder)	lumbar sprain (disorder)	20	Female	2017-11-20	Self-referral to accident and emergency department (procedure)	Administration of medication (procedure)				Discharge to home (procedure)
Lower back injury (disorder)	superficial injury of pelvic region (disorder)	31	Female	2017-11-20	Self-referral to accident and emergency department (procedure)	Patient given written advice (situation)				Discharge to home (procedure)
Upper back injury (disorder)	closed fracture of rib (disorder)	98	Female	2017-11-20	Self-referral to accident and emergency department (procedure)	Patient given written advice (situation)	Cardiac monitor surveillance (regime/therapy)	Plain radiography (procedure)	Plain radiography (procedure)	Discharge to nursing home (procedure)
Upper back injury (disorder)	neck sprain (disorder)	40	Male	2017-11-20	Self-referral to accident and emergency department (procedure)	Patient given written advice (situation)				Discharge to home (procedure)
Upper back injury (disorder)	superficial injury of neck (disorder)	53	Female	2017-11-20	Referred by National Health Service 111 service (finding)	Patient given written advice (situation)				Discharge to home (procedure)
Backache (finding)		28	Female	2017-11-21	Self-referral to accident and emergency department (procedure)					Discharge to home (procedure)
Backache (finding)		48	Male	2017-11-21	Referred by National Health Service 111 service (finding)	Cardiac monitor surveillance (regime/therapy)	Administration of medication (procedure)			Discharge to home (procedure)
Backache (finding)		77	Female	2017-11-21	Referred by ambulance service (finding)	Infusion of drug or medicament via intravenous route (procedure)	Cardiac monitor surveillance (regime/therapy)	Blood coagulation panel (procedure)	Complete blood count (procedure)	Discharge to home (procedure)
Backache (finding)	cauda equina syndrome (disorder)	23	Female	2017-11-21	Referred by member of Primary Health Care Team (finding)	Patient given written advice (situation)				Patient transfer, to another health care facility (procedure)
Backache (finding)	lumbar sprain (disorder)	34	Female	2017-11-21	Referred by member of Primary Health Care Team (finding)	Administration of medication (procedure)				Discharge to home (procedure)
Backache (finding)	lumbar sprain (disorder)	59	Female	2017-11-21	Referred by member of Primary Health Care Team (finding)	Administration of medication (procedure)		Plain radiography (procedure)	Plain radiography (procedure)	Discharge to home (procedure)
Backache (finding)	lumbar sprain (disorder)	65	Male	2017-11-21	Self-referral to accident and emergency department (procedure)	Administration of medication (procedure)				Discharge to home (procedure)
Backache (finding)	retention of urine (disorder)	38	Male	2017-11-21	Self-referral to accident and emergency department (procedure)			Blood coagulation panel (procedure)	Complete blood count (procedure)	Discharge to ward (procedure)
Lower back injury (disorder)		47	Male	2017-11-21	Self-referral to accident and emergency department (procedure)					Discharge to home (procedure)
Lower back injury (disorder)		81	Female	2017-11-21	Referred by member of Primary Health Care Team (finding)	Cardiac monitor surveillance (regime/therapy)	Administration of medication (procedure)	Plain radiography (procedure)	Plain radiography (procedure)	Discharge to home (procedure)
Lower back injury (disorder)	lumbar sprain (disorder)	55	Female	2017-11-21	Referred by ambulance service (finding)	Patient given written advice (situation)	New medication commenced (finding)	Blood coagulation panel (procedure)	Complete blood count (procedure)	Discharge to home (procedure)
Lower back injury (disorder)	pyelonephritis (disorder)	61	Female	2017-11-21	Referral by out of hours service (procedure)			Urinalysis (procedure)		Discharge to home (procedure)
Lower back injury (disorder)	superficial injury of pelvic region (disorder)	22	Female	2017-11-21	Referred by National Health Service 111 service (finding)	Patient given written advice (situation)				Discharge to home (procedure)
Upper back injury (disorder)		21	Male	2017-11-21	Self-referral to accident and emergency department (procedure)					Discharge to home (procedure)
Upper back injury (disorder)	lower respiratory tract infection (disorder)	88	Female	2017-11-21	Self-referral to accident and emergency department (procedure)	Patient given written advice (situation)	New medication commenced (finding)	Plain radiography (procedure)	Plain radiography (procedure)	Discharge to home (procedure)
Backache (finding)		30	Female	2017-11-22	Self-referral to accident and emergency department (procedure)					Discharge to home (procedure)
Backache (finding)		33	Female	2017-11-22	Self-referral to accident and emergency department (procedure)					Discharge to home (procedure)
Backache (finding)		81	Female	2017-11-22	Referred by ambulance service (finding)	Patient given written advice (situation)		Electrocardiographic procedure (procedure)		Discharge to home (procedure)
Backache (finding)		82	Female	2017-11-22	Referred by ambulance service (finding)	Administration of medication (procedure)	Cardiac monitor surveillance (regime/therapy)	Blood coagulation panel (procedure)	Complete blood count (procedure)	Discharge to home (procedure)
Backache (finding)		83	Female	2017-11-22	Referred by ambulance service (finding)	Cardiac monitor surveillance (regime/therapy)	Administration of medication (procedure)	Plain radiography (procedure)	Plain radiography (procedure)	Discharge to home (procedure)
Backache (finding)	patient walked out (finding)	20	Female	2017-11-22	Self-referral to accident and emergency department (procedure)			Complete blood count (procedure)	Urea and electrolytes (procedure)	Discharge to home (procedure)
Backache (finding)	problem related to social environment (disorder)	83	Female	2017-11-22	Self-referral to accident and emergency department (procedure)	Cardiac monitor surveillance (regime/therapy)				Discharge to home (procedure)
Backache (finding)	ureteric stone (disorder)	57	Male	2017-11-22	Referred by National Health Service 111 service (finding)	Patient given written advice (situation)		Urinalysis (procedure)		Discharge to home (procedure)
Backache (finding)	urinary tract infectious disease (disorder)	81	Female	2017-11-22	Referred by member of Primary Health Care Team (finding)	Patient given written advice (situation)				Discharge to home (procedure)
Lower back injury (disorder)		36	Female	2017-11-22	Self-referral to accident and emergency department (procedure)	Patient given written advice (situation)				Emergency department discharge to ambulatory emergency care service (procedure)
Lower back injury (disorder)		88	Female	2017-11-22	Referred by National Health Service 111 service (finding)	Activities of daily living assessment (procedure)		Plain radiography (procedure)	Plain radiography (procedure)	Discharge to home (procedure)
Lower back injury (disorder)	referral to general practitioner (procedure)	56	Male	2017-11-22	Self-referral to accident and emergency department (procedure)	Patient given written advice (situation)				Emergency department discharge to ambulatory emergency care service (procedure)
Lower back injury (disorder)	superficial injury of back (disorder)	39	Male	2017-11-22	Self-referral to accident and emergency department (procedure)	Administration of medication (procedure)		Plain radiography (procedure)	Plain radiography (procedure)	Discharge to home (procedure)
Backache (finding)		45	Female	2017-11-23	Self-referral to accident and emergency department (procedure)
Backache (finding)		75	Female	2017-11-23	Referred by ambulance service (finding)	Patient given written advice (situation)				Discharge to home (procedure)
Backache (finding)	strain of neck muscle (disorder)	30	Female	2017-11-23	Self-referral to accident and emergency department (procedure)	Patient given written advice (situation)	New medication commenced (finding)			Discharge to home (procedure)
Injury of cervical region of back (disorder)		54	Female	2017-11-23	Self-referral to accident and emergency department (procedure)	Patient given written advice (situation)				Discharge to home (procedure)
Lower back injury (disorder)	patient walked out (finding)	18	Female	2017-11-23	Self-referral to accident and emergency department (procedure)	Cardiac monitor surveillance (regime/therapy)				Discharge to home (procedure)
Lower back injury (disorder)	superficial injury of abdominal wall (disorder)	36	Female	2017-11-23	Self-referral to accident and emergency department (procedure)	Administration of medication (procedure)				Discharge to ward (procedure)
Backache (finding)		18	Male	2017-11-24	Self-referral to accident and emergency department (procedure)					Emergency department discharge to ambulatory emergency care service (procedure)
Backache (finding)	inguinal hernia (disorder)	49	Male	2017-11-24	Referred by National Health Service 111 service (finding)	Administration of medication (procedure)				Discharge to home (procedure)
Backache (finding)	injury of muscle of lower back (disorder)	29	Female	2017-11-24	Self-referral to accident and emergency department (procedure)	Patient given written advice (situation)				Discharge to home (procedure)
Backache (finding)	injury of muscle of lower back (disorder)	84	Male	2017-11-24	Referred by National Health Service 111 service (finding)	Patient given written advice (situation)	Administration of medication (procedure)			Discharge to ward (procedure)
Lower back injury (disorder)		24	Female	2017-11-24	Referred by member of Primary Health Care Team (finding)	Patient given written advice (situation)				Emergency department discharge to ambulatory emergency care service (procedure)
Lower back injury (disorder)		62	Male	2017-11-24	Self-referral to accident and emergency department (procedure)					Emergency department discharge to ambulatory emergency care service (procedure)
Upper back injury (disorder)	asthma (disorder)	60	Female	2017-11-24	Referred by member of Primary Health Care Team (finding)	Oxygen therapy (procedure)		Plain radiography (procedure)	Plain radiography (procedure)	Discharge to home (procedure)
Upper back injury (disorder)	injury of muscle of upper back (disorder)	61	Female	2017-11-24	Self-referral to accident and emergency department (procedure)	Patient given written advice (situation)	Cardiac monitor surveillance (regime/therapy)	Plain radiography (procedure)	Plain radiography (procedure)	Discharge to home (procedure)
Upper back injury (disorder)	strain of neck muscle (disorder)	27	Female	2017-11-24	Referred by National Health Service 111 service (finding)	Cardiac monitor surveillance (regime/therapy)	Patient given written advice (situation)			Discharge to home (procedure)
Backache (finding)		28	Male	2017-11-25	Self-referral to accident and emergency department (procedure)					Discharge to home (procedure)
Backache (finding)	injury of muscle of lower back (disorder)	61	Female	2017-11-25	Self-referral to accident and emergency department (procedure)	Administration of medication (procedure)	Cardiac monitor surveillance (regime/therapy)	Plain radiography (procedure)	Plain radiography (procedure)	Discharge to home (procedure)
Lower back injury (disorder)		32	Male	2017-11-25	Self-referral to accident and emergency department (procedure)	Patient given written advice (situation)	Administration of medication (procedure)	Plain radiography (procedure)	Plain radiography (procedure)	Patient transfer, to another health care facility (procedure)
Lower back injury (disorder)		82	Male	2017-11-25	Referred by National Health Service 111 service (finding)	Patient given written advice (situation)		Computerized axial tomography (procedure)	Computerized axial tomography (procedure)	Patient transfer, to another health care facility (procedure)
Lower back injury (disorder)	superficial injury of neck (disorder)	23	Male	2017-11-25	Self-referral to accident and emergency department (procedure)	Patient given written advice (situation)		Plain radiography (procedure)	Plain radiography (procedure)	Discharge to home (procedure)
Backache (finding)		18	Female	2017-11-26	Self-referral to accident and emergency department (procedure)					Emergency department discharge to ambulatory emergency care service (procedure)
Backache (finding)		21	Female	2017-11-26	Self-referral to accident and emergency department (procedure)					Emergency department discharge to ambulatory emergency care service (procedure)
Backache (finding)		45	Female	2017-11-26	Self-referral to accident and emergency department (procedure)					Discharge to home (procedure)
Backache (finding)		55	Male	2017-11-26	Self-referral to accident and emergency department (procedure)					Emergency department discharge to ambulatory emergency care service (procedure)
Backache (finding)		81	Female	2017-11-26	Self-referral to accident and emergency department (procedure)	Administration of medication (procedure)	Patient given written advice (situation)	Plain radiography (procedure)	Plain radiography (procedure)	Discharge to home (procedure)
Backache (finding)	injury of muscle of lower back (disorder)	47	Male	2017-11-26	Self-referral to accident and emergency department (procedure)					Discharge to home (procedure)
Backache (finding)	injury of muscle of lower back (disorder)	76	Female	2017-11-26	Self-referral to accident and emergency department (procedure)	Administration of medication (procedure)	Administration of medication (procedure)	Blood coagulation panel (procedure)	Complete blood count (procedure)	Discharge to home (procedure)
Backache (finding)	lumbar sprain (disorder)	25	Female	2017-11-26	Self-referral to accident and emergency department (procedure)	Administration of medication (procedure)				Discharge to home (procedure)
Backache (finding)	lumbar sprain (disorder)	39	Female	2017-11-26	Self-referral to accident and emergency department (procedure)	Cardiac monitor surveillance (regime/therapy)	Patient given written advice (situation)			Discharge to home (procedure)
Backache (finding)	superficial injury of back (disorder)	23	Male	2017-11-26	Referred by National Health Service 111 service (finding)	Patient given written advice (situation)		Plain radiography (procedure)	Plain radiography (procedure)	Discharge to home (procedure)
Lower back injury (disorder)		61	Female	2017-11-26	Referred by National Health Service 111 service (finding)	Patient given written advice (situation)		Computerized axial tomography (procedure)	Computerized axial tomography (procedure)	Discharge to ward (procedure)
Lower back injury (disorder)	closed fracture of pelvis (disorder)	46	Female	2017-11-26	Self-referral to accident and emergency department (procedure)	Administration of medication (procedure)		Blood coagulation panel (procedure)	Complete blood count (procedure)	Discharge to ward (procedure)
Lower back injury (disorder)	contusion of face (disorder)	18	Female	2017-11-26	Advised to attend accident and emergency department (situation)	Patient given written advice (situation)		Plain radiography (procedure)	Plain radiography (procedure)	Discharge to home (procedure)
Lower back injury (disorder)	open fracture thoracic vertebra (disorder)	21	Female	2017-11-26	Self-referral to accident and emergency department (procedure)	Patient given written advice (situation)		Plain radiography (procedure)	Plain radiography (procedure)	Discharge to home (procedure)
Lower back injury (disorder)	sciatica (disorder)	51	Male	2017-11-26	Self-referral to accident and emergency department (procedure)					Discharge to home (procedure)
Lower back injury (disorder)	superficial injury of back (disorder)	27	Female	2017-11-26	Self-referral to accident and emergency department (procedure)	Patient given written advice (situation)		Plain radiography (procedure)	Plain radiography (procedure)	Discharge to home (procedure)
Lower back injury (disorder)	superficial injury of back (disorder)	41	Male	2017-11-26	Self-referral to accident and emergency department (procedure)	Administration of medication (procedure)		Plain radiography (procedure)	Plain radiography (procedure)	Discharge to home (procedure)
Backache (finding)		23	Female	2017-11-27	Self-referral to accident and emergency department (procedure)					Emergency department discharge to ambulatory emergency care service (procedure)
Backache (finding)		34	Female	2017-11-27	Self-referral to accident and emergency department (procedure)					Discharge to home (procedure)
Backache (finding)		52	Female	2017-11-27	Self-referral to accident and emergency department (procedure)	Patient given written advice (situation)		Computerized axial tomography (procedure)	Computerized axial tomography (procedure)	Discharge to home (procedure)
Backache (finding)		54	Female	2017-11-27	Referred by member of Primary Health Care Team (finding)	Patient given written advice (situation)				Discharge to home (procedure)
Backache (finding)		87	Female	2017-11-27	Self-referral to accident and emergency department (procedure)	Cardiac monitor surveillance (regime/therapy)	Intravenous cannulation (procedure)	Blood coagulation panel (procedure)	Complete blood count (procedure)	Discharge to ward (procedure)
Backache (finding)		90	Female	2017-11-27	Self-referral to accident and emergency department (procedure)	Patient given written advice (situation)				Discharge to home (procedure)
Backache (finding)	injury of muscle of lower back (disorder)	40	Male	2017-11-27	Self-referral to accident and emergency department (procedure)	Patient given written advice (situation)				Discharge to home (procedure)
Backache (finding)	injury of muscle of lower back (disorder)	80	Female	2017-11-27	Referred by member of Primary Health Care Team (finding)	Patient given written advice (situation)		Plain radiography (procedure)	Plain radiography (procedure)	Discharge to home (procedure)
Backache (finding)	injury of muscle of lower back (disorder)	86	Female	2017-11-27	Referred by National Health Service 111 service (finding)	Patient given written advice (situation)				Discharge to home (procedure)
Backache (finding)	sciatica (disorder)	88	Male	2017-11-27	Self-referral to accident and emergency department (procedure)	Patient given written advice (situation)				Discharge to home (procedure)
Backache (finding)	sprain of knee (disorder)	78	Female	2017-11-27	Self-referral to accident and emergency department (procedure)	Cardiac monitor surveillance (regime/therapy)	Administration of medication (procedure)	Plain radiography (procedure)	Plain radiography (procedure)	Discharge to home (procedure)
Lower back injury (disorder)		19	Male	2017-11-27	Self-referral to accident and emergency department (procedure)					Discharge to home (procedure)
Lower back injury (disorder)		58	Female	2017-11-27	Referred by National Health Service 111 service (finding)					Discharge to home (procedure)
Lower back injury (disorder)	closed fracture lumbar vertebra (disorder)	63	Male	2017-11-27	Self-referral to accident and emergency department (procedure)	Administration of medication (procedure)		Computerized axial tomography (procedure)	Computerized axial tomography (procedure)	Patient transfer, to another health care facility (procedure)
Lower back injury (disorder)	injury of muscle of lower back (disorder)	23	Female	2017-11-27	Self-referral to accident and emergency department (procedure)	Administration of medication (procedure)	New medication commenced (finding)			Discharge to home (procedure)
Lower back injury (disorder)	injury of muscle of lower back (disorder)	35	Male	2017-11-27	Self-referral to accident and emergency department (procedure)	Administration of medication (procedure)	New medication commenced (finding)			Discharge to home (procedure)
Lower back injury (disorder)	injury of muscle of lower back (disorder)	53	Female	2017-11-27	Referred by ambulance service (finding)	Patient given written advice (situation)				Discharge to ward (procedure)
Lower back injury (disorder)	lumbar sprain (disorder)	26	Female	2017-11-27	Referred by carer (finding)	Patient given written advice (situation)		Plain radiography (procedure)	Plain radiography (procedure)	Discharge to home (procedure)
Lower back injury (disorder)	neck sprain (disorder)	45	Male	2017-11-27	Referred by member of Primary Health Care Team (finding)	New medication commenced (finding)				Discharge to home (procedure)
Lower back injury (disorder)	superficial injury of back (disorder)	27	Male	2017-11-27	Self-referral to accident and emergency department (procedure)					Discharge to home (procedure)
Lower back injury (disorder)	vasovagal syncope (disorder)	40	Male	2017-11-27	Referred by ambulance service (finding)	Intravenous cannulation (procedure)		Blood coagulation panel (procedure)	Complete blood count (procedure)	Discharge to home (procedure)
Upper back injury (disorder)	traumatic brain injury with no loss of consciousness (disorder)	83	Female	2017-11-27	Self-referral to accident and emergency department (procedure)	Application of dressing, minor (procedure)		Computerized axial tomography (procedure)	Computerized axial tomography (procedure)	Discharge to home (procedure)
Backache (finding)		32	Female	2017-11-28	Self-referral to accident and emergency department (procedure)					Emergency department discharge to ambulatory emergency care service (procedure)
Backache (finding)		34	Male	2017-11-28	Self-referral to accident and emergency department (procedure)					Discharge to home (procedure)
Backache (finding)		43	Female	2017-11-28	Self-referral to accident and emergency department (procedure)					Emergency department discharge to ambulatory emergency care service (procedure)
Backache (finding)		47	Male	2017-11-28	Referred by National Health Service 111 service (finding)	Patient given written advice (situation)				Discharge to home (procedure)
Backache (finding)	closed fracture pelvis, coccyx (disorder)	79	Female	2017-11-28	Self-referral to accident and emergency department (procedure)	Patient given written advice (situation)				Discharge to home (procedure)
Backache (finding)	ureteric stone (disorder)	76	Male	2017-11-28	Referred by National Health Service 111 service (finding)	Patient given written advice (situation)		Computerized axial tomography (procedure)	Computerized axial tomography (procedure)	Discharge to home (procedure)
Lower back injury (disorder)		19	Female	2017-11-28	Referred by National Health Service 111 service (finding)	Administration of medication (procedure)		Magnetic resonance imaging (procedure)	Magnetic resonance imaging (procedure)	Discharge to home (procedure)
Lower back injury (disorder)		35	Female	2017-11-28	Self-referral to accident and emergency department (procedure)					Discharge to home (procedure)
Lower back injury (disorder)		40	Male	2017-11-28	Self-referral to accident and emergency department (procedure)					Emergency department discharge to ambulatory emergency care service (procedure)
Lower back injury (disorder)		44	Female	2017-11-28	Self-referral to accident and emergency department (procedure)					Discharge to home (procedure)
Lower back injury (disorder)	closed fracture lumbar vertebra (disorder)	73	Male	2017-11-28	Self-referral to accident and emergency department (procedure)	Administration of medication (procedure)				Discharge to ward (procedure)
Lower back injury (disorder)	closed fracture lumbar vertebra (disorder)	74	Female	2017-11-28	Self-referral to accident and emergency department (procedure)	Cardiac monitor surveillance (regime/therapy)	Administration of medication (procedure)	Urea and electrolytes (procedure)	Blood coagulation panel (procedure)	Discharge to ward (procedure)
Lower back injury (disorder)	lumbar sprain (disorder)	26	Female	2017-11-28	Self-referral to accident and emergency department (procedure)	Patient given written advice (situation)				Discharge to home (procedure)
Lower back injury (disorder)	lumbar sprain (disorder)	41	Male	2017-11-28	Self-referral to accident and emergency department (procedure)	Patient given written advice (situation)	Patient given written advice (situation)			Discharge to home (procedure)
Backache (finding)		35	Female	2017-11-29	Referred by National Health Service 111 service (finding)	Local anaesthesia (procedure)				Discharge to home (procedure)
Backache (finding)	lumbar sprain (disorder)	70	Male	2017-11-29	Self-referral to accident and emergency department (procedure)					Discharge to home (procedure)
Lower back injury (disorder)		24	Male	2017-11-29	Self-referral to accident and emergency department (procedure)	Administration of medication (procedure)		Plain radiography (procedure)	Plain radiography (procedure)	Discharge to home (procedure)
Lower back injury (disorder)		29	Male	2017-11-29	Self-referral to accident and emergency department (procedure)					Discharge to home (procedure)
Lower back injury (disorder)	injury of muscle of lower back (disorder)	62	Female	2017-11-29	Self-referral to accident and emergency department (procedure)	Patient given written advice (situation)	Administration of medication (procedure)	Plain radiography (procedure)	Plain radiography (procedure)	Discharge to home (procedure)
Backache (finding)		49	Male	2017-11-30	Referred by member of Primary Health Care Team (finding)					Emergency department discharge to ambulatory emergency care service (procedure)
Backache (finding)		65	Female	2017-11-30	Referred by ambulance service (finding)					Emergency department discharge to ambulatory emergency care service (procedure)
Backache (finding)		77	Female	2017-11-30	Self-referral to accident and emergency department (procedure)	Patient given written advice (situation)	Administration of medication (procedure)	Blood coagulation panel (procedure)	Complete blood count (procedure)	Discharge to home (procedure)
Backache (finding)		83	Female	2017-11-30	Self-referral to accident and emergency department (procedure)	Cardiac monitor surveillance (regime/therapy)		Blood coagulation panel (procedure)	Complete blood count (procedure)	Discharge to home (procedure)
Backache (finding)	disorder of nervous system (disorder)	75	Male	2017-11-30	Referred by member of Primary Health Care Team (finding)	Administration of medication (procedure)		Complete blood count (procedure)	Urea and electrolytes (procedure)	Discharge to ward (procedure)
Backache (finding)	injury of muscle of lower back (disorder)	17	Female	2017-11-30	Self-referral to accident and emergency department (procedure)	Patient given written advice (situation)	Administration of medication (procedure)	Complete blood count (procedure)	Blood coagulation panel (procedure)	Discharge to home (procedure)
Backache (finding)	lower respiratory tract infection (disorder)	20	Female	2017-11-30	Referred by member of Primary Health Care Team (finding)	Administration of medication (procedure)		Complete blood count (procedure)	Blood coagulation panel (procedure)	Discharge to home (procedure)
Backache (finding)	lumbar sprain (disorder)	27	Male	2017-11-30	Self-referral to accident and emergency department (procedure)	Patient given written advice (situation)				Discharge to home (procedure)
Lower back injury (disorder)		61	Female	2017-11-30	Self-referral to accident and emergency department (procedure)	Patient given written advice (situation)	New medication commenced (finding)	Glucose measurement, blood, test strip (procedure)		Discharge to home (procedure)
Lower back injury (disorder)	closed fracture of hip (disorder)	76	Female	2017-11-30	Self-referral to accident and emergency department (procedure)			Blood coagulation panel (procedure)	Complete blood count (procedure)	Discharge to ward (procedure)
Lower back injury (disorder)	superficial injury of back (disorder)	24	Male	2017-11-30	Self-referral to accident and emergency department (procedure)					Discharge to home (procedure)
Lower back injury (disorder)	traumatic dislocation of joint of lumbar vertebra (disorder)	73	Female	2017-11-30	Self-referral to accident and emergency department (procedure)	Patient given written advice (situation)		Plain radiography (procedure)	Plain radiography (procedure)	Discharge to ward (procedure)
Backache (finding)		48	Male	2017-12-01	Self-referral to accident and emergency department (procedure)	Patient given written advice (situation)				Discharge to home (procedure)
Backache (finding)	closed fracture of rib (disorder)	78	Female	2017-12-01	Self-referral to accident and emergency department (procedure)	Administration of medication (procedure)		Plain radiography (procedure)	Plain radiography (procedure)	Discharge to home (procedure)
Backache (finding)	injury of muscle of lower back (disorder)	39	Male	2017-12-01	Self-referral to accident and emergency department (procedure)	Patient given written advice (situation)	New medication commenced (finding)			Discharge to home (procedure)
Backache (finding)	injury of muscle of upper back (disorder)	70	Female	2017-12-01	Referred by National Health Service 111 service (finding)	Administration of medication (procedure)		Plain radiography (procedure)	Plain radiography (procedure)	Discharge to home (procedure)
Lower back injury (disorder)		35	Male	2017-12-01	Self-referral to accident and emergency department (procedure)	Administration of medication (procedure)	Cardiac monitor surveillance (regime/therapy)	Plain radiography (procedure)	Plain radiography (procedure)	Discharge to home (procedure)
Lower back injury (disorder)	injury of muscle of lower back (disorder)	22	Female	2017-12-01	Self-referral to accident and emergency department (procedure)	Administration of medication (procedure)	New medication commenced (finding)			Discharge to home (procedure)
Lower back injury (disorder)	injury of muscle of lower back (disorder)	26	Male	2017-12-01	Self-referral to accident and emergency department (procedure)	New medication commenced (finding)				Discharge to home (procedure)
Lower back injury (disorder)	sciatica (disorder)	35	Female	2017-12-01	Referred by hospital outpatient department (finding)	Administration of medication (procedure)				Discharge to home (procedure)
Lower back injury (disorder)	superficial injury of back (disorder)	25	Female	2017-12-01	Self-referral to accident and emergency department (procedure)	Patient given written advice (situation)		Plain radiography (procedure)	Plain radiography (procedure)	Discharge to home (procedure)
Upper back injury (disorder)	injury of muscle of lower back (disorder)	25	Female	2017-12-01	Referred by member of Primary Health Care Team (finding)	Patient given written advice (situation)				Discharge to home (procedure)
Upper back injury (disorder)	superficial injury of back (disorder)	33	Female	2017-12-01	Referred by police (finding)	Patient given written advice (situation)				Discharge to home (procedure)
Backache (finding)		18	Female	2017-12-02	Self-referral to accident and emergency department (procedure)					Discharge to home (procedure)
Backache (finding)		44	Female	2017-12-02	Self-referral to accident and emergency department (procedure)					Discharge to ward (procedure)
Backache (finding)		67	Female	2017-12-02	Referred by National Health Service 111 service (finding)	Cardiac monitor surveillance (regime/therapy)		Plain radiography (procedure)	Plain radiography (procedure)	Patient transfer, to another health care facility (procedure)
Backache (finding)		68	Male	2017-12-02	Self-referral to accident and emergency department (procedure)					Discharge to home (procedure)
Backache (finding)	sciatica (disorder)	27	Male	2017-12-02	Referred by National Health Service 111 service (finding)	Patient given written advice (situation)				Discharge to home (procedure)
Backache (finding)	superficial injury of chest (disorder)	72	Male	2017-12-02	Self-referral to accident and emergency department (procedure)	Cardiac monitor surveillance (regime/therapy)				Discharge to home (procedure)
Lower back injury (disorder)		57	Male	2017-12-02	Self-referral to accident and emergency department (procedure)					Discharge to home (procedure)
Lower back injury (disorder)	injury of muscle of lower back (disorder)	39	Male	2017-12-02	Self-referral to accident and emergency department (procedure)	Administration of medication (procedure)				Discharge to home (procedure)
Lower back injury (disorder)	injury of muscle of lower back (disorder)	86	Female	2017-12-02	Self-referral to accident and emergency department (procedure)	Patient given written advice (situation)		Plain radiography (procedure)	Plain radiography (procedure)	Discharge to home (procedure)
Lower back injury (disorder)	traumatic brain injury with no loss of consciousness (disorder)	88	Male	2017-12-02	Self-referral to accident and emergency department (procedure)	Administration of medication (procedure)	Cardiac monitor surveillance (regime/therapy)	Computerized axial tomography (procedure)	Plain radiography (procedure)	Discharge to home (procedure)
Upper back injury (disorder)	superficial injury of abdominal wall (disorder)	26	Female	2017-12-02	Self-referral to accident and emergency department (procedure)	Administration of medication (procedure)	Cardiac monitor surveillance (regime/therapy)	Computerized axial tomography (procedure)	Computerized axial tomography (procedure)	Discharge to home (procedure)
Backache (finding)		20	Female	2017-12-03	Self-referral to accident and emergency department (procedure)					Emergency department discharge to ambulatory emergency care service (procedure)
Backache (finding)		28	Male	2017-12-03	Self-referral to accident and emergency department (procedure)	Administration of medication (procedure)				Discharge to home (procedure)
Backache (finding)		41	Female	2017-12-03	Self-referral to accident and emergency department (procedure)	Cardiac monitor surveillance (regime/therapy)	Administration of medication (procedure)			Discharge to home (procedure)
Backache (finding)	injury of muscle of lower back (disorder)	34	Female	2017-12-03	Self-referral to accident and emergency department (procedure)	Patient given written advice (situation)	New medication commenced (finding)			Discharge to home (procedure)
Backache (finding)	injury of muscle of lower back (disorder)	50	Female	2017-12-03	Self-referral to accident and emergency department (procedure)					Discharge to home (procedure)
Backache (finding)	ureteric stone (disorder)	40	Male	2017-12-03	Self-referral to accident and emergency department (procedure)	Patient given written advice (situation)		Urinalysis (procedure)		Discharge to home (procedure)
Backache (finding)	urinary tract infectious disease (disorder)	52	Female	2017-12-03	Self-referral to accident and emergency department (procedure)			Complete blood count (procedure)	Urea and electrolytes (procedure)	Discharge to home (procedure)
Lower back injury (disorder)		49	Female	2017-12-03	Self-referral to accident and emergency department (procedure)	Administration of medication (procedure)				Discharge to home (procedure)
Lower back injury (disorder)	injury of kidney (disorder)	84	Male	2017-12-03	Self-referral to accident and emergency department (procedure)	Patient given written advice (situation)	Administration of medication (procedure)	Complete blood count (procedure)	Blood coagulation panel (procedure)	Discharge to home (procedure)
Lower back injury (disorder)	superficial injury of back (disorder)	65	Male	2017-12-03	Referral by out of hours service (procedure)	Cardiac monitor surveillance (regime/therapy)		Plain radiography (procedure)	Plain radiography (procedure)	Discharge to home (procedure)
Lower back injury (disorder)	superficial injury of chest (disorder)	38	Male	2017-12-03	Self-referral to accident and emergency department (procedure)	Administration of medication (procedure)	Cardiac monitor surveillance (regime/therapy)	Plain radiography (procedure)	Plain radiography (procedure)	Discharge to home (procedure)
Lower back injury (disorder)	superficial injury of chest (disorder)	77	Female	2017-12-03	Self-referral to accident and emergency department (procedure)	Cardiac monitor surveillance (regime/therapy)		Plain radiography (procedure)	Plain radiography (procedure)	Discharge to home (procedure)
Backache (finding)		24	Female	2017-12-04	Self-referral to accident and emergency department (procedure)					Emergency department discharge to ambulatory emergency care service (procedure)
Backache (finding)	ascites (disorder)	88	Female	2017-12-04	Local Code	Patient given written advice (situation)		Diagnostic ultrasonography (procedure)		Discharge to ward (procedure)
Backache (finding)	injury of muscle of lower back (disorder)	39	Male	2017-12-04	Self-referral to accident and emergency department (procedure)	Administration of medication (procedure)	Administration of medication (procedure)			Discharge to home (procedure)
Lower back injury (disorder)		27	Male	2017-12-04	Self-referral to accident and emergency department (procedure)					Emergency department discharge to ambulatory emergency care service (procedure)
Lower back injury (disorder)		35	Male	2017-12-04	Self-referral to accident and emergency department (procedure)					Discharge to home (procedure)
Lower back injury (disorder)		37	Female	2017-12-04	Self-referral to accident and emergency department (procedure)					Emergency department discharge to ambulatory emergency care service (procedure)
Lower back injury (disorder)		45	Male	2017-12-04	Self-referral to accident and emergency department (procedure)	Patient given written advice (situation)				Discharge to home (procedure)
Lower back injury (disorder)	cerebral hemorrhage (disorder)	68	Male	2017-12-04	Self-referral to accident and emergency department (procedure)	Cardiac monitor surveillance (regime/therapy)	Administration of intravenous fluids (procedure)	Computerized axial tomography (procedure)	Computerized axial tomography (procedure)	Discharge to ward (procedure)
Lower back injury (disorder)	closed fracture thoracic vertebra (disorder)	72	Female	2017-12-04	Referred by urgent care service (finding)	Intravenous cannulation (procedure)	Administration of medication (procedure)	Computerized axial tomography (procedure)	Computerized axial tomography (procedure)	Discharge to ward (procedure)
Lower back injury (disorder)	crushing injury of thigh (disorder)	61	Male	2017-12-04	Self-referral to accident and emergency department (procedure)	Patient given written advice (situation)				Discharge to home (procedure)
Lower back injury (disorder)	injury of muscle of lower back (disorder)	18	Female	2017-12-04	Referred by hospital emergency department (finding)	Patient given written advice (situation)				Discharge to home (procedure)
Lower back injury (disorder)	injury of muscle of lower back (disorder)	48	Male	2017-12-04	Self-referral to accident and emergency department (procedure)	Administration of medication (procedure)				Discharge to home (procedure)
Lower back injury (disorder)	injury of muscle of lower back (disorder)	50	Male	2017-12-04	Referred by ambulance service (finding)	Administration of medication (procedure)				Discharge to home (procedure)
Lower back injury (disorder)	injury of muscle of lower back (disorder)	69	Female	2017-12-04	Self-referral to accident and emergency department (procedure)	Patient given written advice (situation)	Cardiac monitor surveillance (regime/therapy)	Urinalysis (procedure)		Discharge to home (procedure)
Lower back injury (disorder)	injury of muscle of upper back (disorder)	27	Male	2017-12-04	Self-referral to accident and emergency department (procedure)	Administration of medication (procedure)				Discharge to home (procedure)
Lower back injury (disorder)	superficial injury of back (disorder)	30	Female	2017-12-04	Referred by National Health Service 111 service (finding)	Patient given written advice (situation)				Discharge to home (procedure)
Backache (finding)		16	Female	2017-12-05	Self-referral to accident and emergency department (procedure)					Discharge to home (procedure)
Backache (finding)		34	Female	2017-12-05	Self-referral to accident and emergency department (procedure)					Discharge to home (procedure)
Backache (finding)		54	Male	2017-12-05	Self-referral to accident and emergency department (procedure)					Discharge to home (procedure)
Backache (finding)		87	Female	2017-12-05	Self-referral to accident and emergency department (procedure)	Administration of medication (procedure)	Cardiac monitor surveillance (regime/therapy)	Plain radiography (procedure)	Blood coagulation panel (procedure)	Discharge to home (procedure)
Backache (finding)	lumbar sprain (disorder)	92	Female	2017-12-05	Referred by ambulance service (finding)	Administration of medication (procedure)		Blood coagulation panel (procedure)	Complete blood count (procedure)	Discharge to home (procedure)
Backache (finding)	sciatica (disorder)	55	Male	2017-12-05	Referred by urgent care service (finding)	Administration of medication (procedure)	New medication commenced (finding)			Discharge to home (procedure)
Backache (finding)	vasovagal syncope (disorder)	81	Female	2017-12-05	Self-referral to accident and emergency department (procedure)	Intravenous cannulation (procedure)		Computerized axial tomography (procedure)	Computerized axial tomography (procedure)	Discharge to ward (procedure)
Lower back injury (disorder)		29	Male	2017-12-05	Self-referral to accident and emergency department (procedure)					Emergency department discharge to ambulatory emergency care service (procedure)
Lower back injury (disorder)		57	Female	2017-12-05	Self-referral to accident and emergency department (procedure)	Patient given written advice (situation)				Discharge to home (procedure)
Lower back injury (disorder)		59	Female	2017-12-05	Self-referral to accident and emergency department (procedure)	Patient given written advice (situation)				Discharge to home (procedure)
Lower back injury (disorder)		61	Male	2017-12-05	Self-referral to accident and emergency department (procedure)	Administration of medication (procedure)		Complete blood count (procedure)	Blood coagulation panel (procedure)	Discharge to home (procedure)
Lower back injury (disorder)	aspiration pneumonia (disorder)	69	Male	2017-12-05	Referred by member of Primary Health Care Team (finding)	Administration of medication (procedure)	Administration of intravenous fluids (procedure)	Plain radiography (procedure)	Plain radiography (procedure)	Discharge to ward (procedure)
Lower back injury (disorder)	closed fracture of ankle (disorder)	49	Male	2017-12-05	Referred by ambulance service (finding)	Patient given written advice (situation)		Computerized axial tomography (procedure)	Computerized axial tomography (procedure)	Discharge to home (procedure)
Lower back injury (disorder)	injury of muscle of lower back (disorder)	75	Female	2017-12-05	Referred by National Health Service 111 service (finding)	Patient given written advice (situation)		Computerized axial tomography (procedure)	Computerized axial tomography (procedure)	Discharge to home (procedure)
Lower back injury (disorder)	sprain of ankle (disorder)	20	Female	2017-12-05	Self-referral to accident and emergency department (procedure)	Patient given written advice (situation)		Plain radiography (procedure)	Plain radiography (procedure)	Discharge to home (procedure)
Lower back injury (disorder)	vasovagal syncope (disorder)	84	Male	2017-12-05	Referred by ambulance service (finding)	Administration of medication (procedure)		Blood coagulation panel (procedure)	Complete blood count (procedure)	Discharge to home (procedure)
Upper back injury (disorder)	pulmonary embolism (disorder)	68	Female	2017-12-05	Referral by out of hours service (procedure)	Patient given written advice (situation)	Cardiac monitor surveillance (regime/therapy)	Complete blood count (procedure)	Complete blood count (procedure)	Emergency department discharge to ambulatory emergency care service (procedure)
Backache (finding)		22	Male	2017-12-06	Self-referral to accident and emergency department (procedure)					Discharge to home (procedure)
Backache (finding)		46	Male	2017-12-06	Self-referral to accident and emergency department (procedure)					Emergency department discharge to emergency department short stay ward (procedure)
Backache (finding)		89	Female	2017-12-06	Referred by member of Primary Health Care Team (finding)	Administration of medication (procedure)				Discharge to home (procedure)
Backache (finding)	aspiration pneumonia (disorder)	72	Female	2017-12-06	Referred by National Health Service 111 service (finding)	Patient given written advice (situation)		Plain radiography (procedure)	Plain radiography (procedure)	Discharge to home (procedure)
Backache (finding)	calculus of bile duct (disorder)	39	Female	2017-12-06	Self-referral to accident and emergency department (procedure)	Patient given written advice (situation)		Blood coagulation panel (procedure)	Complete blood count (procedure)	Discharge to ward (procedure)
Backache (finding)	injury of muscle of lower back (disorder)	24	Female	2017-12-06	Self-referral to accident and emergency department (procedure)	New medication commenced (finding)				Discharge to home (procedure)
Backache (finding)	injury of muscle of lower back (disorder)	36	Female	2017-12-06	Referred by National Health Service 111 service (finding)	Cardiac monitor surveillance (regime/therapy)				Discharge to home (procedure)
Backache (finding)	injury of muscle of lower back (disorder)	49	Male	2017-12-06	Self-referral to accident and emergency department (procedure)	Patient given written advice (situation)				Discharge to home (procedure)
Backache (finding)	injury of muscle of upper back (disorder)	52	Male	2017-12-06	Self-referral to accident and emergency department (procedure)					Discharge to home (procedure)
Backache (finding)	superficial injury of back (disorder)	49	Female	2017-12-06	Referred by National Health Service 111 service (finding)	Patient given written advice (situation)		Plain radiography (procedure)	Plain radiography (procedure)	Discharge to home (procedure)
Injury of cervical region of back (disorder)	neck sprain (disorder)	51	Female	2017-12-06	Self-referral to accident and emergency department (procedure)	Patient given written advice (situation)		Plain radiography (procedure)	Plain radiography (procedure)	Discharge to home (procedure)
Lower back injury (disorder)		28	Male	2017-12-06	Self-referral to accident and emergency department (procedure)	Patient given written advice (situation)				Discharge to home (procedure)
Lower back injury (disorder)		45	Male	2017-12-06	Self-referral to accident and emergency department (procedure)	Patient given written advice (situation)		Plain radiography (procedure)	Plain radiography (procedure)	Discharge to home (procedure)
Lower back injury (disorder)		80	Female	2017-12-06	Referred by ambulance service (finding)	Patient given written advice (situation)		Plain radiography (procedure)	Plain radiography (procedure)	Discharge to home (procedure)
Lower back injury (disorder)	injury of muscle of lower back (disorder)	54	Female	2017-12-06	Referred by hospital emergency department (finding)	Cardiac monitor surveillance (regime/therapy)		Plain radiography (procedure)	Plain radiography (procedure)	Discharge to home (procedure)
Lower back injury (disorder)	neck sprain (disorder)	19	Male	2017-12-06	Self-referral to accident and emergency department (procedure)	Patient given written advice (situation)	New medication commenced (finding)			Discharge to home (procedure)
Lower back injury (disorder)	patient walked out (finding)	17	Male	2017-12-06	Self-referral to accident and emergency department (procedure)	Patient given written advice (situation)				Discharge to home (procedure)
Lower back injury (disorder)	strain of neck muscle (disorder)	35	Male	2017-12-06	Self-referral to accident and emergency department (procedure)	Administration of medication (procedure)				Discharge to home (procedure)
Upper back injury (disorder)	injury of muscle of lower back (disorder)	46	Female	2017-12-06	Self-referral to accident and emergency department (procedure)					Discharge to home (procedure)
Upper back injury (disorder)	strain of neck muscle (disorder)	37	Female	2017-12-06	Self-referral to accident and emergency department (procedure)	Administration of medication (procedure)		Plain radiography (procedure)	Plain radiography (procedure)	Discharge to home (procedure)
Backache (finding)		25	Male	2017-12-07	Self-referral to accident and emergency department (procedure)					Discharge to home (procedure)
Backache (finding)		26	Male	2017-12-07	Referred by National Health Service 111 service (finding)	Administration of medication (procedure)		Blood coagulation panel (procedure)	Complete blood count (procedure)	Discharge to home (procedure)
Backache (finding)		30	Male	2017-12-07	Self-referral to accident and emergency department (procedure)					Emergency department discharge to ambulatory emergency care service (procedure)
Backache (finding)		39	Male	2017-12-07	Self-referral to accident and emergency department (procedure)					Emergency department discharge to ambulatory emergency care service (procedure)
Backache (finding)		46	Female	2017-12-07	Referred by National Health Service 111 service (finding)					Discharge to home (procedure)
Backache (finding)		72	Male	2017-12-07	Referred by National Health Service 111 service (finding)	Administration of medication (procedure)		Complete blood count (procedure)	Urea and electrolytes (procedure)	Discharge to home (procedure)
Backache (finding)	hemorrhagic diarrhea (disorder)	50	Female	2017-12-07	Self-referral to accident and emergency department (procedure)	Intravenous antibiotic therapy (procedure)		Plain radiography (procedure)	Plain radiography (procedure)	Discharge to home (procedure)
Backache (finding)	injury of muscle of lower back (disorder)	52	Female	2017-12-07	Self-referral to accident and emergency department (procedure)	Patient given written advice (situation)	New medication commenced (finding)			Discharge to home (procedure)
Backache (finding)	injury of muscle of lower back (disorder)	52	Female	2017-12-07	Self-referral to accident and emergency department (procedure)	Patient given written advice (situation)				Discharge to home (procedure)
Backache (finding)	patient walked out (finding)	42	Female	2017-12-07	Self-referral to accident and emergency department (procedure)	Patient given written advice (situation)	Cardiac monitor surveillance (regime/therapy)			Discharge to home (procedure)
Lower back injury (disorder)	patient walked out (finding)	52	Male	2017-12-07	Self-referral to accident and emergency department (procedure)	Patient given written advice (situation)				Discharge to home (procedure)
Backache (finding)	injury of muscle of lower back (disorder)	80	Female	2017-12-08	Referred by member of Primary Health Care Team (finding)	Cardiac monitor surveillance (regime/therapy)	Intravenous cannulation (procedure)	Plain radiography (procedure)	Plain radiography (procedure)	Discharge to residential home (procedure)
Backache (finding)	lower respiratory tract infection (disorder)	80	Male	2017-12-08	Self-referral to accident and emergency department (procedure)	Patient given written advice (situation)	Administration of medication (procedure)	Blood coagulation panel (procedure)	Complete blood count (procedure)	Discharge to home (procedure)
Injury of cervical region of back (disorder)	strain of neck muscle (disorder)	33	Female	2017-12-08	Self-referral to accident and emergency department (procedure)	Patient given written advice (situation)	Cardiac monitor surveillance (regime/therapy)	Plain radiography (procedure)	Plain radiography (procedure)	Discharge to home (procedure)
Lower back injury (disorder)		33	Male	2017-12-08	Referred by National Health Service 111 service (finding)					Discharge to home (procedure)
Lower back injury (disorder)	injury of muscle of lower back (disorder)	35	Male	2017-12-08	Referred by urgent care service (finding)	Patient given written advice (situation)		Urinalysis (procedure)		Discharge to home (procedure)
Lower back injury (disorder)	injury of muscle of lower back (disorder)	73	Female	2017-12-08	Self-referral to accident and emergency department (procedure)	Administration of medication (procedure)				Discharge to home (procedure)
Backache (finding)		25	Male	2017-12-09	Self-referral to accident and emergency department (procedure)					Discharge to home (procedure)
Backache (finding)		32	Female	2017-12-09	Referred by National Health Service 111 service (finding)					Emergency department discharge to ambulatory emergency care service (procedure)
Backache (finding)		48	Male	2017-12-09	Self-referral to accident and emergency department (procedure)	Patient given written advice (situation)				Discharge to home (procedure)
Backache (finding)		57	Female	2017-12-09	Self-referral to accident and emergency department (procedure)					Emergency department discharge to ambulatory emergency care service (procedure)
Backache (finding)		59	Male	2017-12-09	Self-referral to accident and emergency department (procedure)					Emergency department discharge to ambulatory emergency care service (procedure)
Backache (finding)	constipation (disorder)	28	Male	2017-12-09	Referred by National Health Service 111 service (finding)	Patient given written advice (situation)		Blood coagulation panel (procedure)	Complete blood count (procedure)	Discharge to home (procedure)
Backache (finding)	injury of muscle of lower back (disorder)	28	Male	2017-12-09	Self-referral to accident and emergency department (procedure)	Administration of medication (procedure)				Discharge to home (procedure)
Backache (finding)	injury of muscle of lower back (disorder)	31	Male	2017-12-09	Self-referral to accident and emergency department (procedure)	Patient given written advice (situation)				Discharge to home (procedure)
Backache (finding)	injury of muscle of lower back (disorder)	52	Female	2017-12-09	Self-referral to accident and emergency department (procedure)	Administration of medication (procedure)				Discharge to home (procedure)
Backache (finding)	lower respiratory tract infection (disorder)	23	Female	2017-12-09	Referred by National Health Service 111 service (finding)	Patient given written advice (situation)	New medication commenced (finding)	Plain radiography (procedure)	Plain radiography (procedure)	Discharge to home (procedure)
Backache (finding)	pulmonary embolism (disorder)	53	Female	2017-12-09	Self-referral to accident and emergency department (procedure)	Administration of medication (procedure)	New medication commenced (finding)	Blood coagulation panel (procedure)	Complete blood count (procedure)	Discharge to home (procedure)
Lower back injury (disorder)	sciatica (disorder)	61	Male	2017-12-09	Self-referral to accident and emergency department (procedure)	Administration of medication (procedure)				Discharge to home (procedure)
Upper back injury (disorder)	ureteric stone (disorder)	60	Female	2017-12-09	Self-referral to accident and emergency department (procedure)	Patient given written advice (situation)	Administration of medication (procedure)	Complete blood count (procedure)	Blood coagulation panel (procedure)	Discharge to home (procedure)
Backache (finding)		20	Female	2017-12-10	Self-referral to accident and emergency department (procedure)					Discharge to home (procedure)
Backache (finding)		35	Male	2017-12-10	Self-referral to accident and emergency department (procedure)					Discharge to home (procedure)
Backache (finding)		41	Male	2017-12-10	Self-referral to accident and emergency department (procedure)					Emergency department discharge to ambulatory emergency care service (procedure)
Backache (finding)		45	Male	2017-12-10	Self-referral to accident and emergency department (procedure)					Discharge to home (procedure)
Backache (finding)		71	Female	2017-12-10	Referred by ambulance service (finding)	Patient given written advice (situation)	Administration of medication (procedure)	Plain radiography (procedure)	Plain radiography (procedure)	Patient transfer, to another health care facility (procedure)
Lower back injury (disorder)		29	Female	2017-12-10	Referred by National Health Service 111 service (finding)	Patient given written advice (situation)		Plain radiography (procedure)	Plain radiography (procedure)	Discharge to home (procedure)
Lower back injury (disorder)	closed fracture of rib (disorder)	94	Female	2017-12-10	Self-referral to accident and emergency department (procedure)	Administration of medication (procedure)		Plain radiography (procedure)	Plain radiography (procedure)	Discharge to ward (procedure)
Lower back injury (disorder)	superficial injury of back (disorder)	28	Male	2017-12-10	Self-referral to accident and emergency department (procedure)	Patient given written advice (situation)	Infusion of drug or medicament via intravenous route (procedure)	Plain radiography (procedure)	Plain radiography (procedure)	Discharge to home (procedure)
Lower back injury (disorder)	superficial injury of back (disorder)	51	Female	2017-12-10	Referred by National Health Service 111 service (finding)	Patient given written advice (situation)		Plain radiography (procedure)	Plain radiography (procedure)	Discharge to home (procedure)
Lower back injury (disorder)	superficial injury of back (disorder)	56	Female	2017-12-10	Self-referral to accident and emergency department (procedure)	Administration of medication (procedure)		Plain radiography (procedure)	Plain radiography (procedure)	Discharge to home (procedure)
Lower back injury (disorder)	superficial injury of back (disorder)	74	Female	2017-12-10	Self-referral to accident and emergency department (procedure)	Patient given written advice (situation)	Administration of medication (procedure)			Discharge to home (procedure)
Lower back injury (disorder)	superficial injury of chest (disorder)	50	Male	2017-12-10	Self-referral to accident and emergency department (procedure)	Patient given written advice (situation)				Discharge to home (procedure)
Backache (finding)		37	Female	2017-12-11	Self-referral to accident and emergency department (procedure)					Discharge to home (procedure)
Backache (finding)	injury of muscle of lower back (disorder)	86	Female	2017-12-11	Referred by hospital emergency department (finding)	Patient given written advice (situation)		Magnetic resonance imaging (procedure)	Magnetic resonance imaging (procedure)	Discharge to home (procedure)
Backache (finding)	lumbar sprain (disorder)	54	Female	2017-12-11	Self-referral to accident and emergency department (procedure)	Patient given written advice (situation)				Discharge to home (procedure)
Backache (finding)	patient walked out (finding)	52	Female	2017-12-11	Referred by National Health Service 111 service (finding)	Patient given written advice (situation)	Administration of medication (procedure)			Discharge to home (procedure)
Lower back injury (disorder)	lower respiratory tract infection (disorder)	74	Male	2017-12-11	Self-referral to accident and emergency department (procedure)	Administration of medication (procedure)	Inhaled drug administration (procedure)	Plain radiography (procedure)	Plain radiography (procedure)	Discharge to ward (procedure)
Upper back injury (disorder)		19	Male	2017-12-11	Self-referral to accident and emergency department (procedure)					Emergency department discharge to ambulatory emergency care service (procedure)
Backache (finding)		43	Male	2017-12-12	Self-referral to accident and emergency department (procedure)					Discharge to home (procedure)
Backache (finding)		78	Male	2017-12-12	Self-referral to accident and emergency department (procedure)					Discharge to home (procedure)
Backache (finding)	injury of muscle of lower back (disorder)	72	Male	2017-12-12	Referral by out of hours service (procedure)	Administration of medication (procedure)				Discharge to home (procedure)
Backache (finding)	injury of muscle of thigh (disorder)	54	Male	2017-12-12	Self-referral to accident and emergency department (procedure)	Patient given written advice (situation)		Blood coagulation panel (procedure)	Complete blood count (procedure)	Discharge to home (procedure)
Backache (finding)	patient walked out (finding)	18	Female	2017-12-12	Referred by National Health Service 111 service (finding)					Discharge to home (procedure)
Lower back injury (disorder)		20	Male	2017-12-12	Self-referral to accident and emergency department (procedure)					Discharge to home (procedure)
Lower back injury (disorder)		21	Male	2017-12-12	Referred by member of Primary Health Care Team (finding)					Discharge to home (procedure)
Lower back injury (disorder)		56	Male	2017-12-12	Self-referral to accident and emergency department (procedure)					Discharge to home (procedure)
Lower back injury (disorder)	injury of muscle of lower back (disorder)	33	Male	2017-12-12	Self-referral to accident and emergency department (procedure)	Administration of medication (procedure)	New medication commenced (finding)			Discharge to home (procedure)
Lower back injury (disorder)	lumbar sprain (disorder)	60	Male	2017-12-12	Self-referral to accident and emergency department (procedure)	Patient given written advice (situation)				Discharge to home (procedure)
Lower back injury (disorder)	patient walked out (finding)	25	Female	2017-12-12	Referred by ambulance service (finding)	Patient given written advice (situation)				Discharge to home (procedure)
Lower back injury (disorder)	superficial injury of hip (disorder)	52	Female	2017-12-12	Self-referral to accident and emergency department (procedure)	Patient given written advice (situation)		Plain radiography (procedure)	Plain radiography (procedure)	Discharge to home (procedure)
Lower back injury (disorder)	traumatic injury during pregnancy (disorder)	35	Female	2017-12-12	Referred by National Health Service 111 service (finding)					Discharge to ward (procedure)
Upper back injury (disorder)	injury of muscle of lower back (disorder)	31	Female	2017-12-12	Self-referral to accident and emergency department (procedure)	Administration of medication (procedure)	New medication commenced (finding)			Discharge to home (procedure)
Upper back injury (disorder)	patient walked out (finding)	52	Male	2017-12-12	Self-referral to accident and emergency department (procedure)	Patient given written advice (situation)				Discharge to home (procedure)
Backache (finding)		27	Female	2017-12-13	Referred by member of Primary Health Care Team (finding)	Patient given written advice (situation)				Discharge to home (procedure)
Backache (finding)	injury of muscle of lower back (disorder)	33	Female	2017-12-13	Referred by National Health Service 111 service (finding)	Administration of medication (procedure)		Plain radiography (procedure)	Plain radiography (procedure)	Discharge to home (procedure)
Backache (finding)	orchitis and epididymitis (disorder)	59	Male	2017-12-13	Self-referral to accident and emergency department (procedure)	Patient given written advice (situation)		Diagnostic ultrasonography (procedure)	Complete blood count (procedure)	Discharge to home (procedure)
Injury of cervical region of back (disorder)	superficial injury of hip (disorder)	45	Male	2017-12-13	Self-referral to accident and emergency department (procedure)	Administration of medication (procedure)		Computerized axial tomography (procedure)	Computerized axial tomography (procedure)	Discharge to home (procedure)
Lower back injury (disorder)		45	Female	2017-12-13	Self-referral to accident and emergency department (procedure)					Discharge to home (procedure)
Lower back injury (disorder)	injury of muscle of lower back (disorder)	50	Male	2017-12-13	Referral by out of hours service (procedure)	Cardiac monitor surveillance (regime/therapy)	Patient given written advice (situation)			Discharge to home (procedure)
Lower back injury (disorder)	superficial injury of back (disorder)	24	Female	2017-12-13	Referred by National Health Service 111 service (finding)	Patient given written advice (situation)				Discharge to home (procedure)
Upper back injury (disorder)		62	Female	2017-12-13	Self-referral to accident and emergency department (procedure)					Discharge to home (procedure)
Backache (finding)		27	Male	2017-12-14	Self-referral to accident and emergency department (procedure)					Discharge to home (procedure)
Backache (finding)		27	Female	2017-12-14	Referred by National Health Service 111 service (finding)	Cardiac monitor surveillance (regime/therapy)				Discharge to home (procedure)
Backache (finding)		56	Male	2017-12-14	Self-referral to accident and emergency department (procedure)					Discharge to home (procedure)
Backache (finding)		59	Female	2017-12-14	Referred by hospital emergency department (finding)	Cardiac monitor surveillance (regime/therapy)		Plain radiography (procedure)	Plain radiography (procedure)	Discharge to home (procedure)
Backache (finding)	injury of muscle of lower back (disorder)	58	Male	2017-12-14	Self-referral to accident and emergency department (procedure)	Administration of medication (procedure)				Discharge to home (procedure)
Backache (finding)	lumbar sprain (disorder)	54	Female	2017-12-14	Referred by member of Primary Health Care Team (finding)	Patient given written advice (situation)		Diagnostic ultrasonography (procedure)		Discharge to home (procedure)
Backache (finding)	lumbar sprain (disorder)	72	Female	2017-12-14	Self-referral to accident and emergency department (procedure)	Administration of medication (procedure)				Discharge to home (procedure)
Backache (finding)	sciatica (disorder)	45	Male	2017-12-14	Referred by National Health Service 111 service (finding)	Patient given written advice (situation)	New medication commenced (finding)	Magnetic resonance imaging (procedure)	Magnetic resonance imaging (procedure)	Discharge to ward (procedure)
Lower back injury (disorder)		36	Female	2017-12-14	Referred by member of Primary Health Care Team (finding)					Emergency department discharge to ambulatory emergency care service (procedure)
Lower back injury (disorder)		47	Male	2017-12-14	Self-referral to accident and emergency department (procedure)	Administration of medication (procedure)				Discharge to home (procedure)
Lower back injury (disorder)	closed fracture lumbar vertebra (disorder)	87	Female	2017-12-14	Referred by carer (finding)	Patient given written advice (situation)				Discharge to home (procedure)
Lower back injury (disorder)	injury of muscle of lower back (disorder)	71	Male	2017-12-14	Self-referral to accident and emergency department (procedure)	Patient given written advice (situation)	New medication commenced (finding)	Plain radiography (procedure)	Plain radiography (procedure)	Discharge to home (procedure)
Backache (finding)		51	Female	2017-12-15	Self-referral to accident and emergency department (procedure)					Discharge to home (procedure)
Backache (finding)	lumbar sprain (disorder)	77	Male	2017-12-15	Referred by National Health Service 111 service (finding)	Administration of medication (procedure)		Complete blood count (procedure)	Urea and electrolytes (procedure)	Discharge to ward (procedure)
Backache (finding)	sciatica (disorder)	37	Male	2017-12-15	Self-referral to accident and emergency department (procedure)	Patient given written advice (situation)				Discharge to home (procedure)
Lower back injury (disorder)		38	Male	2017-12-15	Referral by out of hours service (procedure)					Discharge to home (procedure)
Lower back injury (disorder)		38	Male	2017-12-15	Self-referral to accident and emergency department (procedure)	Patient given written advice (situation)				Discharge to home (procedure)
Lower back injury (disorder)	closed fracture of rib (disorder)	53	Male	2017-12-15	Self-referral to accident and emergency department (procedure)	Cardiac monitor surveillance (regime/therapy)	Administration of medication (procedure)	Plain radiography (procedure)	Plain radiography (procedure)	Discharge to home (procedure)
Lower back injury (disorder)	closed fracture of rib (disorder)	75	Male	2017-12-15	Self-referral to accident and emergency department (procedure)	Patient given written advice (situation)	New medication commenced (finding)			Discharge to home (procedure)
Lower back injury (disorder)	closed fracture pelvis, coccyx (disorder)	64	Female	2017-12-15	Referred by member of Primary Health Care Team (finding)	Patient given written advice (situation)				Discharge to home (procedure)
Lower back injury (disorder)	injury of muscle of lower back (disorder)	35	Female	2017-12-15	Referred by National Health Service 111 service (finding)	Patient given written advice (situation)				Discharge to ward (procedure)
Lower back injury (disorder)	injury of muscle of lower back (disorder)	84	Male	2017-12-15	Referral by out of hours service (procedure)	Patient given written advice (situation)		Blood coagulation panel (procedure)	Complete blood count (procedure)	Discharge to home (procedure)
Lower back injury (disorder)	pneumonia (disorder)	76	Male	2017-12-15	Self-referral to accident and emergency department (procedure)	Administration of medication (procedure)		Computerized axial tomography (procedure)	Computerized axial tomography (procedure)	Discharge to ward (procedure)
Lower back injury (disorder)	superficial injury of back (disorder)	17	Female	2017-12-15	Self-referral to accident and emergency department (procedure)	Administration of medication (procedure)				Discharge to home (procedure)
Upper back injury (disorder)		70	Male	2017-12-15	Self-referral to accident and emergency department (procedure)	Patient given written advice (situation)		Plain radiography (procedure)	Plain radiography (procedure)	Discharge to home (procedure)
Upper back injury (disorder)	injury of muscle of upper back (disorder)	48	Male	2017-12-15	Self-referral to accident and emergency department (procedure)	New medication commenced (finding)		Plain radiography (procedure)	Plain radiography (procedure)	Discharge to home (procedure)
Upper back injury (disorder)	lower respiratory tract infection (disorder)	38	Female	2017-12-15	Referred by National Health Service 111 service (finding)	Patient given written advice (situation)		Urinalysis (procedure)	Human chorionic gonadotropin measurement (procedure)	Discharge to residential home (procedure)
Backache (finding)		42	Female	2017-12-16	Self-referral to accident and emergency department (procedure)	Administration of medication (procedure)				Patient transfer, to another health care facility (procedure)
Backache (finding)		52	Female	2017-12-16	Self-referral to accident and emergency department (procedure)					Discharge to home (procedure)
Backache (finding)	injury of muscle of lower back (disorder)	42	Female	2017-12-16	Self-referral to accident and emergency department (procedure)	Patient given written advice (situation)	Administration of medication (procedure)			Discharge to home (procedure)
Backache (finding)	sciatica (disorder)	46	Male	2017-12-16	Referred by National Health Service 111 service (finding)	Administration of medication (procedure)		Blood coagulation panel (procedure)	Complete blood count (procedure)	Discharge to home (procedure)
Backache (finding)	sciatica (disorder)	51	Male	2017-12-16	Self-referral to accident and emergency department (procedure)	Administration of medication (procedure)				Discharge to home (procedure)
Backache (finding)	sciatica (disorder)	57	Female	2017-12-16	Self-referral to accident and emergency department (procedure)	Patient given written advice (situation)	Administration of medication (procedure)			Discharge to home (procedure)
Lower back injury (disorder)		55	Male	2017-12-16	Referred by ambulance service (finding)	Administration of medication (procedure)		Blood coagulation panel (procedure)	Complete blood count (procedure)	Discharge to home (procedure)
Lower back injury (disorder)	chronic obstructive lung disease (disorder)	85	Male	2017-12-16	Referred by hospital outpatient department (finding)			Blood coagulation panel (procedure)	Complete blood count (procedure)	Discharge to ward (procedure)
Upper back injury (disorder)		78	Male	2017-12-16	Referred by National Health Service 111 service (finding)	Patient given written advice (situation)				Discharge to home (procedure)
Upper back injury (disorder)	patient walked out (finding)	53	Female	2017-12-16	Self-referral to accident and emergency department (procedure)	Patient given written advice (situation)				Discharge to home (procedure)
Upper back injury (disorder)	superficial injury of back (disorder)	61	Female	2017-12-16	Referred by National Health Service 111 service (finding)	Patient given written advice (situation)				Discharge to home (procedure)
Upper back injury (disorder)	superficial injury of back (disorder)	66	Male	2017-12-16	Self-referral to accident and emergency department (procedure)	Patient given written advice (situation)				Discharge to home (procedure)
Backache (finding)		42	Female	2017-12-17	Referred by National Health Service 111 service (finding)					Discharge to home (procedure)
Backache (finding)		43	Male	2017-12-17	Self-referral to accident and emergency department (procedure)					Discharge to home (procedure)
Backache (finding)	disorder of ovary (disorder)	42	Female	2017-12-17	Referral by out of hours service (procedure)	Patient given written advice (situation)		Diagnostic ultrasonography (procedure)	Diagnostic ultrasonography (procedure)	Discharge to home (procedure)
Backache (finding)	injury of muscle of lower back (disorder)	30	Female	2017-12-17	Referred by National Health Service 111 service (finding)	Cardiac monitor surveillance (regime/therapy)		Plain radiography (procedure)	Plain radiography (procedure)	Discharge to home (procedure)
Backache (finding)	injury of muscle of lower back (disorder)	42	Female	2017-12-17		Cardiac monitor surveillance (regime/therapy)				Discharge to home (procedure)
Backache (finding)	injury of muscle of lower back (disorder)	77	Female	2017-12-17	Referred by National Health Service 111 service (finding)	Administration of medication (procedure)				Discharge to home (procedure)
Backache (finding)	urinary tract infectious disease (disorder)	60	Female	2017-12-17	Referred by National Health Service 111 service (finding)	New medication commenced (finding)		Urinalysis (procedure)		Discharge to home (procedure)
Lower back injury (disorder)		45	Male	2017-12-17	Referral by out of hours service (procedure)	Patient given written advice (situation)				Discharge to home (procedure)
Lower back injury (disorder)	cauda equina syndrome (disorder)	62	Male	2017-12-17	Self-referral to accident and emergency department (procedure)	Administration of medication (procedure)		Complete blood count (procedure)	Blood coagulation panel (procedure)	Discharge to ward (procedure)
Lower back injury (disorder)	injury of muscle of lower back (disorder)	34	Female	2017-12-17	Self-referral to accident and emergency department (procedure)	Administration of medication (procedure)		Urinalysis (procedure)	Human chorionic gonadotropin measurement (procedure)	Discharge to home (procedure)
Lower back injury (disorder)	injury of muscle of lower back (disorder)	51	Male	2017-12-17	Referred by urgent care service (finding)	New medication commenced (finding)				Discharge to home (procedure)
Lower back injury (disorder)	injury of muscle of lower back (disorder)	77	Male	2017-12-17	Referred by National Health Service 111 service (finding)	Patient given written advice (situation)				Discharge to home (procedure)
Lower back injury (disorder)	lumbar sprain (disorder)	28	Female	2017-12-17	Referral by out of hours service (procedure)	Patient given written advice (situation)		Plain radiography (procedure)	Plain radiography (procedure)	Discharge to home (procedure)
Upper back injury (disorder)	injury of muscle of upper back (disorder)	49	Male	2017-12-17	Self-referral to accident and emergency department (procedure)	Cardiac monitor surveillance (regime/therapy)	Administration of medication (procedure)	Blood coagulation panel (procedure)	Complete blood count (procedure)	Discharge to home (procedure)
Upper back injury (disorder)	superficial injury of back (disorder)	36	Male	2017-12-17	Referred by hospital emergency department (finding)	Administration of medication (procedure)				Discharge to home (procedure)
Backache (finding)		37	Male	2017-12-18	Self-referral to accident and emergency department (procedure)					Discharge to home (procedure)
Backache (finding)	injury of muscle of lower back (disorder)	49	Female	2017-12-18	Self-referral to accident and emergency department (procedure)	Administration of medication (procedure)	Administration of medication (procedure)			Discharge to home (procedure)
Backache (finding)	patient walked out (finding)	25	Female	2017-12-18	Self-referral to accident and emergency department (procedure)					Discharge to home (procedure)
Backache (finding)	pulmonary embolism (disorder)	72	Male	2017-12-18	Referred by National Health Service 111 service (finding)	Intravenous cannulation (procedure)		Plain radiography (procedure)	Plain radiography (procedure)	Emergency department discharge to ambulatory emergency care service (procedure)
Lower back injury (disorder)	injury of muscle of upper back (disorder)	43	Male	2017-12-18	Self-referral to accident and emergency department (procedure)					Discharge to home (procedure)
Lower back injury (disorder)	lumbar sprain (disorder)	38	Male	2017-12-18	Self-referral to accident and emergency department (procedure)					Discharge to home (procedure)
Lower back injury (disorder)	patient walked out (finding)	81	Male	2017-12-18	Referred by National Health Service 111 service (finding)	Patient given written advice (situation)				Discharge to home (procedure)
Lower back injury (disorder)	superficial injury of back (disorder)	77	Male	2017-12-18	Referred by National Health Service 111 service (finding)	Patient given written advice (situation)				Discharge to home (procedure)
Upper back injury (disorder)	injury of muscle of shoulder (disorder)	47	Male	2017-12-18	Self-referral to accident and emergency department (procedure)			Plain radiography (procedure)	Plain radiography (procedure)	Discharge to home (procedure)
Upper back injury (disorder)	injury of muscle of upper back (disorder)	61	Female	2017-12-18	Self-referral to accident and emergency department (procedure)	Administration of medication (procedure)				Discharge to home (procedure)
Backache (finding)		19	Female	2017-12-19	Self-referral to accident and emergency department (procedure)					Discharge to home (procedure)
Backache (finding)		25	Female	2017-12-19	Self-referral to accident and emergency department (procedure)					Discharge to home (procedure)
Backache (finding)		52	Male	2017-12-19	Self-referral to accident and emergency department (procedure)					Discharge to home (procedure)
Backache (finding)		58	Female	2017-12-19	Self-referral to accident and emergency department (procedure)					Discharge to home (procedure)
Backache (finding)	injury of muscle of lower back (disorder)	77	Female	2017-12-19	Referred by National Health Service 111 service (finding)	Patient given written advice (situation)		Blood coagulation panel (procedure)	Complete blood count (procedure)	Discharge to home (procedure)
Backache (finding)	non-Hodgkin's lymphoma (disorder)	48	Female	2017-12-19	Referred by member of Primary Health Care Team (finding)	Intravenous cannulation (procedure)	Administration of medication (procedure)	Blood culture (procedure)	Complete blood count (procedure)	Discharge to ward (procedure)
Backache (finding)	sciatica (disorder)	46	Male	2017-12-19	Referred by member of Primary Health Care Team (finding)	Administration of medication (procedure)				Discharge to home (procedure)
Backache (finding)	ureteric stone (disorder)	58	Female	2017-12-19	Self-referral to accident and emergency department (procedure)	Patient given written advice (situation)	Cardiac monitor surveillance (regime/therapy)	Plain radiography (procedure)	Plain radiography (procedure)	Discharge to ward (procedure)
Lower back injury (disorder)		19	Female	2017-12-19	Self-referral to accident and emergency department (procedure)					Discharge to home (procedure)
Lower back injury (disorder)	pyelonephritis (disorder)	37	Female	2017-12-19	Self-referral to accident and emergency department (procedure)	Intravenous cannulation (procedure)	Administration of intravenous fluids (procedure)	Blood coagulation panel (procedure)	Complete blood count (procedure)	Discharge to ward (procedure)
Upper back injury (disorder)		21	Female	2017-12-19	Self-referral to accident and emergency department (procedure)					Discharge to home (procedure)
Backache (finding)		21	Female	2017-12-20	Self-referral to accident and emergency department (procedure)					Discharge to home (procedure)
Backache (finding)		33	Male	2017-12-20	Self-referral to accident and emergency department (procedure)					Emergency department discharge to ambulatory emergency care service (procedure)
Backache (finding)		47	Female	2017-12-20	Self-referral to accident and emergency department (procedure)					Discharge to home (procedure)
Backache (finding)	injury of muscle of lower back (disorder)	34	Female	2017-12-20	Referred by National Health Service 111 service (finding)	Patient given written advice (situation)				Discharge to home (procedure)
Backache (finding)	nerve injury (disorder)	65	Male	2017-12-20	Referred by member of Primary Health Care Team (finding)					Emergency department discharge to ambulatory emergency care service (procedure)
Lower back injury (disorder)		27	Female	2017-12-20	Self-referral to accident and emergency department (procedure)					Discharge to home (procedure)
Lower back injury (disorder)		39	Male	2017-12-20	Self-referral to accident and emergency department (procedure)			Electrocardiographic procedure (procedure)		Discharge to home (procedure)
Lower back injury (disorder)		70	Male	2017-12-20	Referred by National Health Service 111 service (finding)					Discharge to home (procedure)
Lower back injury (disorder)	cauda equina syndrome (disorder)	69	Female	2017-12-20	Referred by member of Primary Health Care Team (finding)	Patient given written advice (situation)				Discharge to ward (procedure)
Lower back injury (disorder)	closed fracture of hip (disorder)	99	Female	2017-12-20	Referred by member of Primary Health Care Team (finding)	Administration of medication (procedure)		Computerized axial tomography (procedure)	Computerized axial tomography (procedure)	Discharge to ward (procedure)
Lower back injury (disorder)	closed fracture pelvis, coccyx (disorder)	67	Female	2017-12-20	Self-referral to accident and emergency department (procedure)	Administration of medication (procedure)				Discharge to home (procedure)
Lower back injury (disorder)	injury of muscle of lower back (disorder)	64	Male	2017-12-20	Self-referral to accident and emergency department (procedure)			Plain radiography (procedure)	Plain radiography (procedure)	Discharge to home (procedure)
Lower back injury (disorder)	injury of muscle of lower back (disorder)	64	Male	2017-12-20	Self-referral to accident and emergency department (procedure)	Patient given written advice (situation)				Discharge to home (procedure)
Lower back injury (disorder)	osteoarthritis (disorder)	83	Female	2017-12-20	Self-referral to accident and emergency department (procedure)	Patient given written advice (situation)		Plain radiography (procedure)	Plain radiography (procedure)	Discharge to home (procedure)
Lower back injury (disorder)	patient walked out (finding)	21	Female	2017-12-20	Referral by out of hours service (procedure)	Patient given written advice (situation)				Discharge to home (procedure)
Lower back injury (disorder)	superficial injury of hip (disorder)	86	Female	2017-12-20	Self-referral to accident and emergency department (procedure)	New medication commenced (finding)	Patient given written advice (situation)	Plain radiography (procedure)	Plain radiography (procedure)	Discharge to home (procedure)
Upper back injury (disorder)		62	Male	2017-12-20	Self-referral to accident and emergency department (procedure)					Discharge to home (procedure)
Backache (finding)		65	Male	2017-12-21	Referred by hospital emergency department (finding)	Local anaesthesia (procedure)				Discharge to home (procedure)
Backache (finding)		69	Female	2017-12-21	Self-referral to accident and emergency department (procedure)	Cardiac monitor surveillance (regime/therapy)	Intravenous cannulation (procedure)	Plain radiography (procedure)	Plain radiography (procedure)	Discharge to home (procedure)
Backache (finding)	injury of muscle of lower back (disorder)	64	Male	2017-12-21	Self-referral to accident and emergency department (procedure)	Administration of medication (procedure)				Discharge to home (procedure)
Backache (finding)	lobar pneumonia (disorder)	73	Female	2017-12-21	Self-referral to accident and emergency department (procedure)	Patient given written advice (situation)	Cardiac monitor surveillance (regime/therapy)	Plain radiography (procedure)	Plain radiography (procedure)	Discharge to ward (procedure)
Lower back injury (disorder)		19	Female	2017-12-21	Self-referral to accident and emergency department (procedure)					Emergency department discharge to ambulatory emergency care service (procedure)
Lower back injury (disorder)		50	Male	2017-12-21	Self-referral to accident and emergency department (procedure)	Cardiac monitor surveillance (regime/therapy)				Discharge to home (procedure)
Lower back injury (disorder)		77	Female	2017-12-21	Referred by ambulance service (finding)	Patient given written advice (situation)		Plain radiography (procedure)	Plain radiography (procedure)	Discharge to home (procedure)
Lower back injury (disorder)	injury of muscle of lower back (disorder)	17	Female	2017-12-21	Self-referral to accident and emergency department (procedure)	Cardiac monitor surveillance (regime/therapy)	Intravenous cannulation (procedure)	Magnetic resonance imaging (procedure)	Magnetic resonance imaging (procedure)	Discharge to home (procedure)
Lower back injury (disorder)	patient walked out (finding)	34	Male	2017-12-21	Self-referral to accident and emergency department (procedure)	Patient given written advice (situation)				Discharge to home (procedure)
Backache (finding)		54	Female	2017-12-22	Self-referral to accident and emergency department (procedure)					Discharge to home (procedure)
Backache (finding)		76	Female	2017-12-22	Self-referral to accident and emergency department (procedure)					Discharge to home (procedure)
Backache (finding)		80	Male	2017-12-22	Self-referral to accident and emergency department (procedure)	Patient given written advice (situation)		Plain radiography (procedure)	Plain radiography (procedure)	Discharge to home (procedure)
Backache (finding)	injury of muscle of upper back (disorder)	59	Female	2017-12-22	Self-referral to accident and emergency department (procedure)			Plain radiography (procedure)	Plain radiography (procedure)	Discharge to home (procedure)
Backache (finding)	upper respiratory infection (disorder)	19	Female	2017-12-22	Referral by out of hours service (procedure)	Patient given written advice (situation)				Discharge to home (procedure)
Lower back injury (disorder)		69	Female	2017-12-22	Self-referral to accident and emergency department (procedure)					Discharge to home (procedure)
Lower back injury (disorder)		83	Female	2017-12-22	Referred by member of Primary Health Care Team (finding)	Patient given written advice (situation)		Blood coagulation panel (procedure)	Complete blood count (procedure)	Discharge to ward (procedure)
Lower back injury (disorder)	cauda equina syndrome (disorder)	31	Male	2017-12-22	Referred by National Health Service 111 service (finding)	Patient given written advice (situation)				Patient transfer, to another health care facility (procedure)
Lower back injury (disorder)	injury of muscle of upper back (disorder)	76	Female	2017-12-22	Self-referral to accident and emergency department (procedure)	Cardiac monitor surveillance (regime/therapy)		Plain radiography (procedure)	Plain radiography (procedure)	Discharge to home (procedure)
Lower back injury (disorder)	strain of neck muscle (disorder)	25	Male	2017-12-22	Self-referral to accident and emergency department (procedure)	Patient given written advice (situation)				Discharge to home (procedure)
Lower back injury (disorder)	superficial injury of pelvic region (disorder)	65	Male	2017-12-22	Referred by ambulance service (finding)	Patient given written advice (situation)		Computerized axial tomography (procedure)	Plain radiography (procedure)	Discharge to home (procedure)
Backache (finding)		30	Male	2017-12-23	Referred by National Health Service 111 service (finding)					Discharge to home (procedure)
Backache (finding)		50	Female	2017-12-23	Self-referral to accident and emergency department (procedure)					Emergency department discharge to ambulatory emergency care service (procedure)
Backache (finding)		51	Female	2017-12-23	Self-referral to accident and emergency department (procedure)					Emergency department discharge to ambulatory emergency care service (procedure)
Backache (finding)	urinary tract infectious disease (disorder)	73	Female	2017-12-23	Referred by National Health Service 111 service (finding)	Patient given written advice (situation)		Blood coagulation panel (procedure)	Complete blood count (procedure)	Discharge to ward (procedure)
Lower back injury (disorder)		20	Male	2017-12-23	Self-referral to accident and emergency department (procedure)	Patient given written advice (situation)				Discharge to home (procedure)
Lower back injury (disorder)	injury of muscle of lower back (disorder)	59	Female	2017-12-23	Self-referral to accident and emergency department (procedure)	Patient given written advice (situation)		Plain radiography (procedure)	Plain radiography (procedure)	Discharge to home (procedure)
Upper back injury (disorder)	closed fracture thoracic vertebra (disorder)	87	Female	2017-12-23	Self-referral to accident and emergency department (procedure)	Patient given written advice (situation)		Blood coagulation panel (procedure)	Complete blood count (procedure)	Discharge to home (procedure)
Backache (finding)		38	Female	2017-12-24	Self-referral to accident and emergency department (procedure)					Discharge to home (procedure)
Backache (finding)	sciatica (disorder)	32	Female	2017-12-24	Referral by out of hours service (procedure)	Administration of medication (procedure)				Discharge to home (procedure)
Backache (finding)	sciatica (disorder)	39	Male	2017-12-24	Self-referral to accident and emergency department (procedure)	Administration of medication (procedure)				Discharge to home (procedure)
Lower back injury (disorder)	patient walked out (finding)	39	Female	2017-12-24	Referred by police (finding)	Administration of medication (procedure)				Discharge to home (procedure)
Lower back injury (disorder)	sciatica (disorder)	39	Male	2017-12-24	Self-referral to accident and emergency department (procedure)	Patient given written advice (situation)				Discharge to home (procedure)
Lower back injury (disorder)	thoracic back sprain (disorder)	28	Female	2017-12-24	Self-referral to accident and emergency department (procedure)	Patient given written advice (situation)				Discharge to home (procedure)
Upper back injury (disorder)	closed fracture of rib (disorder)	86	Male	2017-12-24	Self-referral to accident and emergency department (procedure)	Administration of medication (procedure)		Complete blood count (procedure)	Blood coagulation panel (procedure)	Discharge to ward (procedure)
Backache (finding)	cauda equina syndrome (disorder)	57	Female	2017-12-25	Self-referral to accident and emergency department (procedure)	Patient given written advice (situation)	Intravenous cannulation (procedure)	Computerized axial tomography (procedure)	Computerized axial tomography (procedure)	Patient transfer, to another health care facility (procedure)
Backache (finding)	pyelonephritis (disorder)	76	Male	2017-12-25	Referred by National Health Service 111 service (finding)	Intravenous cannulation (procedure)	Intravenous antibiotic therapy (procedure)	Blood culture (procedure)	Blood coagulation panel (procedure)	Discharge to ward (procedure)
Lower back injury (disorder)		77	Male	2017-12-25	Referred by National Health Service 111 service (finding)	Patient given written advice (situation)	Intravenous cannulation (procedure)	Computerized axial tomography (procedure)	Computerized axial tomography (procedure)	Discharge to home (procedure)
Lower back injury (disorder)	closed fracture lumbar vertebra (disorder)	80	Male	2017-12-25	Referred by National Health Service 111 service (finding)	New medication commenced (finding)		Plain radiography (procedure)	Plain radiography (procedure)	Discharge to home (procedure)
Lower back injury (disorder)	injury of muscle of lower back (disorder)	81	Female	2017-12-25	Self-referral to accident and emergency department (procedure)	Administration of medication (procedure)		Plain radiography (procedure)	Plain radiography (procedure)	Discharge to home (procedure)
Lower back injury (disorder)	thoracic back sprain (disorder)	31	Female	2017-12-25	Self-referral to accident and emergency department (procedure)	Cardiac monitor surveillance (regime/therapy)	Administration of medication (procedure)	Blood coagulation panel (procedure)	Complete blood count (procedure)	Discharge to home (procedure)
Lower back injury (disorder)	urinary tract infectious disease (disorder)	88	Female	2017-12-25	Referred by National Health Service 111 service (finding)	Intravenous antibiotic therapy (procedure)		Blood coagulation panel (procedure)	Complete blood count (procedure)	Discharge to ward (procedure)
Backache (finding)		83	Female	2017-12-26	Referred by National Health Service 111 service (finding)					Discharge to home (procedure)
Backache (finding)	injury of muscle of lower back (disorder)	37	Female	2017-12-26	Self-referral to accident and emergency department (procedure)	Cardiac monitor surveillance (regime/therapy)	Nitrous oxide and oxygen gas analgesia (procedure)			Discharge to home (procedure)
Backache (finding)	injury of muscle of lower back (disorder)	66	Male	2017-12-26	Self-referral to accident and emergency department (procedure)	Cardiac monitor surveillance (regime/therapy)	Patient given written advice (situation)	Blood coagulation panel (procedure)	Complete blood count (procedure)	Discharge to home (procedure)
Backache (finding)	lobar pneumonia (disorder)	55	Female	2017-12-26	Referred by urgent care service (finding)	Intravenous cannulation (procedure)	Administration of intravenous fluids (procedure)	Plain radiography (procedure)	Plain radiography (procedure)	Discharge to ward (procedure)
Backache (finding)	sciatica (disorder)	79	Female	2017-12-26	Self-referral to accident and emergency department (procedure)	Patient given written advice (situation)		Plain radiography (procedure)	Plain radiography (procedure)	Discharge to home (procedure)
Backache (finding)	traumatic dislocation of shoulder region (disorder)	38	Female	2017-12-26	Self-referral to accident and emergency department (procedure)	Patient given written advice (situation)	Administration of medication (procedure)	Plain radiography (procedure)	Plain radiography (procedure)	Discharge to home (procedure)
Backache (finding)	urinary tract infectious disease (disorder)	68	Male	2017-12-26	Self-referral to accident and emergency department (procedure)	Administration of medication (procedure)		Plain radiography (procedure)	Plain radiography (procedure)	Discharge to home (procedure)
Lower back injury (disorder)		31	Male	2017-12-26	Self-referral to accident and emergency department (procedure)					Discharge to home (procedure)
Lower back injury (disorder)	closed fracture lumbar vertebra (disorder)	34	Male	2017-12-26	Self-referral to accident and emergency department (procedure)			Computerized axial tomography (procedure)	Computerized axial tomography (procedure)	Discharge to ward (procedure)
Lower back injury (disorder)	lumbar sprain (disorder)	55	Female	2017-12-26	Self-referral to accident and emergency department (procedure)	Patient given written advice (situation)				Discharge to home (procedure)
Lower back injury (disorder)	patient walked out (finding)	27	Female	2017-12-26	Self-referral to accident and emergency department (procedure)					Discharge to home (procedure)
Lower back injury (disorder)	strain of neck muscle (disorder)	34	Male	2017-12-26	Self-referral to accident and emergency department (procedure)	Oxygen therapy (procedure)	Cardiac monitor surveillance (regime/therapy)	Plain radiography (procedure)	Plain radiography (procedure)	Discharge to home (procedure)
Upper back injury (disorder)	superficial injury of neck (disorder)	83	Male	2017-12-26	Self-referral to accident and emergency department (procedure)	Patient given written advice (situation)		Plain radiography (procedure)	Plain radiography (procedure)	Discharge to home (procedure)
Upper back injury (disorder)	traumatic intracranial subdural hematoma (disorder)	95	Female	2017-12-26	Self-referral to accident and emergency department (procedure)	Patient given written advice (situation)		Computerized axial tomography (procedure)	Computerized axial tomography (procedure)	Discharge to home (procedure)
Backache (finding)		55	Female	2017-12-27	Self-referral to accident and emergency department (procedure)					Discharge to home (procedure)
Backache (finding)	cauda equina syndrome (disorder)	72	Male	2017-12-27	Self-referral to accident and emergency department (procedure)	Administration of medication (procedure)				Discharge to ward (procedure)
Backache (finding)	sciatica (disorder)	37	Female	2017-12-27	Self-referral to accident and emergency department (procedure)	Administration of medication (procedure)				Discharge to home (procedure)
Backache (finding)	sciatica (disorder)	56	Female	2017-12-27	Referred by member of Primary Health Care Team (finding)	Patient given written advice (situation)		Magnetic resonance imaging (procedure)	Magnetic resonance imaging (procedure)	Discharge to home (procedure)
Backache (finding)	superficial injury of back (disorder)	83	Female	2017-12-27	Referred by member of Primary Health Care Team (finding)	Patient given written advice (situation)				Discharge to ward (procedure)
Lower back injury (disorder)		37	Male	2017-12-27	Referred by police (finding)	Patient given written advice (situation)				Discharge to home (procedure)
Lower back injury (disorder)		37	Female	2017-12-27	Referred by member of Primary Health Care Team (finding)	Patient given written advice (situation)				Discharge to home (procedure)
Lower back injury (disorder)		44	Male	2017-12-27	Self-referral to accident and emergency department (procedure)					Discharge to home (procedure)
Lower back injury (disorder)		52	Female	2017-12-27	Self-referral to accident and emergency department (procedure)	Cardiac monitor surveillance (regime/therapy)		Urinalysis (procedure)		Discharge to home (procedure)
Lower back injury (disorder)		71	Male	2017-12-27	Self-referral to accident and emergency department (procedure)					Discharge to home (procedure)
Lower back injury (disorder)	injury of muscle of lower back (disorder)	64	Female	2017-12-27	Referred by member of Primary Health Care Team (finding)	Patient given written advice (situation)		Plain radiography (procedure)	Plain radiography (procedure)	Discharge to home (procedure)
Lower back injury (disorder)	patient walked out (finding)	47	Male	2017-12-27	Self-referral to accident and emergency department (procedure)	Patient given written advice (situation)				Discharge to home (procedure)
Lower back injury (disorder)	superficial injury of back (disorder)	61	Male	2017-12-27	Referred by ambulance service (finding)	Patient given written advice (situation)		Plain radiography (procedure)	Plain radiography (procedure)	Discharge to home (procedure)
Upper back injury (disorder)		24	Male	2017-12-27	Self-referral to accident and emergency department (procedure)					Discharge to home (procedure)
Backache (finding)		30	Female	2017-12-28	Self-referral to accident and emergency department (procedure)					Discharge to home (procedure)
Backache (finding)		48	Female	2017-12-28	Self-referral to accident and emergency department (procedure)
Backache (finding)		65	Female	2017-12-28	Self-referral to accident and emergency department (procedure)					Emergency department discharge to ambulatory emergency care service (procedure)
Backache (finding)		76	Male	2017-12-28	Referred by member of Primary Health Care Team (finding)					Discharge to home (procedure)
Lower back injury (disorder)		31	Female	2017-12-28	Self-referral to accident and emergency department (procedure)					Emergency department discharge to ambulatory emergency care service (procedure)
Lower back injury (disorder)	acute pulmonary edema (disorder)	93	Male	2017-12-28	Self-referral to accident and emergency department (procedure)			Complete blood count (procedure)	Blood coagulation panel (procedure)	Discharge to ward (procedure)
Lower back injury (disorder)	injury of muscle of lower back (disorder)	59	Male	2017-12-28	Self-referral to accident and emergency department (procedure)					Discharge to home (procedure)
Upper back injury (disorder)		59	Male	2017-12-28	Self-referral to accident and emergency department (procedure)					Discharge to home (procedure)
Upper back injury (disorder)		68	Female	2017-12-28	Referred by National Health Service 111 service (finding)	New medication commenced (finding)		Plain radiography (procedure)	Plain radiography (procedure)	Discharge to home (procedure)
Upper back injury (disorder)	strain of neck muscle (disorder)	17	Male	2017-12-28	Self-referral to accident and emergency department (procedure)	Administration of medication (procedure)	Cardiac monitor surveillance (regime/therapy)	Plain radiography (procedure)	Plain radiography (procedure)	Discharge to home (procedure)
Backache (finding)	injury of muscle of lower back (disorder)	35	Male	2017-12-29	Self-referral to accident and emergency department (procedure)	Administration of medication (procedure)	Patient given written advice (situation)			Discharge to home (procedure)
Backache (finding)	injury of muscle of lower back (disorder)	35	Male	2017-12-29	Self-referral to accident and emergency department (procedure)	Administration of medication (procedure)	New medication commenced (finding)			Discharge to home (procedure)
Backache (finding)	kidney disease (disorder)	25	Female	2017-12-29	Self-referral to accident and emergency department (procedure)	Administration of medication (procedure)		Computerized axial tomography (procedure)	Computerized axial tomography (procedure)	Discharge to home (procedure)
Backache (finding)	spinal cord injury (disorder)	75	Male	2017-12-29	Self-referral to accident and emergency department (procedure)	Administration of medication (procedure)		Magnetic resonance imaging (procedure)	Magnetic resonance imaging (procedure)	Discharge to ward (procedure)
Backache (finding)	urinary tract infectious disease (disorder)	65	Male	2017-12-29	Referred by ambulance service (finding)	New medication commenced (finding)		Urinalysis (procedure)		Discharge to home (procedure)
Lower back injury (disorder)	superficial injury of hip (disorder)	66	Female	2017-12-29	Self-referral to accident and emergency department (procedure)	Provision of mobility device (procedure)		Plain radiography (procedure)	Plain radiography (procedure)	Discharge to home (procedure)
Lower back injury (disorder)	ureteric stone (disorder)	66	Male	2017-12-29	Self-referral to accident and emergency department (procedure)	Patient given written advice (situation)		Computerized axial tomography (procedure)	Computerized axial tomography (procedure)	Discharge to home (procedure)
Backache (finding)		28	Female	2017-12-30	Self-referral to accident and emergency department (procedure)					Emergency department discharge to ambulatory emergency care service (procedure)
Backache (finding)	anal fissure (disorder)	47	Male	2017-12-30	Self-referral to accident and emergency department (procedure)	Patient given written advice (situation)		Blood coagulation panel (procedure)	Complete blood count (procedure)	Discharge to home (procedure)
Backache (finding)	chronic obstructive lung disease (disorder)	61	Female	2017-12-30	Referred by ambulance service (finding)	Administration of medication (procedure)	Intravenous antibiotic therapy (procedure)	Plain radiography (procedure)	Plain radiography (procedure)	Discharge to ward (procedure)
Backache (finding)	injury of muscle of lower back (disorder)	44	Male	2017-12-30	Self-referral to accident and emergency department (procedure)	New medication commenced (finding)				Discharge to home (procedure)
Backache (finding)	patient walked out (finding)	59	Male	2017-12-30	Self-referral to accident and emergency department (procedure)					Discharge to home (procedure)
Backache (finding)	sciatica (disorder)	57	Male	2017-12-30	Self-referral to accident and emergency department (procedure)	Administration of medication (procedure)	New medication commenced (finding)	Blood coagulation panel (procedure)	Complete blood count (procedure)	Discharge to home (procedure)
Backache (finding)	superficial injury of back (disorder)	40	Female	2017-12-30	Referred by National Health Service 111 service (finding)	Patient given written advice (situation)				Discharge to home (procedure)
Lower back injury (disorder)		55	Female	2017-12-30	Self-referral to accident and emergency department (procedure)	Patient given written advice (situation)				Discharge to home (procedure)
Lower back injury (disorder)	injury of muscle of lower back (disorder)	24	Female	2017-12-30	Self-referral to accident and emergency department (procedure)	Patient given written advice (situation)				Discharge to home (procedure)
Lower back injury (disorder)	injury of muscle of lower back (disorder)	75	Female	2017-12-30	Referred by National Health Service 111 service (finding)	Cardiac monitor surveillance (regime/therapy)		Plain radiography (procedure)	Plain radiography (procedure)	Discharge to home (procedure)
Lower back injury (disorder)	superficial injury of back (disorder)	50	Female	2017-12-30	Self-referral to accident and emergency department (procedure)	Patient given written advice (situation)				Discharge to home (procedure)
Lower back injury (disorder)	superficial injury of back (disorder)	93	Female	2017-12-30	Referred by National Health Service 111 service (finding)	Administration of medication (procedure)				Discharge to home (procedure)
Upper back injury (disorder)	superficial injury of head (disorder)	69	Male	2017-12-30	Self-referral to accident and emergency department (procedure)	Patient given written advice (situation)		Plain radiography (procedure)	Plain radiography (procedure)	Discharge to home (procedure)
Backache (finding)		36	Male	2017-12-31	Referred by National Health Service 111 service (finding)					Emergency department discharge to ambulatory emergency care service (procedure)
Backache (finding)	injury of muscle of lower back (disorder)	53	Male	2017-12-31	Self-referral to accident and emergency department (procedure)	Cardiac monitor surveillance (regime/therapy)	Patient given written advice (situation)	Complete blood count (procedure)	Urea and electrolytes (procedure)	Discharge to home (procedure)
Backache (finding)	injury of muscle of upper back (disorder)	44	Male	2017-12-31	Referral by out of hours service (procedure)			Blood coagulation panel (procedure)	Complete blood count (procedure)	Discharge to home (procedure)
Backache (finding)	lower respiratory tract infection (disorder)	59	Male	2017-12-31	Self-referral to accident and emergency department (procedure)	New medication commenced (finding)		Plain radiography (procedure)	Plain radiography (procedure)	Discharge to home (procedure)
Backache (finding)	lumbar sprain (disorder)	59	Male	2017-12-31	Self-referral to accident and emergency department (procedure)	Patient given written advice (situation)				Discharge to home (procedure)
Backache (finding)	urinary tract infectious disease (disorder)	18	Female	2017-12-31	Self-referral to accident and emergency department (procedure)	New medication commenced (finding)		Urinalysis (procedure)		Discharge to home (procedure)
Lower back injury (disorder)	closed fracture lumbar vertebra (disorder)	61	Female	2017-12-31	Self-referral to accident and emergency department (procedure)	Cardiac monitor surveillance (regime/therapy)		Computerized axial tomography (procedure)	Plain radiography (procedure)	Discharge to home (procedure)
Lower back injury (disorder)	lumbar sprain (disorder)	41	Male	2017-12-31	Self-referral to accident and emergency department (procedure)	Patient given written advice (situation)				Discharge to home (procedure)
Lower back injury (disorder)	superficial injury of neck (disorder)	31	Male	2017-12-31	Self-referral to accident and emergency department (procedure)			Plain radiography (procedure)	Plain radiography (procedure)	Discharge to home (procedure)
Backache (finding)		25	Male	2018-01-01	Referred by National Health Service 111 service (finding)	Patient given written advice (situation)		Plain radiography (procedure)	Plain radiography (procedure)	Discharge to home (procedure)
Backache (finding)	pyelonephritis (disorder)	64	Female	2018-01-01	Self-referral to accident and emergency department (procedure)	Administration of medication (procedure)	Intravenous cannulation (procedure)	Glucose measurement, blood, test strip (procedure)	Urinalysis (procedure)	Discharge to ward (procedure)
Lower back injury (disorder)	injury of muscle of lower back (disorder)	21	Female	2018-01-01	Referred by National Health Service 111 service (finding)	Patient given written advice (situation)				Discharge to home (procedure)
Lower back injury (disorder)	injury of muscle of lower back (disorder)	50	Female	2018-01-01	Self-referral to accident and emergency department (procedure)	New medication commenced (finding)	Patient given written advice (situation)			Discharge to home (procedure)
Lower back injury (disorder)	superficial injury of perineum (disorder)	48	Male	2018-01-01	Referred by National Health Service 111 service (finding)	New medication commenced (finding)	Patient given written advice (situation)			Discharge to home (procedure)
Lower back injury (disorder)	traumatic brain injury with no loss of consciousness (disorder)	80	Male	2018-01-01	Referred by ambulance service (finding)	Patient given written advice (situation)	Intravenous cannulation (procedure)	Glucose measurement, blood, test strip (procedure)	Complete blood count (procedure)	Discharge to ward (procedure)
Backache (finding)		51	Female	2018-01-02	Self-referral to accident and emergency department (procedure)					Discharge to home (procedure)
Lower back injury (disorder)		21	Male	2018-01-02	Self-referral to accident and emergency department (procedure)	Intravenous cannulation (procedure)	Administration of medication (procedure)	Complete blood count (procedure)	Urea and electrolytes (procedure)	Discharge to home (procedure)
Lower back injury (disorder)	closed fracture lumbar vertebra (disorder)	77	Female	2018-01-02	Self-referral to accident and emergency department (procedure)	Administration of medication (procedure)	Patient given written advice (situation)	Plain radiography (procedure)	Magnetic resonance imaging (procedure)	Discharge to home (procedure)
Lower back injury (disorder)	closed fracture pelvis, coccyx (disorder)	86	Male	2018-01-02	Referred by National Health Service 111 service (finding)	Patient given written advice (situation)				Discharge to home (procedure)
Lower back injury (disorder)	superficial injury of chest (disorder)	66	Male	2018-01-02	Self-referral to accident and emergency department (procedure)	Patient given written advice (situation)		Plain radiography (procedure)	Plain radiography (procedure)	Discharge to home (procedure)
Lower back injury (disorder)	traumatic brain injury with brief loss of consciousness (disorder)	92	Male	2018-01-02	Referred by carer (finding)	Cardiac monitor surveillance (regime/therapy)	Intravenous cannulation (procedure)	Complete blood count (procedure)	Hepatic function panel (procedure)	Discharge to ward (procedure)
Lower back injury (disorder)	traumatic brain injury with no loss of consciousness (disorder)	94	Male	2018-01-02	Referred by ambulance service (finding)	Patient given written advice (situation)	New medication commenced (finding)	Plain radiography (procedure)	Plain radiography (procedure)	Discharge to home (procedure)
Lower back injury (disorder)	urinary tract infectious disease (disorder)	78	Female	2018-01-02	Self-referral to accident and emergency department (procedure)	Patient given written advice (situation)	New medication commenced (finding)	Plain radiography (procedure)	Plain radiography (procedure)	Discharge to home (procedure)
Backache (finding)		41	Female	2018-01-03	Self-referral to accident and emergency department (procedure)					Discharge to home (procedure)
Backache (finding)		57	Male	2018-01-03	Self-referral to accident and emergency department (procedure)					Discharge to home (procedure)
Backache (finding)	injury of muscle of lower back (disorder)	31	Male	2018-01-03	Self-referral to accident and emergency department (procedure)	Administration of medication (procedure)		Plain radiography (procedure)	Plain radiography (procedure)	Discharge to home (procedure)
Backache (finding)	patient walked out (finding)	29	Female	2018-01-03	Referred by ambulance service (finding)	Patient given written advice (situation)				Discharge to home (procedure)
Lower back injury (disorder)		28	Female	2018-01-03	Self-referral to accident and emergency department (procedure)	Administration of medication (procedure)				Discharge to home (procedure)
Lower back injury (disorder)		44	Male	2018-01-03	Referred by National Health Service 111 service (finding)					Discharge to home (procedure)
Lower back injury (disorder)		45	Male	2018-01-03	Self-referral to accident and emergency department (procedure)	Patient given written advice (situation)		Plain radiography (procedure)	Plain radiography (procedure)	Discharge to home (procedure)
Lower back injury (disorder)		51	Female	2018-01-03	Self-referral to accident and emergency department (procedure)	Administration of medication (procedure)	Patient given written advice (situation)	Plain radiography (procedure)	Plain radiography (procedure)	Discharge to home (procedure)
Lower back injury (disorder)	injury of muscle of lower back (disorder)	45	Male	2018-01-03	Self-referral to accident and emergency department (procedure)	Patient given written advice (situation)				Discharge to home (procedure)
Lower back injury (disorder)	patient walked out (finding)	47	Male	2018-01-03	Self-referral to accident and emergency department (procedure)	Patient given written advice (situation)				Discharge to home (procedure)
Lower back injury (disorder)	Somatoform pain disorder (disorder)	18	Female	2018-01-03	Referred by National Health Service 111 service (finding)	Patient given written advice (situation)	Administration of medication (procedure)			Discharge to home (procedure)
Upper back injury (disorder)		31	Female	2018-01-03	Referred by National Health Service 111 service (finding)					Discharge to home (procedure)
Upper back injury (disorder)	closed fracture thoracic vertebra (disorder)	73	Female	2018-01-03	Referred by ambulance service (finding)	Cardiac monitor surveillance (regime/therapy)		Computerized axial tomography (procedure)	Computerized axial tomography (procedure)	Discharge to ward (procedure)
Backache (finding)		34	Female	2018-01-04	Self-referral to accident and emergency department (procedure)					Emergency department discharge to ambulatory emergency care service (procedure)
Backache (finding)		40	Male	2018-01-04	Self-referral to accident and emergency department (procedure)					Emergency department discharge to ambulatory emergency care service (procedure)
Backache (finding)		47	Male	2018-01-04	Referred by National Health Service 111 service (finding)					Emergency department discharge to ambulatory emergency care service (procedure)
Backache (finding)		68	Female	2018-01-04	Referred by member of Primary Health Care Team (finding)					Emergency department discharge to emergency department short stay ward (procedure)
Backache (finding)	patient walked out (finding)	38	Female	2018-01-04	Referred by National Health Service 111 service (finding)					Discharge to home (procedure)
Backache (finding)	patient walked out (finding)	38	Female	2018-01-04	Referred by National Health Service 111 service (finding)	Patient given written advice (situation)		Urea and electrolytes (procedure)	Blood coagulation panel (procedure)	Discharge to home (procedure)
Lower back injury (disorder)		17	Female	2018-01-04	Self-referral to accident and emergency department (procedure)	Patient given written advice (situation)				Discharge to home (procedure)
Lower back injury (disorder)		47	Female	2018-01-04	Referred by National Health Service 111 service (finding)	Patient given written advice (situation)				Discharge to home (procedure)
Lower back injury (disorder)		75	Female	2018-01-04	Referral by out of hours service (procedure)	Patient given written advice (situation)		Plain radiography (procedure)	Plain radiography (procedure)	Discharge to home (procedure)
Lower back injury (disorder)	injury of muscle of lower back (disorder)	51	Female	2018-01-04	Self-referral to accident and emergency department (procedure)	New medication commenced (finding)		Plain radiography (procedure)	Plain radiography (procedure)	Discharge to home (procedure)
Lower back injury (disorder)	sciatica (disorder)	55	Female	2018-01-04	Referred by member of Primary Health Care Team (finding)	Patient given written advice (situation)				Discharge to home (procedure)
Backache (finding)		20	Male	2018-01-05	Self-referral to accident and emergency department (procedure)					Emergency department discharge to ambulatory emergency care service (procedure)
Backache (finding)		20	Male	2018-01-05	Self-referral to accident and emergency department (procedure)					Discharge to home (procedure)
Backache (finding)		23	Female	2018-01-05	Self-referral to accident and emergency department (procedure)					Discharge to home (procedure)
Backache (finding)		27	Female	2018-01-05	Self-referral to accident and emergency department (procedure)					Discharge to home (procedure)
Backache (finding)		28	Female	2018-01-05	Referred by National Health Service 111 service (finding)					Discharge to home (procedure)
Backache (finding)		33	Female	2018-01-05	Self-referral to accident and emergency department (procedure)					Discharge to home (procedure)
Backache (finding)		53	Female	2018-01-05	Self-referral to accident and emergency department (procedure)	Cardiac monitor surveillance (regime/therapy)		Urinalysis (procedure)		Discharge to home (procedure)
Backache (finding)		55	Female	2018-01-05	Self-referral to accident and emergency department (procedure)	Patient given written advice (situation)				Discharge to home (procedure)
Backache (finding)	lumbar sprain (disorder)	55	Female	2018-01-05	Self-referral to accident and emergency department (procedure)	Patient given written advice (situation)				Discharge to home (procedure)
Lower back injury (disorder)	deep venous thrombosis (disorder)	65	Male	2018-01-05	Self-referral to accident and emergency department (procedure)	New medication commenced (finding)		C-reactive protein measurement (procedure)	Urea and electrolytes (procedure)	Discharge to home (procedure)
Lower back injury (disorder)	superficial injury of back (disorder)	82	Female	2018-01-05	Self-referral to accident and emergency department (procedure)	Cardiac monitor surveillance (regime/therapy)	Administration of medication (procedure)	Urea and electrolytes (procedure)	Hepatic function panel (procedure)	Discharge to home (procedure)
Lower back injury (disorder)	superficial injury of hip (disorder)	84	Female	2018-01-05	Referred by National Health Service 111 service (finding)	Administration of medication (procedure)	Cardiac monitor surveillance (regime/therapy)	Urea and electrolytes (procedure)	Blood coagulation panel (procedure)	Discharge to ward (procedure)
Lower back injury (disorder)	superficial injury of perineum (disorder)	38	Female	2018-01-05	Self-referral to accident and emergency department (procedure)	Administration of medication (procedure)		Urinalysis (procedure)	Human chorionic gonadotropin measurement (procedure)	Discharge to home (procedure)
Backache (finding)		39	Male	2018-01-06	Self-referral to accident and emergency department (procedure)					Discharge to home (procedure)
Backache (finding)		67	Male	2018-01-06	Self-referral to accident and emergency department (procedure)	Patient given written advice (situation)	Cardiac monitor surveillance (regime/therapy)	Electrocardiographic procedure (procedure)	Complete blood count (procedure)	Discharge to home (procedure)
Backache (finding)	cauda equina syndrome (disorder)	24	Male	2018-01-06	Self-referral to accident and emergency department (procedure)	Administration of medication (procedure)				Discharge to home (procedure)
Lower back injury (disorder)	injury of muscle of lower back (disorder)	43	Female	2018-01-06	Self-referral to accident and emergency department (procedure)			Plain radiography (procedure)	Plain radiography (procedure)	Discharge to home (procedure)
Lower back injury (disorder)	lumbar sprain (disorder)	66	Female	2018-01-06	Self-referral to accident and emergency department (procedure)	Patient given written advice (situation)		Plain radiography (procedure)	Plain radiography (procedure)	Discharge to home (procedure)
Lower back injury (disorder)	superficial injury of back (disorder)	48	Male	2018-01-06	Referred by National Health Service 111 service (finding)	Cardiac monitor surveillance (regime/therapy)	Administration of medication (procedure)	Urea and electrolytes (procedure)	C-reactive protein measurement (procedure)	Discharge to home (procedure)
Upper back injury (disorder)		21	Female	2018-01-06	Referred by ambulance service (finding)	Patient given written advice (situation)		Plain radiography (procedure)	Plain radiography (procedure)	Discharge to home (procedure)
Backache (finding)		48	Female	2018-01-07	Self-referral to accident and emergency department (procedure)					Discharge to home (procedure)
Backache (finding)		59	Female	2018-01-07	Referred by National Health Service 111 service (finding)					Discharge to home (procedure)
Backache (finding)	lumbar sprain (disorder)	53	Male	2018-01-07	Referred by National Health Service 111 service (finding)	Administration of medication (procedure)				Discharge to home (procedure)
Backache (finding)	superficial injury of back (disorder)	78	Female	2018-01-07	Referred by National Health Service 111 service (finding)	Intravenous cannulation (procedure)		Urea and electrolytes (procedure)	Blood coagulation panel (procedure)	Discharge to home (procedure)
Lower back injury (disorder)	strain of neck muscle (disorder)	18	Female	2018-01-07	Referred by National Health Service 111 service (finding)	Patient given written advice (situation)				Discharge to home (procedure)
Lower back injury (disorder)	strain of neck muscle (disorder)	19	Male	2018-01-07	Referred by National Health Service 111 service (finding)	Patient given written advice (situation)				Discharge to home (procedure)
Backache (finding)	patient walked out (finding)	23	Male	2018-01-08	Self-referral to accident and emergency department (procedure)					Discharge to home (procedure)
Backache (finding)	patient walked out (finding)	29	Male	2018-01-08	Self-referral to accident and emergency department (procedure)					Discharge to home (procedure)
Backache (finding)	sciatica (disorder)	38	Male	2018-01-08	Referred by National Health Service 111 service (finding)	Patient given written advice (situation)		Urinalysis (procedure)		Discharge to home (procedure)
Lower back injury (disorder)		39	Female	2018-01-08	Referred by National Health Service 111 service (finding)	Patient given written advice (situation)				Discharge to home (procedure)
Lower back injury (disorder)	superficial injury of chest (disorder)	86	Male	2018-01-08	Referred by member of Primary Health Care Team (finding)	Patient given written advice (situation)	New medication commenced (finding)	Complete blood count (procedure)	Urea and electrolytes (procedure)	Discharge to home (procedure)
Lower back injury (disorder)	superficial injury of knee (disorder)	32	Male	2018-01-08	Self-referral to accident and emergency department (procedure)	Patient given written advice (situation)		Plain radiography (procedure)	Plain radiography (procedure)	Discharge to home (procedure)
Backache (finding)		28	Male	2018-01-09	Self-referral to accident and emergency department (procedure)					Discharge to home (procedure)
Backache (finding)		31	Male	2018-01-09	Self-referral to accident and emergency department (procedure)					Discharge to home (procedure)
Backache (finding)		46	Male	2018-01-09	Referral by out of hours service (procedure)					Discharge to home (procedure)
Backache (finding)		84	Male	2018-01-09	Self-referral to accident and emergency department (procedure)					Discharge to home (procedure)
Backache (finding)	disorder of nervous system (disorder)	44	Female	2018-01-09	Referred by member of Primary Health Care Team (finding)	Administration of medication (procedure)	Cardiac monitor surveillance (regime/therapy)	Complete blood count (procedure)	Urea and electrolytes (procedure)	Discharge to home (procedure)
Backache (finding)	injury of muscle of lower back (disorder)	42	Female	2018-01-09	Self-referral to accident and emergency department (procedure)	Cardiac monitor surveillance (regime/therapy)	Cardiac monitor surveillance (regime/therapy)			Discharge to home (procedure)
Backache (finding)	patient walked out (finding)	67	Female	2018-01-09	Referred by member of Primary Health Care Team (finding)	Patient given written advice (situation)				Discharge to home (procedure)
Lower back injury (disorder)		27	Male	2018-01-09	Self-referral to accident and emergency department (procedure)					Discharge to home (procedure)
Lower back injury (disorder)	superficial injury of chest (disorder)	44	Male	2018-01-09	Self-referral to accident and emergency department (procedure)	Administration of medication (procedure)		Plain radiography (procedure)	Plain radiography (procedure)	Discharge to home (procedure)
Backache (finding)		40	Male	2018-01-10	Self-referral to accident and emergency department (procedure)					Discharge to home (procedure)
Backache (finding)		47	Female	2018-01-10	Self-referral to accident and emergency department (procedure)					Discharge to home (procedure)
Backache (finding)		59	Male	2018-01-10	Referred by National Health Service 111 service (finding)					Discharge to home (procedure)
Backache (finding)	injury of muscle of lower back (disorder)	48	Female	2018-01-10	Self-referral to accident and emergency department (procedure)	Patient given written advice (situation)				Discharge to home (procedure)
Backache (finding)	sciatica (disorder)	39	Male	2018-01-10	Self-referral to accident and emergency department (procedure)	Patient given written advice (situation)				Discharge to home (procedure)
Lower back injury (disorder)		21	Male	2018-01-10	Self-referral to accident and emergency department (procedure)	Patient given written advice (situation)				Discharge to home (procedure)
Lower back injury (disorder)		26	Male	2018-01-10	Self-referral to accident and emergency department (procedure)					Discharge to home (procedure)
Lower back injury (disorder)		30	Male	2018-01-10	Self-referral to accident and emergency department (procedure)	Patient given written advice (situation)				Discharge to home (procedure)
Lower back injury (disorder)	conjunctivitis (disorder)	53	Female	2018-01-10	Referred by National Health Service 111 service (finding)	Administration of medication (procedure)				Discharge to home (procedure)
Lower back injury (disorder)	injury of muscle of lower back (disorder)	34	Male	2018-01-10	Self-referral to accident and emergency department (procedure)	Administration of medication (procedure)				Discharge to home (procedure)
Lower back injury (disorder)	lumbar sprain (disorder)	27	Female	2018-01-10	Self-referral to accident and emergency department (procedure)	Patient given written advice (situation)		Plain radiography (procedure)	Plain radiography (procedure)	Discharge to home (procedure)
Lower back injury (disorder)	lumbar sprain (disorder)	73	9	2018-01-10	Referred by ambulance service (finding)	Patient given written advice (situation)	New medication commenced (finding)			Discharge to home (procedure)
Lower back injury (disorder)	patient walked out (finding)	26	Male	2018-01-10	Self-referral to accident and emergency department (procedure)	Patient given written advice (situation)				Discharge to home (procedure)
Lower back injury (disorder)	tonic-clonic epilepsy (disorder)	49	Female	2018-01-10	Self-referral to accident and emergency department (procedure)	Cardiac monitor surveillance (regime/therapy)	Intravenous cannulation (procedure)	Electrocardiographic procedure (procedure)	Glucose measurement, blood, test strip (procedure)	Discharge to ward (procedure)
Upper back injury (disorder)		20	Female	2018-01-10	Self-referral to accident and emergency department (procedure)					Discharge to home (procedure)
Upper back injury (disorder)		23	Female	2018-01-10	Referred by ambulance service (finding)					Discharge to home (procedure)
Backache (finding)		48	Male	2018-01-11	Self-referral to accident and emergency department (procedure)					Discharge to home (procedure)
Backache (finding)		54	Male	2018-01-11	Self-referral to accident and emergency department (procedure)					Discharge to home (procedure)
Backache (finding)		72	Female	2018-01-11	Self-referral to accident and emergency department (procedure)
Backache (finding)		83	Female	2018-01-11	Self-referral to accident and emergency department (procedure)	Cardiac monitor surveillance (regime/therapy)		Urinalysis (procedure)	Urea and electrolytes (procedure)	Discharge to home (procedure)
Backache (finding)	acute coronary syndrome (disorder)	68	Female	2018-01-11	Referred by hospital outpatient department (finding)	Cardiac monitor surveillance (regime/therapy)	Intravenous cannulation (procedure)	Urea and electrolytes (procedure)	Blood coagulation panel (procedure)	Discharge to ward (procedure)
Backache (finding)	pyelonephritis (disorder)	61	Female	2018-01-11	Referred by member of Primary Health Care Team (finding)					Discharge to ward (procedure)
Lower back injury (disorder)	sciatica (disorder)	39	Female	2018-01-11	Self-referral to accident and emergency department (procedure)	New medication commenced (finding)				Discharge to home (procedure)
Backache (finding)		54	Female	2018-01-12	Referred by member of Primary Health Care Team (finding)	Administration of medication (procedure)				Discharge to home (procedure)
Backache (finding)	injury of muscle of lower back (disorder)	22	Female	2018-01-12	Self-referral to accident and emergency department (procedure)	Administration of medication (procedure)				Discharge to home (procedure)
Lower back injury (disorder)		17	Male	2018-01-12	Referred by National Health Service 111 service (finding)					Discharge to home (procedure)
Lower back injury (disorder)		18	Female	2018-01-12	Self-referral to accident and emergency department (procedure)					Discharge to home (procedure)
Lower back injury (disorder)	injury of muscle of lower back (disorder)	35	Female	2018-01-12	Referred by urgent care service (finding)	Administration of medication (procedure)				Discharge to home (procedure)
Lower back injury (disorder)	lumbar sprain (disorder)	39	Male	2018-01-12	Self-referral to accident and emergency department (procedure)	Patient given written advice (situation)		Plain radiography (procedure)	Plain radiography (procedure)	Discharge to home (procedure)
Lower back injury (disorder)	patient walked out (finding)	33	Male	2018-01-12	Self-referral to accident and emergency department (procedure)					Discharge to home (procedure)
Backache (finding)		25	Male	2018-01-13	Self-referral to accident and emergency department (procedure)					Discharge to home (procedure)
Backache (finding)		36	Female	2018-01-13	Referred by National Health Service 111 service (finding)					Discharge to home (procedure)
Backache (finding)		49	Male	2018-01-13	Self-referral to accident and emergency department (procedure)					Discharge to home (procedure)
Backache (finding)	incisional hernia (disorder)	72	Male	2018-01-13	Self-referral to accident and emergency department (procedure)			Blood coagulation panel (procedure)	C-reactive protein measurement (procedure)	Discharge to home (procedure)
Backache (finding)	injury of muscle of lower back (disorder)	18	Female	2018-01-13	Self-referral to accident and emergency department (procedure)	Administration of medication (procedure)				Discharge to home (procedure)
Backache (finding)	injury of muscle of lower back (disorder)	31	Female	2018-01-13	Referred by ambulance service (finding)	Patient given written advice (situation)	Administration of medication (procedure)			Discharge to home (procedure)
Backache (finding)	social problem (finding)	73	Male	2018-01-13	Referred by community nurse (finding)	Cardiac monitor surveillance (regime/therapy)	Patient given written advice (situation)			Patient transfer, to another health care facility (procedure)
Lower back injury (disorder)	closed fracture of clavicle (disorder)	27	Male	2018-01-13	Self-referral to accident and emergency department (procedure)	Patient given written advice (situation)	Application of sling (procedure)	Plain radiography (procedure)	Plain radiography (procedure)	Discharge to home (procedure)
Lower back injury (disorder)	kidney disease (disorder)	83	Male	2018-01-13	Referred by ambulance service (finding)	Cardiac monitor surveillance (regime/therapy)		Plain radiography (procedure)		Discharge to ward (procedure)
Lower back injury (disorder)	strain of neck muscle (disorder)	26	Male	2018-01-13	Self-referral to accident and emergency department (procedure)	New medication commenced (finding)				Discharge to home (procedure)
Lower back injury (disorder)	superficial injury of abdominal wall (disorder)	18	Male	2018-01-13	Referred by ambulance service (finding)	Administration of medication (procedure)		Complete blood count (procedure)	Urea and electrolytes (procedure)	Discharge to ward (procedure)
Backache (finding)		20	Female	2018-01-14	Self-referral to accident and emergency department (procedure)			Urinalysis (procedure)	Human chorionic gonadotropin measurement (procedure)	Discharge to home (procedure)
Backache (finding)		30	Female	2018-01-14	Self-referral to accident and emergency department (procedure)					Discharge to home (procedure)
Backache (finding)		31	Male	2018-01-14	Self-referral to accident and emergency department (procedure)					Discharge to home (procedure)
Backache (finding)		52	Male	2018-01-14	Self-referral to accident and emergency department (procedure)					Emergency department discharge to ambulatory emergency care service (procedure)
Backache (finding)	costal chondritis (disorder)	26	Male	2018-01-14	Self-referral to accident and emergency department (procedure)	New medication commenced (finding)		Blood coagulation panel (procedure)	C-reactive protein measurement (procedure)	Discharge to home (procedure)
Backache (finding)	injury of muscle of lower back (disorder)	38	Female	2018-01-14	Self-referral to accident and emergency department (procedure)	Patient given written advice (situation)	Administration of medication (procedure)	Plain radiography (procedure)	Plain radiography (procedure)	Discharge to home (procedure)
Lower back injury (disorder)	closed fracture of rib (disorder)	20	Female	2018-01-14	Self-referral to accident and emergency department (procedure)	Administration of medication (procedure)	Administration of medication (procedure)	Plain radiography (procedure)	Plain radiography (procedure)	Discharge to home (procedure)
Lower back injury (disorder)	closed fracture pelvis, coccyx (disorder)	41	Male	2018-01-14	Self-referral to accident and emergency department (procedure)	Patient given written advice (situation)	New medication commenced (finding)			Discharge to home (procedure)
Lower back injury (disorder)	injury of muscle of lower back (disorder)	19	Female	2018-01-14	Self-referral to accident and emergency department (procedure)	Patient given written advice (situation)	New medication commenced (finding)			Discharge to home (procedure)
Lower back injury (disorder)	injury of muscle of lower back (disorder)	62	Male	2018-01-14	Referred by urgent care service (finding)	Patient given written advice (situation)	New medication commenced (finding)	Electrocardiographic procedure (procedure)		Discharge to home (procedure)
Lower back injury (disorder)	superficial injury of back (disorder)	61	Male	2018-01-14	Self-referral to accident and emergency department (procedure)	Patient given written advice (situation)	Administration of medication (procedure)			Discharge to home (procedure)
Upper back injury (disorder)		52	Female	2018-01-14	Referred by ambulance service (finding)	Patient given written advice (situation)	Infusion of drug or medicament via intravenous route (procedure)	Complete blood count (procedure)	Blood coagulation panel (procedure)	Discharge to home (procedure)
Backache (finding)		31	Female	2018-01-15	Referred by hospital emergency department (finding)	Patient given written advice (situation)				Discharge to home (procedure)
Backache (finding)		48	Male	2018-01-15	Referred by member of Primary Health Care Team (finding)	Patient given written advice (situation)		Magnetic resonance imaging (procedure)
Backache (finding)		48	Male	2018-01-15	Self-referral to accident and emergency department (procedure)	Patient given written advice (situation)				Discharge to home (procedure)
Backache (finding)		53	Male	2018-01-15	Self-referral to accident and emergency department (procedure)					Emergency department discharge to ambulatory emergency care service (procedure)
Backache (finding)		61	Male	2018-01-15	Self-referral to accident and emergency department (procedure)					Discharge to home (procedure)
Lower back injury (disorder)	acetaminophen overdose (disorder)	48	Male	2018-01-15	Self-referral to accident and emergency department (procedure)					Discharge to home (procedure)
Lower back injury (disorder)	closed fracture of rib (disorder)	50	Male	2018-01-15	Referral by out of hours service (procedure)	Patient given written advice (situation)				Discharge to home (procedure)
Lower back injury (disorder)	fracture of pubic rami (disorder)	91	Female	2018-01-15	Referred by ambulance service (finding)	Patient given written advice (situation)	Administration of medication (procedure)	C-reactive protein measurement (procedure)	Complete blood count (procedure)	Patient transfer, to another health care facility (procedure)
Lower back injury (disorder)	injury of muscle of lower back (disorder)	42	Male	2018-01-15	Self-referral to accident and emergency department (procedure)	Administration of medication (procedure)				Discharge to home (procedure)
Lower back injury (disorder)	patient walked out (finding)	26	Male	2018-01-15	Referred by member of Primary Health Care Team (finding)	Patient given written advice (situation)
Backache (finding)		18	Female	2018-01-16	Self-referral to accident and emergency department (procedure)					Discharge to home (procedure)
Backache (finding)		51	Female	2018-01-16	Referred by National Health Service 111 service (finding)	Patient given written advice (situation)				Discharge to home (procedure)
Backache (finding)	sciatica (disorder)	36	Female	2018-01-16	Self-referral to accident and emergency department (procedure)	Administration of medication (procedure)				Discharge to home (procedure)
Backache (finding)	upper respiratory infection (disorder)	23	Female	2018-01-16	Referred by National Health Service 111 service (finding)	New medication commenced (finding)		Urea and electrolytes (procedure)	C-reactive protein measurement (procedure)	Discharge to home (procedure)
Backache (finding)	ureteric stone (disorder)	26	Male	2018-01-16	Referral by out of hours service (procedure)	Cardiac monitor surveillance (regime/therapy)		Urea and electrolytes (procedure)	Blood coagulation panel (procedure)	Discharge to home (procedure)
Lower back injury (disorder)		95	Female	2018-01-16	Referred by carer (finding)	Administration of medication (procedure)		Plain radiography (procedure)	Plain radiography (procedure)	Discharge to home (procedure)
Lower back injury (disorder)	closed fracture thoracic vertebra (disorder)	32	Male	2018-01-16	Referred by hospital emergency department (finding)	Patient given written advice (situation)		Computerized axial tomography (procedure)	Computerized axial tomography (procedure)	Discharge to home (procedure)
Lower back injury (disorder)	fracture of pubic rami (disorder)	61	Female	2018-01-16	Self-referral to accident and emergency department (procedure)	Cardiac monitor surveillance (regime/therapy)		Urea and electrolytes (procedure)	Hepatic function panel (procedure)	Discharge to ward (procedure)
Lower back injury (disorder)	injury of muscle of lower back (disorder)	83	Female	2018-01-16	Self-referral to accident and emergency department (procedure)	New medication commenced (finding)	Patient given written advice (situation)			Discharge to home (procedure)
Lower back injury (disorder)	injury of muscle of shoulder (disorder)	22	Female	2018-01-16	Self-referral to accident and emergency department (procedure)	Patient given written advice (situation)		Plain radiography (procedure)	Plain radiography (procedure)	Discharge to home (procedure)
Upper back injury (disorder)		39	Female	2018-01-16	Self-referral to accident and emergency department (procedure)					Discharge to home (procedure)
Backache (finding)		28	Female	2018-01-17	Self-referral to accident and emergency department (procedure)					Discharge to home (procedure)
Backache (finding)		39	Male	2018-01-17	Self-referral to accident and emergency department (procedure)	Cardiac monitor surveillance (regime/therapy)				Discharge to home (procedure)
Backache (finding)		40	Female	2018-01-17	Self-referral to accident and emergency department (procedure)					Discharge to home (procedure)
Backache (finding)		57	Male	2018-01-17	Self-referral to accident and emergency department (procedure)					Discharge to home (procedure)
Backache (finding)		67	Male	2018-01-17	Self-referral to accident and emergency department (procedure)					Discharge to home (procedure)
Backache (finding)		90	Female	2018-01-17	Referred by carer (finding)	Cardiac monitor surveillance (regime/therapy)	Intravenous cannulation (procedure)	Urea and electrolytes (procedure)	Urea and electrolytes (procedure)	Discharge to home (procedure)
Backache (finding)	disorder of nervous system (disorder)	35	Female	2018-01-17	Referred by member of Primary Health Care Team (finding)	Patient given written advice (situation)	New medication commenced (finding)			Discharge to home (procedure)
Backache (finding)	injury of muscle of lower back (disorder)	60	Male	2018-01-17	Referred by member of Primary Health Care Team (finding)	Patient given written advice (situation)				Discharge to home (procedure)
Lower back injury (disorder)		24	Female	2018-01-17	Self-referral to accident and emergency department (procedure)					Emergency department discharge to emergency department short stay ward (procedure)
Backache (finding)		32	Male	2018-01-18	Self-referral to accident and emergency department (procedure)	Patient given written advice (situation)				Discharge to home (procedure)
Backache (finding)		33	Male	2018-01-18	Self-referral to accident and emergency department (procedure)					Discharge to home (procedure)
Backache (finding)		34	Female	2018-01-18	Self-referral to accident and emergency department (procedure)					Discharge to home (procedure)
Backache (finding)		37	Female	2018-01-18	Self-referral to accident and emergency department (procedure)	Patient given written advice (situation)				Discharge to home (procedure)
Backache (finding)		42	Female	2018-01-18	Self-referral to accident and emergency department (procedure)	Patient given written advice (situation)				Discharge to home (procedure)
Backache (finding)		61	Female	2018-01-18	Referred by National Health Service 111 service (finding)			Urinalysis (procedure)	Computerized axial tomography (procedure)	Discharge to home (procedure)
Lower back injury (disorder)		28	Male	2018-01-18	Referred by member of Primary Health Care Team (finding)
Lower back injury (disorder)		58	Female	2018-01-18	Self-referral to accident and emergency department (procedure)	Administration of medication (procedure)				Discharge to home (procedure)
Lower back injury (disorder)	cerebrovascular accident (disorder)	59	Female	2018-01-18	Self-referral to accident and emergency department (procedure)			Urea and electrolytes (procedure)	Blood coagulation panel (procedure)	Discharge to ward (procedure)
Lower back injury (disorder)	injury of muscle of lower back (disorder)	27	Male	2018-01-18	Self-referral to accident and emergency department (procedure)	Patient given written advice (situation)	New medication commenced (finding)	Plain radiography (procedure)	Plain radiography (procedure)	Discharge to home (procedure)
Upper back injury (disorder)	injury of muscle of lower back (disorder)	80	Male	2018-01-18	Self-referral to accident and emergency department (procedure)	Patient given written advice (situation)		Plain radiography (procedure)	Plain radiography (procedure)
Backache (finding)	injury of muscle of lower back (disorder)	29	Female	2018-01-19	Self-referral to accident and emergency department (procedure)	Patient given written advice (situation)				Discharge to home (procedure)
Backache (finding)	injury of muscle of lower back (disorder)	58	Male	2018-01-19	Self-referral to accident and emergency department (procedure)	New medication commenced (finding)				Discharge to home (procedure)
Backache (finding)	sciatica (disorder)	40	Female	2018-01-19	Referred by National Health Service 111 service (finding)	Administration of medication (procedure)		Magnetic resonance imaging (procedure)	Magnetic resonance imaging (procedure)	Discharge to home (procedure)
Backache (finding)	vasovagal syncope (disorder)	26	Female	2018-01-19	Referred by National Health Service 111 service (finding)	Patient given written advice (situation)		Blood coagulation panel (procedure)	Complete blood count (procedure)	Discharge to home (procedure)
Lower back injury (disorder)		49	Male	2018-01-19	Self-referral to accident and emergency department (procedure)	Patient given written advice (situation)				Discharge to home (procedure)
Lower back injury (disorder)		56	Female	2018-01-19	Self-referral to accident and emergency department (procedure)	Administration of medication (procedure)		Plain radiography (procedure)	Plain radiography (procedure)	Discharge to home (procedure)
Lower back injury (disorder)	closed fracture of waist of scaphoid bone (disorder)	71	Female	2018-01-19	Self-referral to accident and emergency department (procedure)	Patient given written advice (situation)	Apply Thomas splint traction (procedure)	Plain radiography (procedure)	Plain radiography (procedure)	Discharge to home (procedure)
Lower back injury (disorder)	closed fracture thoracic vertebra (disorder)	31	Male	2018-01-19	Self-referral to accident and emergency department (procedure)	Cardiac monitor surveillance (regime/therapy)	Administration of medication (procedure)	Plain radiography (procedure)	Plain radiography (procedure)	Discharge to home (procedure)
Lower back injury (disorder)	injury of muscle of lower back (disorder)	29	Male	2018-01-19	Self-referral to accident and emergency department (procedure)	Administration of medication (procedure)	Administration of medication (procedure)			Discharge to home (procedure)
Lower back injury (disorder)	injury of muscle of lower back (disorder)	57	Male	2018-01-19	Self-referral to accident and emergency department (procedure)	Administration of medication (procedure)				Discharge to home (procedure)
Lower back injury (disorder)	injury of muscle of shoulder (disorder)	49	Female	2018-01-19	Self-referral to accident and emergency department (procedure)	Patient given written advice (situation)				Discharge to home (procedure)
Lower back injury (disorder)	injury of muscle of upper back (disorder)	65	Female	2018-01-19	Self-referral to accident and emergency department (procedure)	Administration of medication (procedure)		Plain radiography (procedure)	Plain radiography (procedure)	Discharge to home (procedure)
Lower back injury (disorder)	urinary tract infectious disease (disorder)	55	Female	2018-01-19	Self-referral to accident and emergency department (procedure)	Administration of medication (procedure)		C-reactive protein measurement (procedure)	Complete blood count (procedure)	Discharge to home (procedure)
Lower back injury (disorder)	vasovagal syncope (disorder)	69	Male	2018-01-19	Self-referral to accident and emergency department (procedure)	Administration of medication (procedure)	Patient given written advice (situation)	Urea and electrolytes (procedure)	Blood coagulation panel (procedure)	Discharge to ward (procedure)
Upper back injury (disorder)		52	Male	2018-01-19	Self-referral to accident and emergency department (procedure)	Patient given written advice (situation)		Plain radiography (procedure)	Plain radiography (procedure)	Discharge to home (procedure)
Backache (finding)		78	Female	2018-01-20	Referred by ambulance service (finding)	Patient given written advice (situation)		Plain radiography (procedure)	Plain radiography (procedure)	Discharge to home (procedure)
Backache (finding)	lumbar sprain (disorder)	45	Male	2018-01-20	Self-referral to accident and emergency department (procedure)	Patient given written advice (situation)				Discharge to home (procedure)
Backache (finding)	patient walked out (finding)	19	Female	2018-01-20	Referred by National Health Service 111 service (finding)			Urinalysis (procedure)		Discharge to home (procedure)
Injury of cervical region of back (disorder)	strain of neck muscle (disorder)	35	Female	2018-01-20	Self-referral to accident and emergency department (procedure)			Plain radiography (procedure)	Plain radiography (procedure)	Discharge to home (procedure)
Lower back injury (disorder)		20	Female	2018-01-20	Self-referral to accident and emergency department (procedure)	Patient given written advice (situation)				Discharge to ward (procedure)
Lower back injury (disorder)		30	Male	2018-01-20	Self-referral to accident and emergency department (procedure)	New medication commenced (finding)		Plain radiography (procedure)	Plain radiography (procedure)	Discharge to home (procedure)
Lower back injury (disorder)		45	Female	2018-01-20	Self-referral to accident and emergency department (procedure)	Administration of medication (procedure)				Discharge to home (procedure)
Lower back injury (disorder)		54	Female	2018-01-20	Referred by carer (finding)	Administration of medication (procedure)		Urea and electrolytes (procedure)	Urea and electrolytes (procedure)	Discharge to home (procedure)
Lower back injury (disorder)		60	Male	2018-01-20	Self-referral to accident and emergency department (procedure)					Emergency department discharge to ambulatory emergency care service (procedure)
Lower back injury (disorder)		62	Female	2018-01-20	Self-referral to accident and emergency department (procedure)					Emergency department discharge to ambulatory emergency care service (procedure)
Lower back injury (disorder)	superficial injury of back (disorder)	22	Female	2018-01-20	Self-referral to accident and emergency department (procedure)	Patient given written advice (situation)				Discharge to home (procedure)
Upper back injury (disorder)	closed fracture of rib (disorder)	45	Female	2018-01-20	Self-referral to accident and emergency department (procedure)	New medication commenced (finding)	Patient given written advice (situation)			Discharge to home (procedure)
Backache (finding)	cauda equina syndrome (disorder)	45	Female	2018-01-21	Self-referral to accident and emergency department (procedure)	Cardiac monitor surveillance (regime/therapy)				Patient transfer, to another health care facility (procedure)
Backache (finding)	injury of muscle of lower back (disorder)	34	Male	2018-01-21	Self-referral to accident and emergency department (procedure)					Discharge to home (procedure)
Backache (finding)	injury of muscle of lower back (disorder)	49	Male	2018-01-21	Self-referral to accident and emergency department (procedure)	Cardiac monitor surveillance (regime/therapy)				Discharge to home (procedure)
Backache (finding)	injury of muscle of lower back (disorder)	51	Male	2018-01-21	Referred by ambulance service (finding)	Cardiac monitor surveillance (regime/therapy)	Administration of medication (procedure)			Discharge to home (procedure)
Backache (finding)	injury of muscle of lower back (disorder)	72	Male	2018-01-21	Referred by National Health Service 111 service (finding)					Discharge to home (procedure)
Backache (finding)	referral to general practitioner (procedure)	69	Female	2018-01-21	Self-referral to accident and emergency department (procedure)	Patient given written advice (situation)				Discharge to home (procedure)
Backache (finding)	sciatica (disorder)	33	Male	2018-01-21	Self-referral to accident and emergency department (procedure)	Patient given written advice (situation)				Discharge to home (procedure)
Lower back injury (disorder)	injury of muscle of lower back (disorder)	43	Male	2018-01-21	Self-referral to accident and emergency department (procedure)	New medication commenced (finding)				Discharge to home (procedure)
Lower back injury (disorder)	injury of muscle of upper back (disorder)	51	Male	2018-01-21	Self-referral to accident and emergency department (procedure)					Discharge to home (procedure)
Lower back injury (disorder)	sciatica (disorder)	22	Male	2018-01-21	Self-referral to accident and emergency department (procedure)					Discharge to home (procedure)
Lower back injury (disorder)	superficial injury of back (disorder)	72	Male	2018-01-21	Referred by ambulance service (finding)	Patient given written advice (situation)				Discharge to home (procedure)
Backache (finding)		25	Male	2018-01-22	Self-referral to accident and emergency department (procedure)					Discharge to home (procedure)
Backache (finding)		28	Female	2018-01-22	Self-referral to accident and emergency department (procedure)					Emergency department discharge to ambulatory emergency care service (procedure)
Backache (finding)		30	Male	2018-01-22	Self-referral to accident and emergency department (procedure)	Cardiac monitor surveillance (regime/therapy)				Discharge to home (procedure)
Backache (finding)		34	Male	2018-01-22	Self-referral to accident and emergency department (procedure)
Backache (finding)		45	Male	2018-01-22	Self-referral to accident and emergency department (procedure)
Backache (finding)		60	Female	2018-01-22	Self-referral to accident and emergency department (procedure)					Emergency department discharge to ambulatory emergency care service (procedure)
Backache (finding)	injury of muscle of lower back (disorder)	49	Male	2018-01-22	Self-referral to accident and emergency department (procedure)	Administration of medication (procedure)				Discharge to home (procedure)
Backache (finding)	lumbar sprain (disorder)	23	Male	2018-01-22	Referred by member of Primary Health Care Team (finding)	Patient given written advice (situation)				Discharge to home (procedure)
Backache (finding)	sprain of hip (disorder)	20	Female	2018-01-22	Self-referral to accident and emergency department (procedure)	Administration of medication (procedure)				Discharge to ward (procedure)
Lower back injury (disorder)		30	Female	2018-01-22	Self-referral to accident and emergency department (procedure)	Patient given written advice (situation)				Discharge to home (procedure)
Lower back injury (disorder)		54	Female	2018-01-22	Self-referral to accident and emergency department (procedure)					Discharge to home (procedure)
Lower back injury (disorder)	injury of muscle of lower back (disorder)	32	Female	2018-01-22	Self-referral to accident and emergency department (procedure)	Patient given written advice (situation)				Discharge to home (procedure)
Lower back injury (disorder)	patient walked out (finding)	49	Male	2018-01-22	Self-referral to accident and emergency department (procedure)	Patient given written advice (situation)				Discharge to home (procedure)
Lower back injury (disorder)	superficial injury of back (disorder)	44	Male	2018-01-22	Self-referral to accident and emergency department (procedure)	Patient given written advice (situation)	New medication commenced (finding)			Discharge to home (procedure)
Lower back injury (disorder)	superficial injury of neck (disorder)	24	Male	2018-01-22	Self-referral to accident and emergency department (procedure)	Patient given written advice (situation)				Discharge to home (procedure)
Upper back injury (disorder)		40	Male	2018-01-22	Self-referral to accident and emergency department (procedure)					Discharge to home (procedure)
Upper back injury (disorder)	superficial injury of hand (disorder)	80	Male	2018-01-22	Self-referral to accident and emergency department (procedure)	Patient given written advice (situation)	Minor ambulatory surgery (procedure)	Plain radiography (procedure)	Plain radiography (procedure)	Discharge to home (procedure)
Upper back injury (disorder)	superficial injury of neck (disorder)	31	Male	2018-01-22	Self-referral to accident and emergency department (procedure)	Patient given written advice (situation)				Discharge to home (procedure)
Backache (finding)		29	Female	2018-01-23	Self-referral to accident and emergency department (procedure)	Patient given written advice (situation)		Plain radiography (procedure)	Plain radiography (procedure)	Discharge to home (procedure)
Backache (finding)		29	Female	2018-01-23	Self-referral to accident and emergency department (procedure)	Patient given written advice (situation)				Discharge to home (procedure)
Backache (finding)	patient walked out (finding)	24	Female	2018-01-23	Self-referral to accident and emergency department (procedure)					Discharge to home (procedure)
Backache (finding)	sciatica (disorder)	71	Male	2018-01-23	Self-referral to accident and emergency department (procedure)	Administration of medication (procedure)		Urea and electrolytes (procedure)	Complete blood count (procedure)	Patient transfer, to another health care facility (procedure)
Backache (finding)	urinary tract infectious disease (disorder)	41	Female	2018-01-23	Self-referral to accident and emergency department (procedure)	Administration of medication (procedure)		C-reactive protein measurement (procedure)	Complete blood count (procedure)	Discharge to home (procedure)
Lower back injury (disorder)		52	Female	2018-01-23	Referred by member of Primary Health Care Team (finding)	Administration of medication (procedure)		Plain radiography (procedure)	Plain radiography (procedure)	Discharge to home (procedure)
Lower back injury (disorder)	injury of muscle of lower back (disorder)	33	Male	2018-01-23	Self-referral to accident and emergency department (procedure)					Discharge to home (procedure)
Lower back injury (disorder)	injury of muscle of lower back (disorder)	43	Male	2018-01-23	Self-referral to accident and emergency department (procedure)	Administration of medication (procedure)		Plain radiography (procedure)	Plain radiography (procedure)	Discharge to home (procedure)
Lower back injury (disorder)	injury of muscle of lower back (disorder)	73	Female	2018-01-23	Self-referral to accident and emergency department (procedure)	Patient given written advice (situation)		Plain radiography (procedure)	Plain radiography (procedure)	Discharge to home (procedure)
Lower back injury (disorder)	spinal cord injury (disorder)	52	Female	2018-01-23	Referred by member of Primary Health Care Team (finding)	Patient given written advice (situation)	Cardiac monitor surveillance (regime/therapy)			Patient transfer, to another health care facility (procedure)
Lower back injury (disorder)	superficial injury of pelvic region (disorder)	64	Female	2018-01-23	Self-referral to accident and emergency department (procedure)	Administration of medication (procedure)		Plain radiography (procedure)	Plain radiography (procedure)	Discharge to home (procedure)
Lower back injury (disorder)	superficial injury of perineum (disorder)	47	Female	2018-01-23	Referred by National Health Service 111 service (finding)	Patient given written advice (situation)		Plain radiography (procedure)	Plain radiography (procedure)	Discharge to home (procedure)
Backache (finding)		25	Male	2018-01-24	Self-referral to accident and emergency department (procedure)
Backache (finding)		42	Male	2018-01-24	Self-referral to accident and emergency department (procedure)
Backache (finding)	injury of muscle of upper back (disorder)	28	Male	2018-01-24	Self-referral to accident and emergency department (procedure)	Administration of medication (procedure)				Discharge to home (procedure)
Backache (finding)	patient walked out (finding)	23	Female	2018-01-24	Self-referral to accident and emergency department (procedure)	Patient given written advice (situation)				Discharge to home (procedure)
Backache (finding)	sciatica (disorder)	81	Female	2018-01-24	Referred by member of Primary Health Care Team (finding)	Administration of medication (procedure)		Urinalysis (procedure)		Discharge to ward (procedure)
Injury of cervical region of back (disorder)	neck sprain (disorder)	18	Male	2018-01-24	Referred by hospital emergency department (finding)	Patient given written advice (situation)		Plain radiography (procedure)	Plain radiography (procedure)	Discharge to home (procedure)
Lower back injury (disorder)	closed fracture lumbar vertebra (disorder)	47	Male	2018-01-24	Self-referral to accident and emergency department (procedure)			Computerized axial tomography (procedure)		Discharge to home (procedure)
Lower back injury (disorder)	injury of muscle of lower back (disorder)	38	Female	2018-01-24	Self-referral to accident and emergency department (procedure)					Discharge to home (procedure)
Lower back injury (disorder)	injury of muscle of lower back (disorder)	52	Female	2018-01-24	Self-referral to accident and emergency department (procedure)	Administration of medication (procedure)				Discharge to home (procedure)
Lower back injury (disorder)	lumbar sprain (disorder)	37	Female	2018-01-24	Self-referral to accident and emergency department (procedure)	Patient given written advice (situation)		Magnetic resonance imaging (procedure)	Magnetic resonance imaging (procedure)	Discharge to home (procedure)
Backache (finding)		17	Female	2018-01-25	Self-referral to accident and emergency department (procedure)					Discharge to home (procedure)
Backache (finding)		37	Female	2018-01-25	Self-referral to accident and emergency department (procedure)	Patient given written advice (situation)				Discharge to home (procedure)
Backache (finding)		38	Male	2018-01-25	Self-referral to accident and emergency department (procedure)					Emergency department discharge to ambulatory emergency care service (procedure)
Backache (finding)		54	Male	2018-01-25	Self-referral to accident and emergency department (procedure)					Emergency department discharge to ambulatory emergency care service (procedure)
Backache (finding)	lower respiratory tract infection (disorder)	64	Male	2018-01-25	Referred by National Health Service 111 service (finding)	New medication commenced (finding)		C-reactive protein measurement (procedure)	Complete blood count (procedure)	Discharge to home (procedure)
Backache (finding)	lumbar sprain (disorder)	32	Female	2018-01-25	Self-referral to accident and emergency department (procedure)	Administration of medication (procedure)				Discharge to home (procedure)
Backache (finding)	lumbar sprain (disorder)	61	Female	2018-01-25	Self-referral to accident and emergency department (procedure)	Administration of medication (procedure)				Discharge to home (procedure)
Backache (finding)	superficial injury of back (disorder)	70	Female	2018-01-25	Self-referral to accident and emergency department (procedure)	Cardiac monitor surveillance (regime/therapy)		Urinalysis (procedure)	Blood coagulation panel (procedure)	Discharge to home (procedure)
Backache (finding)	superficial injury of back (disorder)	93	Female	2018-01-25	Self-referral to accident and emergency department (procedure)	Cardiac monitor surveillance (regime/therapy)	Administration of medication (procedure)			Discharge to ward (procedure)
Lower back injury (disorder)		49	Male	2018-01-25	Referred by National Health Service 111 service (finding)	Patient given written advice (situation)				Discharge to home (procedure)
Lower back injury (disorder)	injury of muscle of lower back (disorder)	20	Male	2018-01-25	Self-referral to accident and emergency department (procedure)	Administration of medication (procedure)	Patient given written advice (situation)			Discharge to home (procedure)
Lower back injury (disorder)	injury of muscle of lower back (disorder)	40	Male	2018-01-25	Self-referral to accident and emergency department (procedure)	Patient given written advice (situation)	Administration of medication (procedure)	Plain radiography (procedure)	Plain radiography (procedure)	Discharge to home (procedure)
Lower back injury (disorder)	superficial injury of back (disorder)	26	Male	2018-01-25	Self-referral to accident and emergency department (procedure)	Patient given written advice (situation)	New medication commenced (finding)	Plain radiography (procedure)	Plain radiography (procedure)	Discharge to home (procedure)
Upper back injury (disorder)	patient walked out (finding)	47	Male	2018-01-25	Self-referral to accident and emergency department (procedure)	Patient given written advice (situation)				Discharge to home (procedure)
Backache (finding)		28	Female	2018-01-26	Self-referral to accident and emergency department (procedure)					Discharge to home (procedure)
Backache (finding)		54	Female	2018-01-26	Self-referral to accident and emergency department (procedure)					Discharge to home (procedure)
Backache (finding)	injury of muscle of lower back (disorder)	35	Male	2018-01-26	Self-referral to accident and emergency department (procedure)	Cardiac monitor surveillance (regime/therapy)	Administration of medication (procedure)			Discharge to home (procedure)
Backache (finding)	injury of muscle of lower back (disorder)	37	Male	2018-01-26	Referred by National Health Service 111 service (finding)	Patient given written advice (situation)	New medication commenced (finding)	Urinalysis (procedure)		Discharge to home (procedure)
Backache (finding)	injury of muscle of lower back (disorder)	60	Female	2018-01-26	Referred by member of Primary Health Care Team (finding)	Patient given written advice (situation)				Discharge to home (procedure)
Backache (finding)	lower respiratory tract infection (disorder)	69	Female	2018-01-26	Referred by National Health Service 111 service (finding)	Cardiac monitor surveillance (regime/therapy)	Administration of medication (procedure)	Plain radiography (procedure)	Plain radiography (procedure)	Discharge to home (procedure)
Backache (finding)	ureteric stone (disorder)	69	Male	2018-01-26	Self-referral to accident and emergency department (procedure)	Insertion of catheter into urinary bladder (procedure)		Urea and electrolytes (procedure)	Urea and electrolytes (procedure)	Discharge to home (procedure)
Lower back injury (disorder)		71	Female	2018-01-26	Self-referral to accident and emergency department (procedure)	Patient given written advice (situation)				Discharge to home (procedure)
Lower back injury (disorder)		76	Female	2018-01-26	Referred by National Health Service 111 service (finding)			Urinalysis (procedure)	Plain radiography (procedure)	Discharge to home (procedure)
Lower back injury (disorder)	closed fracture lumbar vertebra (disorder)	66	Male	2018-01-26	Self-referral to accident and emergency department (procedure)	New medication commenced (finding)		Urinalysis (procedure)	Plain radiography (procedure)	Discharge to home (procedure)
Lower back injury (disorder)	injury of muscle of lower back (disorder)	40	Female	2018-01-26	Self-referral to accident and emergency department (procedure)	Patient given written advice (situation)	Administration of medication (procedure)			Discharge to home (procedure)
Lower back injury (disorder)	injury of muscle of lower back (disorder)	53	Male	2018-01-26	Self-referral to accident and emergency department (procedure)	Administration of medication (procedure)		Urea and electrolytes (procedure)	Blood coagulation panel (procedure)	Discharge to home (procedure)
Lower back injury (disorder)	injury of muscle of lower back (disorder)	82	Female	2018-01-26	Referred by member of Primary Health Care Team (finding)	Patient given written advice (situation)				Discharge to home (procedure)
Lower back injury (disorder)	superficial injury of back (disorder)	48	Female	2018-01-26	Self-referral to accident and emergency department (procedure)	Patient given written advice (situation)		Plain radiography (procedure)	Plain radiography (procedure)	Discharge to home (procedure)
Backache (finding)		21	Male	2018-01-27	Self-referral to accident and emergency department (procedure)					Emergency department discharge to ambulatory emergency care service (procedure)
Backache (finding)		59	Male	2018-01-27	Self-referral to accident and emergency department (procedure)	Cardiac monitor surveillance (regime/therapy)	Intravenous cannulation (procedure)	Electrocardiographic procedure (procedure)	Urea and electrolytes (procedure)	Discharge to home (procedure)
Backache (finding)	subarachnoid hemorrhage (disorder)	47	Male	2018-01-27	Self-referral to accident and emergency department (procedure)	Patient given written advice (situation)		Blood coagulation panel (procedure)	C-reactive protein measurement (procedure)	Discharge to ward (procedure)
Lower back injury (disorder)	lumbar sprain (disorder)	63	Female	2018-01-27	Self-referral to accident and emergency department (procedure)	Patient given written advice (situation)	Administration of medication (procedure)	Urea and electrolytes (procedure)	Blood coagulation panel (procedure)	Discharge to home (procedure)
Lower back injury (disorder)	sprain of hip (disorder)	76	Female	2018-01-27	Self-referral to accident and emergency department (procedure)	Patient given written advice (situation)		Plain radiography (procedure)	Plain radiography (procedure)	Discharge to home (procedure)
Lower back injury (disorder)	superficial injury of back (disorder)	55	Female	2018-01-27	Self-referral to accident and emergency department (procedure)	Patient given written advice (situation)				Discharge to home (procedure)
Lower back injury (disorder)	superficial injury of back (disorder)	82	Female	2018-01-27	Self-referral to accident and emergency department (procedure)	Patient given written advice (situation)				Discharge to home (procedure)
Backache (finding)		50	Female	2018-01-28	Self-referral to accident and emergency department (procedure)	Administration of medication (procedure)				Patient transfer, to another health care facility (procedure)
Backache (finding)		81	Female	2018-01-28	Self-referral to accident and emergency department (procedure)					Emergency department discharge to ambulatory emergency care service (procedure)
Backache (finding)	lumbar sprain (disorder)	34	Female	2018-01-28	Self-referral to accident and emergency department (procedure)	Administration of medication (procedure)				Discharge to home (procedure)
Lower back injury (disorder)		37	Female	2018-01-28	Self-referral to accident and emergency department (procedure)					Discharge to home (procedure)
Lower back injury (disorder)	injury of muscle of lower back (disorder)	86	Female	2018-01-28	Referred by National Health Service 111 service (finding)	Patient given written advice (situation)		Urea and electrolytes (procedure)	Urea and electrolytes (procedure)	Discharge to home (procedure)
Lower back injury (disorder)	injury of muscle of lower back (disorder)	90	Female	2018-01-28	Self-referral to accident and emergency department (procedure)	Patient given written advice (situation)	Intravenous cannulation (procedure)	Urea and electrolytes (procedure)	Blood coagulation panel (procedure)	Discharge to ward (procedure)
Lower back injury (disorder)	lumbar sprain (disorder)	91	Female	2018-01-28	Self-referral to accident and emergency department (procedure)			Plain radiography (procedure)	Plain radiography (procedure)	Discharge to residential home (procedure)
Lower back injury (disorder)	patient walked out (finding)	22	Female	2018-01-28	Referred by police (finding)	Patient given written advice (situation)		Urinalysis (procedure)		Discharge to home (procedure)
Lower back injury (disorder)	sprain of knee (disorder)	49	Male	2018-01-28	Self-referral to accident and emergency department (procedure)	Patient given written advice (situation)		Plain radiography (procedure)	Plain radiography (procedure)	Discharge to home (procedure)
Lower back injury (disorder)	superficial injury of back (disorder)	45	Male	2018-01-28	Self-referral to accident and emergency department (procedure)					Discharge to home (procedure)
Backache (finding)		28	Female	2018-01-29	Self-referral to accident and emergency department (procedure)	Administration of medication (procedure)				Discharge to home (procedure)
Backache (finding)		45	Male	2018-01-29	Self-referral to accident and emergency department (procedure)					Discharge to home (procedure)
Backache (finding)		47	Male	2018-01-29	Referred by member of Primary Health Care Team (finding)	Administration of medication (procedure)				Discharge to home (procedure)
Backache (finding)	acute coronary syndrome (disorder)	79	Female	2018-01-29	Referred by National Health Service 111 service (finding)	Patient given written advice (situation)		Electrocardiographic procedure (procedure)	Plain radiography (procedure)	Discharge to home (procedure)
Backache (finding)	lumbar sprain (disorder)	53	Female	2018-01-29	Self-referral to accident and emergency department (procedure)					Discharge to home (procedure)
Backache (finding)	urinary tract infectious disease (disorder)	75	Male	2018-01-29	Referred by National Health Service 111 service (finding)	Administration of medication (procedure)		Urea and electrolytes (procedure)	Blood coagulation panel (procedure)	Discharge to home (procedure)
Lower back injury (disorder)		64	Female	2018-01-29	Referred by National Health Service 111 service (finding)					Discharge to home (procedure)
Lower back injury (disorder)	neck sprain (disorder)	71	Female	2018-01-29	Self-referral to accident and emergency department (procedure)	Patient given written advice (situation)				Discharge to home (procedure)
Lower back injury (disorder)	sprain of knee (disorder)	25	Male	2018-01-29	Self-referral to accident and emergency department (procedure)	Patient given written advice (situation)	New medication commenced (finding)	Plain radiography (procedure)	Plain radiography (procedure)	Discharge to home (procedure)
Lower back injury (disorder)	superficial injury of back (disorder)	48	Female	2018-01-29	Self-referral to accident and emergency department (procedure)	Patient given written advice (situation)				Discharge to home (procedure)
Upper back injury (disorder)		40	Male	2018-01-29	Self-referral to accident and emergency department (procedure)	Patient given written advice (situation)		Plain radiography (procedure)	Plain radiography (procedure)	Discharge to home (procedure)
Backache (finding)		20	Male	2018-01-30	Self-referral to accident and emergency department (procedure)					Discharge to home (procedure)
Backache (finding)	closed fracture lumbar vertebra (disorder)	19	Male	2018-01-30	Referred by ambulance service (finding)			Plain radiography (procedure)	Plain radiography (procedure)	Patient transfer, to another health care facility (procedure)
Backache (finding)	lumbar sprain (disorder)	52	Male	2018-01-30	Self-referral to accident and emergency department (procedure)	Administration of medication (procedure)		Urinalysis (procedure)		Discharge to home (procedure)
Backache (finding)	lumbar sprain (disorder)	82	Female	2018-01-30	Referred by member of Primary Health Care Team (finding)	Cardiac monitor surveillance (regime/therapy)		Urinalysis (procedure)		Discharge to home (procedure)
Backache (finding)	superficial injury of back (disorder)	59	Male	2018-01-30	Referred by hospital outpatient department (finding)	Cardiac monitor surveillance (regime/therapy)		Magnetic resonance imaging (procedure)	Magnetic resonance imaging (procedure)	Discharge to home (procedure)
Backache (finding)	urinary tract infectious disease (disorder)	25	Female	2018-01-30	Self-referral to accident and emergency department (procedure)	Administration of medication (procedure)		Urinalysis (procedure)	Complete blood count (procedure)	Discharge to home (procedure)
Backache (finding)	urinary tract infectious disease (disorder)	28	Female	2018-01-30	Self-referral to accident and emergency department (procedure)	New medication commenced (finding)	Patient given written advice (situation)	Urinalysis (procedure)		Discharge to home (procedure)
Lower back injury (disorder)		24	Male	2018-01-30	Referred by National Health Service 111 service (finding)					Discharge to home (procedure)
Lower back injury (disorder)		50	Female	2018-01-30	Referred by National Health Service 111 service (finding)			Urea and electrolytes (procedure)	Urea and electrolytes (procedure)	Discharge to home (procedure)
Lower back injury (disorder)	acute coronary syndrome (disorder)	78	Female	2018-01-30	Referred by ambulance service (finding)	Administration of medication (procedure)		Plain radiography (procedure)	Plain radiography (procedure)	Discharge to ward (procedure)
Lower back injury (disorder)	closed fracture lumbar vertebra (disorder)	77	Male	2018-01-30	Self-referral to accident and emergency department (procedure)			Urea and electrolytes (procedure)	Computerized axial tomography (procedure)	Discharge to home (procedure)
Lower back injury (disorder)	injury of muscle of lower back (disorder)	58	Male	2018-01-30	Self-referral to accident and emergency department (procedure)	Administration of medication (procedure)				Discharge to home (procedure)
Lower back injury (disorder)	pneumonia (disorder)	88	Female	2018-01-30	Self-referral to accident and emergency department (procedure)	Administration of medication (procedure)		Urea and electrolytes (procedure)	Complete blood count (procedure)	Discharge to ward (procedure)
Backache (finding)		17	Female	2018-01-31	Self-referral to accident and emergency department (procedure)					Discharge to home (procedure)
Backache (finding)		41	Male	2018-01-31	Referral by out of hours service (procedure)					Discharge to home (procedure)
Backache (finding)		50	Male	2018-01-31	Referred by member of Primary Health Care Team (finding)	Patient given written advice (situation)		Plain radiography (procedure)	Plain radiography (procedure)	Discharge to home (procedure)
Backache (finding)		57	Female	2018-01-31	Self-referral to accident and emergency department (procedure)					Discharge to home (procedure)
Backache (finding)	injury of muscle of lower back (disorder)	35	Female	2018-01-31	Referral by out of hours service (procedure)	New medication commenced (finding)				Discharge to home (procedure)
Backache (finding)	injury of muscle of lower back (disorder)	43	Female	2018-01-31	Self-referral to accident and emergency department (procedure)	Cardiac monitor surveillance (regime/therapy)	Administration of medication (procedure)			Discharge to home (procedure)
Backache (finding)	malignant neoplastic disease (disorder)	84	Female	2018-01-31	Self-referral to accident and emergency department (procedure)	Intravenous cannulation (procedure)		Electrocardiographic procedure (procedure)	Urinalysis (procedure)	Discharge to ward (procedure)
Lower back injury (disorder)		35	Female	2018-01-31	Self-referral to accident and emergency department (procedure)
Lower back injury (disorder)	cauda equina syndrome (disorder)	32	Female	2018-01-31	Referred by hospital outpatient department (finding)	Patient given written advice (situation)				Discharge to home (procedure)
Backache (finding)		22	Male	2018-02-01	Self-referral to accident and emergency department (procedure)					Discharge to home (procedure)
Backache (finding)		27	Female	2018-02-01	Referred by National Health Service 111 service (finding)	Patient given written advice (situation)				Discharge to home (procedure)
Backache (finding)		45	Male	2018-02-01	Self-referral to accident and emergency department (procedure)					Emergency department discharge to ambulatory emergency care service (procedure)
Backache (finding)		46	Male	2018-02-01	Self-referral to accident and emergency department (procedure)					Emergency department discharge to ambulatory emergency care service (procedure)
Backache (finding)		63	Female	2018-02-01	Self-referral to accident and emergency department (procedure)					Discharge to home (procedure)
Backache (finding)	cauda equina syndrome (disorder)	46	Male	2018-02-01	Self-referral to accident and emergency department (procedure)	Patient given written advice (situation)	Cardiac monitor surveillance (regime/therapy)			Discharge to ward (procedure)
Backache (finding)	injury of muscle of lower back (disorder)	32	Female	2018-02-01	Referred by hospital emergency department (finding)	Patient given written advice (situation)				Discharge to home (procedure)
Backache (finding)	injury of muscle of lower back (disorder)	49	Female	2018-02-01	Self-referral to accident and emergency department (procedure)	Administration of medication (procedure)				Discharge to home (procedure)
Backache (finding)	sciatica (disorder)	42	Female	2018-02-01	Self-referral to accident and emergency department (procedure)	Administration of medication (procedure)				Discharge to home (procedure)
Backache (finding)	ureteric stone (disorder)	60	Female	2018-02-01	Referred by National Health Service 111 service (finding)	Intravenous cannulation (procedure)	Administration of intravenous fluids (procedure)	Blood coagulation panel (procedure)	C-reactive protein measurement (procedure)	Patient transfer, to another health care facility (procedure)
Backache (finding)	urinary tract infectious disease (disorder)	77	Male	2018-02-01	Self-referral to accident and emergency department (procedure)	Administration of medication (procedure)		Urinalysis (procedure)		Discharge to home (procedure)
Lower back injury (disorder)		101	Female	2018-02-01	Referred by carer (finding)	Patient given written advice (situation)		Blood coagulation panel (procedure)	C-reactive protein measurement (procedure)	Discharge to home (procedure)
Lower back injury (disorder)		22	Male	2018-02-01	Self-referral to accident and emergency department (procedure)					Emergency department discharge to ambulatory emergency care service (procedure)
Lower back injury (disorder)		26	Male	2018-02-01	Referred by ambulance service (finding)	Patient given written advice (situation)				Discharge to home (procedure)
Lower back injury (disorder)	injury of muscle of lower back (disorder)	27	Female	2018-02-01	Self-referral to accident and emergency department (procedure)	Patient given written advice (situation)	Cardiac monitor surveillance (regime/therapy)	Plain radiography (procedure)	Plain radiography (procedure)	Discharge to home (procedure)
Lower back injury (disorder)	neck sprain (disorder)	48	Male	2018-02-01	Self-referral to accident and emergency department (procedure)	Administration of medication (procedure)		Plain radiography (procedure)	Plain radiography (procedure)	Discharge to home (procedure)
Lower back injury (disorder)	superficial injury of back (disorder)	35	Female	2018-02-01	Self-referral to accident and emergency department (procedure)	Patient given written advice (situation)				Discharge to home (procedure)
Lower back injury (disorder)	superficial injury of back (disorder)	83	Female	2018-02-01	Self-referral to accident and emergency department (procedure)	Administration of medication (procedure)	Cardiac monitor surveillance (regime/therapy)	Plain radiography (procedure)	Plain radiography (procedure)	Discharge to home (procedure)
Backache (finding)		48	Male	2018-02-02	Self-referral to accident and emergency department (procedure)					Discharge to home (procedure)
Backache (finding)	injury of muscle of lower back (disorder)	29	Female	2018-02-02	Referred by National Health Service 111 service (finding)	Patient given written advice (situation)				Discharge to home (procedure)
Backache (finding)	injury of muscle of lower back (disorder)	52	Male	2018-02-02	Referred by member of Primary Health Care Team (finding)	Administration of medication (procedure)		Urinalysis (procedure)		Discharge to home (procedure)
Backache (finding)	injury of muscle of lower back (disorder)	75	Male	2018-02-02	Referred by member of Primary Health Care Team (finding)	Administration of medication (procedure)				Discharge to ward (procedure)
Backache (finding)	intestinal obstruction (disorder)	76	Female	2018-02-02	Self-referral to accident and emergency department (procedure)	Administration of medication (procedure)		Plain radiography (procedure)	Plain radiography (procedure)	Discharge to home (procedure)
Backache (finding)	sprain of shoulder (disorder)	35	Male	2018-02-02	Self-referral to accident and emergency department (procedure)	Patient given written advice (situation)				Discharge to home (procedure)
Lower back injury (disorder)		47	Male	2018-02-02	Self-referral to accident and emergency department (procedure)					Discharge to home (procedure)
Lower back injury (disorder)		47	Male	2018-02-02	Self-referral to accident and emergency department (procedure)					Discharge to home (procedure)
Lower back injury (disorder)	lumbar sprain (disorder)	31	Female	2018-02-02	Self-referral to accident and emergency department (procedure)	Administration of medication (procedure)				Discharge to home (procedure)
Lower back injury (disorder)	superficial injury of back (disorder)	49	Female	2018-02-02	Referred by member of Primary Health Care Team (finding)	Patient given written advice (situation)				Discharge to home (procedure)
Backache (finding)		25	Female	2018-02-03	Self-referral to accident and emergency department (procedure)					Discharge to home (procedure)
Backache (finding)		89	Female	2018-02-03	Referred by National Health Service 111 service (finding)	Patient given written advice (situation)		Urinalysis (procedure)	Plain radiography (procedure)	Discharge to home (procedure)
Backache (finding)	lumbar sprain (disorder)	25	Female	2018-02-03	Referral by out of hours service (procedure)	Patient given written advice (situation)	Administration of medication (procedure)			Discharge to home (procedure)
Lower back injury (disorder)		30	Male	2018-02-03	Self-referral to accident and emergency department (procedure)					Discharge to home (procedure)
Lower back injury (disorder)	injury of muscle of lower back (disorder)	42	Female	2018-02-03	Self-referral to accident and emergency department (procedure)	Patient given written advice (situation)				Discharge to home (procedure)
Lower back injury (disorder)	sciatica (disorder)	68	Male	2018-02-03	Referred by hospital outpatient department (finding)					Discharge to home (procedure)
Lower back injury (disorder)	superficial injury of back (disorder)	89	Female	2018-02-03	Referred by carer (finding)	Patient given written advice (situation)		Glucose measurement, blood, test strip (procedure)	Urea and electrolytes (procedure)	Discharge to home (procedure)
Lower back injury (disorder)	superficial injury of head (disorder)	76	Male	2018-02-03	Self-referral to accident and emergency department (procedure)	Cardiac monitor surveillance (regime/therapy)	Cardiac monitor surveillance (regime/therapy)	Electrocardiographic procedure (procedure)	Computerized axial tomography (procedure)	Discharge to home (procedure)
Backache (finding)		19	Female	2018-02-04	Referred by National Health Service 111 service (finding)			Human chorionic gonadotropin measurement (procedure)	Urinalysis (procedure)	Discharge to home (procedure)
Backache (finding)		42	Male	2018-02-04	Self-referral to accident and emergency department (procedure)					Discharge to home (procedure)
Backache (finding)	sciatica (disorder)	45	Female	2018-02-04	Self-referral to accident and emergency department (procedure)	Administration of medication (procedure)				Discharge to home (procedure)
Lower back injury (disorder)		26	Male	2018-02-04	Referred by National Health Service 111 service (finding)	Patient given written advice (situation)				Discharge to home (procedure)
Lower back injury (disorder)	orthostatic hypotension (disorder)	94	Female	2018-02-04	Referred by carer (finding)	Patient given written advice (situation)	Cardiac monitor surveillance (regime/therapy)	Complete blood count (procedure)	Urea and electrolytes (procedure)	Discharge to home (procedure)
Upper back injury (disorder)		46	Female	2018-02-04	Referred by urgent care service (finding)	Patient given written advice (situation)		Plain radiography (procedure)	Plain radiography (procedure)	Discharge to home (procedure)
Upper back injury (disorder)	strain of neck muscle (disorder)	18	Male	2018-02-04	Self-referral to accident and emergency department (procedure)	Administration of medication (procedure)				Discharge to home (procedure)
Upper back injury (disorder)	superficial injury of back (disorder)	53	Female	2018-02-04	Self-referral to accident and emergency department (procedure)	Administration of medication (procedure)				Discharge to home (procedure)
Backache (finding)		20	Male	2018-02-05	Self-referral to accident and emergency department (procedure)	Cardiac monitor surveillance (regime/therapy)		Urinalysis (procedure)		Discharge to home (procedure)
Backache (finding)		40	Female	2018-02-05	Self-referral to accident and emergency department (procedure)					Discharge to home (procedure)
Backache (finding)		53	Female	2018-02-05	Referred by ambulance service (finding)			Electrocardiographic procedure (procedure)	Blood coagulation panel (procedure)	Discharge to home (procedure)
Backache (finding)		59	Male	2018-02-05	Referred by member of Primary Health Care Team (finding)					Discharge to home (procedure)
Backache (finding)		78	Male	2018-02-05	Referred by National Health Service 111 service (finding)	Patient given written advice (situation)	Administration of medication (procedure)	C-reactive protein measurement (procedure)	Complete blood count (procedure)	Discharge to ward (procedure)
Backache (finding)	cauda equina syndrome (disorder)	45	Male	2018-02-05	Referred by member of Primary Health Care Team (finding)	Administration of medication (procedure)	Patient given written advice (situation)	Magnetic resonance imaging (procedure)	Magnetic resonance imaging (procedure)	Emergency department discharge to emergency department short stay ward (procedure)
Backache (finding)	cauda equina syndrome (disorder)	45	Male	2018-02-05	Self-referral to accident and emergency department (procedure)	Patient given written advice (situation)				Discharge to home (procedure)
Backache (finding)	ureteric stone (disorder)	64	Female	2018-02-05	Self-referral to accident and emergency department (procedure)	Patient given written advice (situation)		Urinalysis (procedure)	Computerized axial tomography (procedure)	Patient transfer, to another health care facility (procedure)
Lower back injury (disorder)		20	Female	2018-02-05	Self-referral to accident and emergency department (procedure)	Administration of medication (procedure)				Discharge to home (procedure)
Lower back injury (disorder)		76	Female	2018-02-05	Referred by member of Primary Health Care Team (finding)	New medication commenced (finding)		Plain radiography (procedure)	Plain radiography (procedure)	Discharge to home (procedure)
Lower back injury (disorder)	superficial injury of back (disorder)	47	Female	2018-02-05	Referred by member of Primary Health Care Team (finding)	Patient given written advice (situation)	Administration of medication (procedure)	Plain radiography (procedure)	Plain radiography (procedure)	Discharge to home (procedure)
Lower back injury (disorder)	superficial injury of chest (disorder)	37	Female	2018-02-05	Self-referral to accident and emergency department (procedure)	Patient given written advice (situation)				Discharge to home (procedure)
Backache (finding)		24	Male	2018-02-06	Self-referral to accident and emergency department (procedure)	Administration of medication (procedure)	Patient given written advice (situation)			Discharge to home (procedure)
Backache (finding)		33	Female	2018-02-06	Self-referral to accident and emergency department (procedure)					Discharge to home (procedure)
Backache (finding)		40	Male	2018-02-06	Self-referral to accident and emergency department (procedure)					Discharge to home (procedure)
Backache (finding)	injury of muscle of lower back (disorder)	50	Male	2018-02-06	Self-referral to accident and emergency department (procedure)	New medication commenced (finding)	Patient given written advice (situation)			Discharge to home (procedure)
Backache (finding)	patient walked out (finding)	56	Male	2018-02-06	Referred by National Health Service 111 service (finding)					Discharge to home (procedure)
Lower back injury (disorder)		28	Female	2018-02-06	Self-referral to accident and emergency department (procedure)	Patient given written advice (situation)		Urinalysis (procedure)		Discharge to home (procedure)
Lower back injury (disorder)	closed fracture lumbar vertebra (disorder)	85	Female	2018-02-06	Self-referral to accident and emergency department (procedure)	Patient given written advice (situation)		Plain radiography (procedure)		Discharge to home (procedure)
Lower back injury (disorder)	closed fracture thoracic vertebra (disorder)	71	Female	2018-02-06	Local Code	Administration of medication (procedure)	Cardiac monitor surveillance (regime/therapy)	C-reactive protein measurement (procedure)	Complete blood count (procedure)	Discharge to ward (procedure)
Lower back injury (disorder)	superficial injury of chest (disorder)	20	Male	2018-02-06	Referral by out of hours service (procedure)	New medication commenced (finding)				Discharge to home (procedure)
Upper back injury (disorder)	lower respiratory tract infection (disorder)	88	Male	2018-02-06	Self-referral to accident and emergency department (procedure)	Administration of medication (procedure)	New medication commenced (finding)	Electrocardiographic procedure (procedure)	Blood coagulation panel (procedure)	Discharge to home (procedure)
Backache (finding)		26	Male	2018-02-07	Self-referral to accident and emergency department (procedure)					Discharge to home (procedure)
Backache (finding)		46	Female	2018-02-07	Self-referral to accident and emergency department (procedure)					Discharge to home (procedure)
Backache (finding)	cauda equina syndrome (disorder)	38	Male	2018-02-07	Referred by member of Primary Health Care Team (finding)	Patient given written advice (situation)				Discharge to home (procedure)
Backache (finding)	sciatica (disorder)	85	Female	2018-02-07	Referred by member of Primary Health Care Team (finding)	Cardiac monitor surveillance (regime/therapy)	Patient given written advice (situation)	Urea and electrolytes (procedure)	Blood coagulation panel (procedure)	Discharge to ward (procedure)
Injury of cervical region of back (disorder)	closed fracture of hip (disorder)	78	Female	2018-02-07	Referred by hospital emergency department (finding)	Administration of medication (procedure)		Urea and electrolytes (procedure)	Complete blood count (procedure)	Discharge to ward (procedure)
Lower back injury (disorder)	disorder of nervous system (disorder)	31	Female	2018-02-07	Self-referral to accident and emergency department (procedure)	Patient given written advice (situation)		Urea and electrolytes (procedure)	Blood coagulation panel (procedure)	Discharge to home (procedure)
Lower back injury (disorder)	injury of muscle of lower back (disorder)	43	Female	2018-02-07	Self-referral to accident and emergency department (procedure)	Patient given written advice (situation)				Discharge to home (procedure)
Lower back injury (disorder)	injury of muscle of lower back (disorder)	49	Female	2018-02-07	Self-referral to accident and emergency department (procedure)	Cardiac monitor surveillance (regime/therapy)	Patient given written advice (situation)			Discharge to home (procedure)
Lower back injury (disorder)	referral to general practitioner (procedure)	57	Female	2018-02-07	Self-referral to accident and emergency department (procedure)	Cardiac monitor surveillance (regime/therapy)	Patient given written advice (situation)	Plain radiography (procedure)	Plain radiography (procedure)	Discharge to home (procedure)
Lower back injury (disorder)	superficial injury of foot (disorder)	20	Female	2018-02-07	Self-referral to accident and emergency department (procedure)	Patient given written advice (situation)		Plain radiography (procedure)	Plain radiography (procedure)	Discharge to home (procedure)
Lower back injury (disorder)	superficial injury of pelvic region (disorder)	22	Female	2018-02-07	Self-referral to accident and emergency department (procedure)	Patient given written advice (situation)	Administration of medication (procedure)			Discharge to home (procedure)
Upper back injury (disorder)	superficial injury of back (disorder)	71	Female	2018-02-07	Self-referral to accident and emergency department (procedure)	Cardiac monitor surveillance (regime/therapy)	Administration of medication (procedure)	Plain radiography (procedure)	Urinalysis (procedure)	Discharge to home (procedure)
Backache (finding)		48	Female	2018-02-08	Self-referral to accident and emergency department (procedure)					Discharge to home (procedure)
Backache (finding)	disorder of nervous system (disorder)	31	Female	2018-02-08	Self-referral to accident and emergency department (procedure)	Intravenous antibiotic therapy (procedure)		Urinalysis (procedure)		Discharge to ward (procedure)
Backache (finding)	injury of muscle of lower back (disorder)	30	Male	2018-02-08	Referred by National Health Service 111 service (finding)	New medication commenced (finding)				Discharge to home (procedure)
Backache (finding)	injury of muscle of lower back (disorder)	59	Female	2018-02-08	Referred by member of Primary Health Care Team (finding)	Patient given written advice (situation)	New medication commenced (finding)			Discharge to home (procedure)
Backache (finding)	pyelonephritis (disorder)	30	Female	2018-02-08	Referred by member of Primary Health Care Team (finding)	Cardiac monitor surveillance (regime/therapy)	Patient given written advice (situation)	Urea and electrolytes (procedure)	Blood coagulation panel (procedure)	Discharge to ward (procedure)
Lower back injury (disorder)		19	Male	2018-02-08	Referred by member of Primary Health Care Team (finding)	Patient given written advice (situation)				Discharge to ward (procedure)
Lower back injury (disorder)		19	Female	2018-02-08	Self-referral to accident and emergency department (procedure)					Discharge to home (procedure)
Lower back injury (disorder)		22	Female	2018-02-08	Self-referral to accident and emergency department (procedure)	Patient given written advice (situation)				Discharge to home (procedure)
Lower back injury (disorder)		34	Female	2018-02-08	Self-referral to accident and emergency department (procedure)	Administration of medication (procedure)		Plain radiography (procedure)	Plain radiography (procedure)	Discharge to home (procedure)
Lower back injury (disorder)		54	Female	2018-02-08	Self-referral to accident and emergency department (procedure)					Discharge to home (procedure)
Lower back injury (disorder)	injury of muscle of lower back (disorder)	24	Female	2018-02-08	Self-referral to accident and emergency department (procedure)	Administration of medication (procedure)				Discharge to home (procedure)
Lower back injury (disorder)	injury of muscle of lower back (disorder)	47	Female	2018-02-08	Self-referral to accident and emergency department (procedure)	Administration of medication (procedure)				Discharge to home (procedure)
Lower back injury (disorder)	injury of muscle of lower back (disorder)	69	Female	2018-02-08	Self-referral to accident and emergency department (procedure)	Administration of medication (procedure)		Plain radiography (procedure)	Plain radiography (procedure)	Discharge to home (procedure)
Upper back injury (disorder)	superficial injury of chest (disorder)	52	Male	2018-02-08	Self-referral to accident and emergency department (procedure)	Patient given written advice (situation)				Discharge to home (procedure)
Backache (finding)		26	Male	2018-02-09	Self-referral to accident and emergency department (procedure)					Discharge to home (procedure)
Backache (finding)	disorder of nervous system (disorder)	34	Male	2018-02-09	Self-referral to accident and emergency department (procedure)	Intravenous cannulation (procedure)	Administration of medication (procedure)	Computerized axial tomography (procedure)	Computerized axial tomography (procedure)	Discharge to ward (procedure)
Backache (finding)	injury of muscle of lower back (disorder)	34	Male	2018-02-09	Self-referral to accident and emergency department (procedure)					Discharge to home (procedure)
Backache (finding)	patient walked out (finding)	27	Male	2018-02-09	Self-referral to accident and emergency department (procedure)					Discharge to home (procedure)
Lower back injury (disorder)		35	Male	2018-02-09	Self-referral to accident and emergency department (procedure)					Discharge to home (procedure)
Lower back injury (disorder)		74	Male	2018-02-09	Self-referral to accident and emergency department (procedure)					Discharge to home (procedure)
Lower back injury (disorder)	closed fracture lumbar vertebra (disorder)	61	Female	2018-02-09	Referred by hospital emergency department (finding)	Administration of drug or medicament by intravenous push (procedure)	Administration of medication (procedure)	Plain radiography (procedure)	Plain radiography (procedure)	Discharge to home (procedure)
Lower back injury (disorder)	superficial injury of back (disorder)	91	Female	2018-02-09	Self-referral to accident and emergency department (procedure)	Cardiac monitor surveillance (regime/therapy)	Administration of medication (procedure)	Electrocardiographic procedure (procedure)	Urinalysis (procedure)	Discharge to home (procedure)
Upper back injury (disorder)		22	Male	2018-02-09	Self-referral to accident and emergency department (procedure)					Discharge to home (procedure)
Backache (finding)	cellulitis (disorder)	28	Male	2018-02-10	Self-referral to accident and emergency department (procedure)	Administration of medication (procedure)	Cardiac monitor surveillance (regime/therapy)	Complete blood count (procedure)	Urea and electrolytes (procedure)	Discharge to home (procedure)
Backache (finding)	orthostatic hypotension (disorder)	80	Female	2018-02-10	Referred by advanced care practitioner (finding)	Patient given written advice (situation)		Urinalysis (procedure)	Urea and electrolytes (procedure)	Discharge to ward (procedure)
Lower back injury (disorder)		22	Female	2018-02-10	Self-referral to accident and emergency department (procedure)					Emergency department discharge to ambulatory emergency care service (procedure)
Lower back injury (disorder)		73	Male	2018-02-10	Referred by member of Primary Health Care Team (finding)	Patient given written advice (situation)		Plain radiography (procedure)	Plain radiography (procedure)	Discharge to home (procedure)
Lower back injury (disorder)	injury of muscle of lower back (disorder)	18	Male	2018-02-10	Self-referral to accident and emergency department (procedure)	Cardiac monitor surveillance (regime/therapy)	Patient given written advice (situation)	Plain radiography (procedure)	Plain radiography (procedure)	Discharge to home (procedure)
Lower back injury (disorder)	injury of muscle of upper back (disorder)	61	Male	2018-02-10	Self-referral to accident and emergency department (procedure)	Patient given written advice (situation)		Plain radiography (procedure)	Plain radiography (procedure)	Discharge to residential home (procedure)
Lower back injury (disorder)	traumatic brain injury with brief loss of consciousness (disorder)	41	Female	2018-02-10	Self-referral to accident and emergency department (procedure)	Patient given written advice (situation)	Cardiac monitor surveillance (regime/therapy)	Urinalysis (procedure)	Computerized axial tomography (procedure)	Discharge to home (procedure)
Lower back injury (disorder)	urinary tract infectious disease (disorder)	78	Male	2018-02-10	Referred by National Health Service 111 service (finding)	Patient given written advice (situation)		Urinalysis (procedure)		Discharge to ward (procedure)
Upper back injury (disorder)		43	Male	2018-02-10	Self-referral to accident and emergency department (procedure)	Patient given written advice (situation)		Plain radiography (procedure)	Plain radiography (procedure)	Discharge to home (procedure)
Backache (finding)		23	Female	2018-02-11	Self-referral to accident and emergency department (procedure)					Emergency department discharge to ambulatory emergency care service (procedure)
Backache (finding)		56	Male	2018-02-11	Self-referral to accident and emergency department (procedure)	Administration of medication (procedure)				Discharge to home (procedure)
Backache (finding)	costal chondritis (disorder)	25	Male	2018-02-11	Referred by National Health Service 111 service (finding)	Administration of medication (procedure)		Complete blood count (procedure)	Cardiac enzymes/isoenzymes measurement (procedure)	Discharge to home (procedure)
Backache (finding)	injury of muscle of lower back (disorder)	62	Male	2018-02-11	Self-referral to accident and emergency department (procedure)			Urinalysis (procedure)		Discharge to home (procedure)
Backache (finding)	injury of muscle of lower back (disorder)	88	Female	2018-02-11	Referred by National Health Service 111 service (finding)	New medication commenced (finding)		Urinalysis (procedure)	Computerized axial tomography (procedure)	Discharge to home (procedure)
Backache (finding)	injury of muscle of upper back (disorder)	58	Male	2018-02-11	Referred by ambulance service (finding)	Patient given written advice (situation)		Electrocardiographic procedure (procedure)		Discharge to home (procedure)
Backache (finding)	leptospirosis (disorder)	45	Male	2018-02-11	Referred by urgent care service (finding)	Administration of medication (procedure)	Administration of intravenous fluids (procedure)	Complete blood count (procedure)	Blood coagulation panel (procedure)	Discharge to ward (procedure)
Backache (finding)	pre-infarction syndrome (disorder)	55	Male	2018-02-11	Referred by National Health Service 111 service (finding)	Administration of medication (procedure)				Discharge to ward (procedure)
Lower back injury (disorder)		49	Female	2018-02-11	Self-referral to accident and emergency department (procedure)	Patient given written advice (situation)		Computerized axial tomography (procedure)	Computerized axial tomography (procedure)	Discharge to home (procedure)
Lower back injury (disorder)	malignant neoplastic disease (disorder)	73	Male	2018-02-11	Self-referral to accident and emergency department (procedure)	Administration of medication (procedure)	Administration of drug or medicament by intravenous push (procedure)	Complete blood count (procedure)	Urea and electrolytes (procedure)	Discharge to ward (procedure)
Lower back injury (disorder)	superficial injury of back (disorder)	73	Female	2018-02-11	Referred by National Health Service 111 service (finding)					Discharge to home (procedure)
Lower back injury (disorder)	superficial injury of elbow (disorder)	48	Female	2018-02-11	Self-referral to accident and emergency department (procedure)	Cardiac monitor surveillance (regime/therapy)	Patient given written advice (situation)	Urea and electrolytes (procedure)	Blood coagulation panel (procedure)	Discharge to home (procedure)
Lower back injury (disorder)	superficial injury of hand (disorder)	33	Female	2018-02-11	Referred by police (finding)	Patient given written advice (situation)	Administration of medication (procedure)	Plain radiography (procedure)	Plain radiography (procedure)	Discharge to police custody (procedure)
Upper back injury (disorder)		62	Male	2018-02-11	Self-referral to accident and emergency department (procedure)	Patient given written advice (situation)		Plain radiography (procedure)	Plain radiography (procedure)	Discharge to home (procedure)
Upper back injury (disorder)	injury of muscle of upper back (disorder)	36	Male	2018-02-11	Referred by National Health Service 111 service (finding)	Cardiac monitor surveillance (regime/therapy)	Patient given written advice (situation)			Discharge to home (procedure)
Upper back injury (disorder)	left bundle branch block (disorder)	30	Male	2018-02-11	Self-referral to accident and emergency department (procedure)	Patient given written advice (situation)				Discharge to home (procedure)
Backache (finding)		25	Male	2018-02-12	Self-referral to accident and emergency department (procedure)
Backache (finding)		64	Male	2018-02-12	Self-referral to accident and emergency department (procedure)
Backache (finding)		82	Female	2018-02-12	Referred by National Health Service 111 service (finding)					Discharge to home (procedure)
Backache (finding)	injury of muscle of lower back (disorder)	51	Female	2018-02-12	Referred by National Health Service 111 service (finding)	Patient given written advice (situation)	Cardiac monitor surveillance (regime/therapy)			Discharge to home (procedure)
Backache (finding)	lower respiratory tract infection (disorder)	83	Female	2018-02-12	Self-referral to accident and emergency department (procedure)	Patient given written advice (situation)	Cardiac monitor surveillance (regime/therapy)	Plain radiography (procedure)	Complete blood count (procedure)	Emergency department discharge to ambulatory emergency care service (procedure)
Backache (finding)	patient walked out (finding)	22	Female	2018-02-12	Referred by National Health Service 111 service (finding)	Patient given written advice (situation)				Discharge to home (procedure)
Backache (finding)	superficial injury of back (disorder)	54	Male	2018-02-12	Self-referral to accident and emergency department (procedure)	Patient given written advice (situation)				Discharge to home (procedure)
Injury of cervical region of back (disorder)	cellulitis (disorder)	75	Female	2018-02-12	Self-referral to accident and emergency department (procedure)	Oxygen therapy (procedure)	Cardiac monitor surveillance (regime/therapy)	Computerized axial tomography (procedure)	Plain radiography (procedure)	Discharge to ward (procedure)
Lower back injury (disorder)		77	Male	2018-02-12	Self-referral to accident and emergency department (procedure)	Cardiac monitor surveillance (regime/therapy)				Discharge to home (procedure)
Lower back injury (disorder)	injury of muscle of lower back (disorder)	31	Female	2018-02-12	Referred by member of Primary Health Care Team (finding)	Patient given written advice (situation)		Plain radiography (procedure)	Plain radiography (procedure)	Discharge to home (procedure)
Backache (finding)		26	Female	2018-02-13	Self-referral to accident and emergency department (procedure)					Discharge to home (procedure)
Backache (finding)	injury of muscle of lower back (disorder)	54	Female	2018-02-13	Referred by member of Primary Health Care Team (finding)	Patient given written advice (situation)		Plain radiography (procedure)	Plain radiography (procedure)	Discharge to home (procedure)
Backache (finding)	injury of muscle of lower back (disorder)	63	Male	2018-02-13	Referred by member of Primary Health Care Team (finding)	Patient given written advice (situation)		Computerized axial tomography (procedure)	Computerized axial tomography (procedure)	Discharge to home (procedure)
Backache (finding)	lower respiratory tract infection (disorder)	69	Male	2018-02-13	Self-referral to accident and emergency department (procedure)	Patient given written advice (situation)	Cardiac monitor surveillance (regime/therapy)	Complete blood count (procedure)	Urea and electrolytes (procedure)	Discharge to ward (procedure)
Backache (finding)	lumbar sprain (disorder)	29	Male	2018-02-13	Self-referral to accident and emergency department (procedure)	Patient given written advice (situation)	New medication commenced (finding)			Discharge to home (procedure)
Backache (finding)	patient walked out (finding)	33	Male	2018-02-13	Self-referral to accident and emergency department (procedure)	Patient given written advice (situation)				Discharge to home (procedure)
Backache (finding)	urinary tract infectious disease (disorder)	38	Female	2018-02-13	Self-referral to accident and emergency department (procedure)	Oxygen therapy (procedure)	Administration of medication (procedure)	Complete blood count (procedure)	Urea and electrolytes (procedure)	Discharge to ward (procedure)
Lower back injury (disorder)		24	Female	2018-02-13	Referred by National Health Service 111 service (finding)	Patient given written advice (situation)		Plain radiography (procedure)	Plain radiography (procedure)	Discharge to home (procedure)
Lower back injury (disorder)	calculus of bile duct (disorder)	19	Female	2018-02-13	Referred by National Health Service 111 service (finding)	Administration of medication (procedure)	Infusion of drug or medicament via intravenous route (procedure)	Complete blood count (procedure)	C-reactive protein measurement (procedure)	Discharge to home (procedure)
Lower back injury (disorder)	closed fracture of rib (disorder)	58	Male	2018-02-13	Self-referral to accident and emergency department (procedure)	Patient given written advice (situation)	Cardiac monitor surveillance (regime/therapy)	Plain radiography (procedure)		Discharge to home (procedure)
Lower back injury (disorder)	lumbar sprain (disorder)	50	Male	2018-02-13	Referred by member of Primary Health Care Team (finding)	Patient given written advice (situation)		Plain radiography (procedure)	Plain radiography (procedure)	Discharge to home (procedure)
Lower back injury (disorder)	patient walked out (finding)	43	Male	2018-02-13	Referred by member of Primary Health Care Team (finding)					Discharge to home (procedure)
Backache (finding)		24	Female	2018-02-14	Self-referral to accident and emergency department (procedure)					Emergency department discharge to ambulatory emergency care service (procedure)
Backache (finding)		32	Female	2018-02-14	Referred by member of Primary Health Care Team (finding)	Administration of medication (procedure)		Magnetic resonance imaging (procedure)	Magnetic resonance imaging (procedure)	Discharge to home (procedure)
Backache (finding)		57	Male	2018-02-14	Self-referral to accident and emergency department (procedure)					Emergency department discharge to ambulatory emergency care service (procedure)
Backache (finding)		75	Male	2018-02-14	Referred by member of Primary Health Care Team (finding)	Administration of medication (procedure)		Plain radiography (procedure)	Plain radiography (procedure)	Discharge to home (procedure)
Lower back injury (disorder)		22	Female	2018-02-14	Self-referral to accident and emergency department (procedure)					Discharge to home (procedure)
Lower back injury (disorder)	closed fracture pelvis, coccyx (disorder)	22	Female	2018-02-14	Referred by urgent care service (finding)	Administration of medication (procedure)				Discharge to home (procedure)
Lower back injury (disorder)	injury of muscle of lower back (disorder)	34	Male	2018-02-14	Self-referral to accident and emergency department (procedure)	Patient given written advice (situation)				Discharge to home (procedure)
Lower back injury (disorder)	injury of muscle of lower back (disorder)	39	Female	2018-02-14	Self-referral to accident and emergency department (procedure)					Discharge to home (procedure)
Lower back injury (disorder)	injury of muscle of upper arm (disorder)	47	Female	2018-02-14	Self-referral to accident and emergency department (procedure)	Patient given written advice (situation)		Plain radiography (procedure)	Plain radiography (procedure)	Discharge to home (procedure)
Lower back injury (disorder)	strain of neck muscle (disorder)	22	Male	2018-02-14	Self-referral to accident and emergency department (procedure)	Administration of medication (procedure)		Plain radiography (procedure)	Plain radiography (procedure)	Discharge to home (procedure)
Lower back injury (disorder)	superficial injury of neck (disorder)	49	Male	2018-02-14	Referred by member of Primary Health Care Team (finding)	Patient given written advice (situation)				Discharge to home (procedure)
Upper back injury (disorder)	cardiogenic shock (disorder)	60	Male	2018-02-14	Self-referral to accident and emergency department (procedure)	Administration of medication (procedure)		Glucose measurement, blood, test strip (procedure)	Urea and electrolytes (procedure)	Discharge to ward (procedure)
Backache (finding)		35	Male	2018-02-15	Referred by National Health Service 111 service (finding)	Patient given written advice (situation)				Discharge to home (procedure)
Backache (finding)	sciatica (disorder)	35	Male	2018-02-15	Self-referral to accident and emergency department (procedure)	Patient given written advice (situation)				Discharge to home (procedure)
Backache (finding)	superficial injury of back (disorder)	26	Male	2018-02-15	Self-referral to accident and emergency department (procedure)	Patient given written advice (situation)				Discharge to home (procedure)
Lower back injury (disorder)		43	Female	2018-02-15	Self-referral to accident and emergency department (procedure)	Patient given written advice (situation)				Discharge to home (procedure)
Lower back injury (disorder)		70	Male	2018-02-15	Self-referral to accident and emergency department (procedure)	Patient given written advice (situation)	Administration of medication (procedure)	Complete blood count (procedure)	Blood coagulation panel (procedure)	Discharge to home (procedure)
Lower back injury (disorder)	injury of muscle of lower back (disorder)	18	Male	2018-02-15	Self-referral to accident and emergency department (procedure)	Patient given written advice (situation)				Discharge to home (procedure)
Lower back injury (disorder)	strain of neck muscle (disorder)	47	Male	2018-02-15	Referred by National Health Service 111 service (finding)	Patient given written advice (situation)				Discharge to home (procedure)
Lower back injury (disorder)	superficial injury of back (disorder)	46	Female	2018-02-15	Referred by urgent care service (finding)	Cardiac monitor surveillance (regime/therapy)	Provision of mobility device (procedure)	Urinalysis (procedure)	Plain radiography (procedure)	Discharge to home (procedure)
Upper back injury (disorder)	conduction disorder of the heart (disorder)	73	Female	2018-02-15	Referred by National Health Service 111 service (finding)	Intravenous cannulation (procedure)	Administration of intravenous fluids (procedure)	Complete blood count (procedure)	Blood coagulation panel (procedure)	Discharge to ward (procedure)
Backache (finding)		31	Female	2018-02-16	Self-referral to accident and emergency department (procedure)					Discharge to home (procedure)
Backache (finding)		53	Female	2018-02-16	Self-referral to accident and emergency department (procedure)					Discharge to home (procedure)
Backache (finding)	injury of muscle of lower back (disorder)	32	Female	2018-02-16	Referred by hospital outpatient department (finding)	Cardiac monitor surveillance (regime/therapy)	Patient given written advice (situation)	Magnetic resonance imaging (procedure)	Magnetic resonance imaging (procedure)	Discharge to home (procedure)
Backache (finding)	injury of muscle of lower back (disorder)	33	Female	2018-02-16	Referred by National Health Service 111 service (finding)	Cardiac monitor surveillance (regime/therapy)	New medication commenced (finding)			Discharge to home (procedure)
Lower back injury (disorder)		29	Female	2018-02-16	Self-referral to accident and emergency department (procedure)	Cardiac monitor surveillance (regime/therapy)				Discharge to ward (procedure)
Lower back injury (disorder)		81	Female	2018-02-16	Referred by hospital emergency department (finding)	Cardiac monitor surveillance (regime/therapy)				Discharge to home (procedure)
Lower back injury (disorder)	lumbar sprain (disorder)	61	Female	2018-02-16	Self-referral to accident and emergency department (procedure)	Administration of medication (procedure)				Discharge to home (procedure)
Lower back injury (disorder)	neck sprain (disorder)	32	Female	2018-02-16	Referred by member of Primary Health Care Team (finding)	Patient given written advice (situation)	New medication commenced (finding)			Discharge to home (procedure)
Lower back injury (disorder)	strain of neck muscle (disorder)	25	Female	2018-02-16	Self-referral to accident and emergency department (procedure)	Cardiac monitor surveillance (regime/therapy)				Discharge to home (procedure)
Backache (finding)	sciatica (disorder)	83	Female	2018-02-17	Self-referral to accident and emergency department (procedure)	New medication commenced (finding)				Discharge to home (procedure)
Lower back injury (disorder)		22	Female	2018-02-17	Self-referral to accident and emergency department (procedure)					Discharge to home (procedure)
Lower back injury (disorder)	strain of neck muscle (disorder)	29	Female	2018-02-17	Self-referral to accident and emergency department (procedure)	Patient given written advice (situation)				Discharge to home (procedure)
Upper back injury (disorder)	injury of muscle of lower back (disorder)	86	Male	2018-02-17	Self-referral to accident and emergency department (procedure)	Patient given written advice (situation)	Cardiac monitor surveillance (regime/therapy)	Urinalysis (procedure)	Complete blood count (procedure)	Discharge to ward (procedure)
Upper back injury (disorder)	lumbar sprain (disorder)	25	Female	2018-02-17	Self-referral to accident and emergency department (procedure)	Pharmacological assessment (procedure)		Plain radiography (procedure)	Plain radiography (procedure)	Discharge to home (procedure)
Backache (finding)		42	Female	2018-02-18	Referred by National Health Service 111 service (finding)	Provision of mobility device (procedure)	Infusion of drug or medicament via intravenous route (procedure)	Urea and electrolytes (procedure)	Blood coagulation panel (procedure)	Patient transfer, to another health care facility (procedure)
Backache (finding)		51	Male	2018-02-18	Self-referral to accident and emergency department (procedure)					Discharge to home (procedure)
Backache (finding)		64	Female	2018-02-18	Self-referral to accident and emergency department (procedure)					Discharge to home (procedure)
Backache (finding)	injury of muscle of lower back (disorder)	35	Male	2018-02-18	Self-referral to accident and emergency department (procedure)	Patient given written advice (situation)	Administration of medication (procedure)			Discharge to home (procedure)
Backache (finding)	injury of muscle of lower back (disorder)	43	Female	2018-02-18	Self-referral to accident and emergency department (procedure)	New medication commenced (finding)				Discharge to home (procedure)
Backache (finding)	injury of muscle of lower back (disorder)	68	Male	2018-02-18	Self-referral to accident and emergency department (procedure)	Administration of medication (procedure)				Discharge to home (procedure)
Backache (finding)	injury of muscle of upper back (disorder)	31	Male	2018-02-18	Self-referral to accident and emergency department (procedure)	Patient given written advice (situation)				Discharge to home (procedure)
Backache (finding)	patient walked out (finding)	68	Male	2018-02-18	Self-referral to accident and emergency department (procedure)	Administration of medication (procedure)				Discharge to home (procedure)
Lower back injury (disorder)	superficial injury of back (disorder)	17	Female	2018-02-18	Self-referral to accident and emergency department (procedure)	Cardiac monitor surveillance (regime/therapy)				Discharge to home (procedure)
Lower back injury (disorder)	superficial injury of shoulder (disorder)	44	Female	2018-02-18	Self-referral to accident and emergency department (procedure)	Application of sling (procedure)		Plain radiography (procedure)	Plain radiography (procedure)	Discharge to home (procedure)
Upper back injury (disorder)		88	Female	2018-02-18	Referred by carer (finding)	Administration of medication (procedure)				Discharge to home (procedure)
Upper back injury (disorder)	lumbar sprain (disorder)	41	Female	2018-02-18	Self-referral to accident and emergency department (procedure)			Plain radiography (procedure)	Plain radiography (procedure)	Discharge to home (procedure)
Backache (finding)		28	Female	2018-02-19	Self-referral to accident and emergency department (procedure)					Discharge to home (procedure)
Backache (finding)		32	Female	2018-02-19	Self-referral to accident and emergency department (procedure)	Patient given written advice (situation)				Discharge to home (procedure)
Backache (finding)		35	Male	2018-02-19	Self-referral to accident and emergency department (procedure)					Discharge to home (procedure)
Backache (finding)		38	Female	2018-02-19	Self-referral to accident and emergency department (procedure)					Discharge to home (procedure)
Backache (finding)		42	Male	2018-02-19	Self-referral to accident and emergency department (procedure)					Discharge to home (procedure)
Backache (finding)		76	Male	2018-02-19	Self-referral to accident and emergency department (procedure)	Patient given written advice (situation)				Emergency department discharge to ambulatory emergency care service (procedure)
Backache (finding)	referral to general practitioner (procedure)	49	Female	2018-02-19	Referred by National Health Service 111 service (finding)	Patient given written advice (situation)				Emergency department discharge to ambulatory emergency care service (procedure)
Backache (finding)	sciatica (disorder)	48	Female	2018-02-19	Referred by National Health Service 111 service (finding)	Administration of medication (procedure)				Discharge to home (procedure)
Lower back injury (disorder)		23	Male	2018-02-19	Self-referral to accident and emergency department (procedure)	Administration of medication (procedure)		Plain radiography (procedure)	Plain radiography (procedure)	Discharge to home (procedure)
Lower back injury (disorder)		35	Male	2018-02-19	Self-referral to accident and emergency department (procedure)	Patient given written advice (situation)		Plain radiography (procedure)	Plain radiography (procedure)	Discharge to home (procedure)
Lower back injury (disorder)	closed fracture lumbar vertebra (disorder)	74	Female	2018-02-19	Referred by member of Primary Health Care Team (finding)	Patient given written advice (situation)		Urinalysis (procedure)	Electrocardiographic procedure (procedure)	Discharge to ward (procedure)
Lower back injury (disorder)	closed fracture lumbar vertebra (disorder)	79	Female	2018-02-19	Self-referral to accident and emergency department (procedure)	Cardiac monitor surveillance (regime/therapy)		Plain radiography (procedure)	Blood coagulation panel (procedure)	Discharge to ward (procedure)
Lower back injury (disorder)	neck sprain (disorder)	32	Male	2018-02-19	Self-referral to accident and emergency department (procedure)	Patient given written advice (situation)	New medication commenced (finding)			Discharge to home (procedure)
Lower back injury (disorder)	sciatica (disorder)	42	Female	2018-02-19	Referred by hospital emergency department (finding)	Patient given written advice (situation)	New medication commenced (finding)			Discharge to home (procedure)
Upper back injury (disorder)	injury of muscle of shoulder (disorder)	25	Female	2018-02-19	Self-referral to accident and emergency department (procedure)	Cardiac monitor surveillance (regime/therapy)	Patient given written advice (situation)			Discharge to home (procedure)
Upper back injury (disorder)	lower respiratory tract infection (disorder)	52	Male	2018-02-19	Self-referral to accident and emergency department (procedure)	Cardiac monitor surveillance (regime/therapy)	Intravenous cannulation (procedure)	Complete blood count (procedure)	Hepatic function panel (procedure)	Discharge to home (procedure)
Backache (finding)		36	Female	2018-02-20	Self-referral to accident and emergency department (procedure)					Discharge to home (procedure)
Backache (finding)		59	Female	2018-02-20	Self-referral to accident and emergency department (procedure)					Discharge to home (procedure)
Backache (finding)		73	Female	2018-02-20	Referred by hospital outpatient department (finding)			Urinalysis (procedure)	C-reactive protein measurement (procedure)	Discharge to home (procedure)
Backache (finding)	injury of muscle of upper back (disorder)	38	Female	2018-02-20	Self-referral to accident and emergency department (procedure)	Cardiac monitor surveillance (regime/therapy)	New medication commenced (finding)	Plain radiography (procedure)	Electrocardiographic procedure (procedure)	Discharge to home (procedure)
Backache (finding)	referral to general practitioner (procedure)	26	Female	2018-02-20	Self-referral to accident and emergency department (procedure)			Urinalysis (procedure)		Discharge to home (procedure)
Backache (finding)	urinary tract infectious disease (disorder)	32	Female	2018-02-20	Self-referral to accident and emergency department (procedure)	Patient given written advice (situation)	Administration of medication (procedure)	Urea and electrolytes (procedure)	Blood coagulation panel (procedure)	Discharge to home (procedure)
Backache (finding)	urinary tract infectious disease (disorder)	58	Female	2018-02-20	Self-referral to accident and emergency department (procedure)	Administration of medication (procedure)		Urinalysis (procedure)		Discharge to home (procedure)
Lower back injury (disorder)		20	Female	2018-02-20	Self-referral to accident and emergency department (procedure)					Discharge to home (procedure)
Lower back injury (disorder)		27	Female	2018-02-20	Self-referral to accident and emergency department (procedure)					Emergency department discharge to ambulatory emergency care service (procedure)
Lower back injury (disorder)	orthostatic hypotension (disorder)	84	Female	2018-02-20	Self-referral to accident and emergency department (procedure)	Intravenous cannulation (procedure)	Administration of medication (procedure)	Electrocardiographic procedure (procedure)	Urea and electrolytes (procedure)	Discharge to home (procedure)
Lower back injury (disorder)	patient walked out (finding)	17	Female	2018-02-20	Referral by out of hours service (procedure)					Discharge to home (procedure)
Upper back injury (disorder)	closed fracture lumbar vertebra (disorder)	23	Male	2018-02-20	Self-referral to accident and emergency department (procedure)	Patient given written advice (situation)		Computerized axial tomography (procedure)	Computerized axial tomography (procedure)	Discharge to home (procedure)
Backache (finding)		50	Female	2018-02-21	Self-referral to accident and emergency department (procedure)
Backache (finding)	abdominal aortic aneurysm (disorder)	71	Male	2018-02-21	Self-referral to accident and emergency department (procedure)	Cardiac monitor surveillance (regime/therapy)	Intravenous cannulation (procedure)	Urinalysis (procedure)	Urea and electrolytes (procedure)	Discharge to ward (procedure)
Backache (finding)	lumbar sprain (disorder)	30	Female	2018-02-21	Self-referral to accident and emergency department (procedure)	Patient given written advice (situation)		Urea and electrolytes (procedure)	Blood coagulation panel (procedure)	Discharge to home (procedure)
Backache (finding)	pulmonary embolism (disorder)	52	Male	2018-02-21	Self-referral to accident and emergency department (procedure)	Patient given written advice (situation)		Urea and electrolytes (procedure)	Blood coagulation panel (procedure)	Discharge to home (procedure)
Backache (finding)	referral to general practitioner (procedure)	54	Female	2018-02-21	Self-referral to accident and emergency department (procedure)					Discharge to home (procedure)
Backache (finding)	sciatica (disorder)	36	Female	2018-02-21	Self-referral to accident and emergency department (procedure)	Patient given written advice (situation)				Discharge to home (procedure)
Backache (finding)	superficial injury of back (disorder)	69	Female	2018-02-21	Self-referral to accident and emergency department (procedure)	Patient given written advice (situation)		Plain radiography (procedure)	Plain radiography (procedure)	Discharge to home (procedure)
Lower back injury (disorder)		69	Female	2018-02-21	Self-referral to accident and emergency department (procedure)					Discharge to home (procedure)
Lower back injury (disorder)		74	Female	2018-02-21	Referred by member of Primary Health Care Team (finding)	Patient given written advice (situation)		Computerized axial tomography (procedure)	Computerized axial tomography (procedure)	Discharge to home (procedure)
Lower back injury (disorder)	lumbar sprain (disorder)	75	Female	2018-02-21	Referred by member of Primary Health Care Team (finding)					Discharge to home (procedure)
Lower back injury (disorder)	patient walked out (finding)	53	Female	2018-02-21	Referred by urgent care service (finding)	Patient given written advice (situation)				Discharge to home (procedure)
Lower back injury (disorder)	patient walked out (finding)	86	Male	2018-02-21	Self-referral to accident and emergency department (procedure)	Patient given written advice (situation)				Discharge to home (procedure)
Lower back injury (disorder)	sciatica (disorder)	44	Female	2018-02-21	Self-referral to accident and emergency department (procedure)	Patient given written advice (situation)	New medication commenced (finding)			Discharge to home (procedure)
Backache (finding)		22	Male	2018-02-22	Self-referral to accident and emergency department (procedure)					Discharge to home (procedure)
Backache (finding)		23	Female	2018-02-22	Self-referral to accident and emergency department (procedure)					Discharge to home (procedure)
Backache (finding)		34	Male	2018-02-22	Self-referral to accident and emergency department (procedure)					Emergency department discharge to ambulatory emergency care service (procedure)
Backache (finding)		48	Male	2018-02-22	Referred by ambulance service (finding)	Cardiac monitor surveillance (regime/therapy)				Discharge to home (procedure)
Backache (finding)		89	Male	2018-02-22	Referred by hospital outpatient department (finding)	Administration of medication (procedure)				Discharge to home (procedure)
Backache (finding)	injury of muscle of lower back (disorder)	34	Male	2018-02-22	Self-referral to accident and emergency department (procedure)	Cardiac monitor surveillance (regime/therapy)	Administration of medication (procedure)			Discharge to home (procedure)
Backache (finding)	injury of muscle of lower back (disorder)	36	Female	2018-02-22	Referred by ambulance service (finding)	Patient given written advice (situation)	Cardiac monitor surveillance (regime/therapy)			Discharge to home (procedure)
Backache (finding)	injury of muscle of lower back (disorder)	56	Male	2018-02-22	Self-referral to accident and emergency department (procedure)	Patient given written advice (situation)				Discharge to home (procedure)
Backache (finding)	lower respiratory tract infection (disorder)	47	Female	2018-02-22	Self-referral to accident and emergency department (procedure)	Cardiac monitor surveillance (regime/therapy)	Administration of medication (procedure)	Plain radiography (procedure)	Plain radiography (procedure)	Discharge to home (procedure)
Backache (finding)	patient walked out (finding)	82	Female	2018-02-22	Self-referral to accident and emergency department (procedure)	Patient given written advice (situation)				Discharge to home (procedure)
Backache (finding)	pyelonephritis (disorder)	65	Female	2018-02-22	Referred by National Health Service 111 service (finding)	Intravenous antibiotic therapy (procedure)		Plain radiography (procedure)	Plain radiography (procedure)	Discharge to ward (procedure)
Backache (finding)	sciatica (disorder)	32	Female	2018-02-22	Referred by member of Primary Health Care Team (finding)	Patient given written advice (situation)				Discharge to home (procedure)
Lower back injury (disorder)		25	Female	2018-02-22	Referred by member of Primary Health Care Team (finding)	Cardiac monitor surveillance (regime/therapy)		Urinalysis (procedure)		Discharge to home (procedure)
Lower back injury (disorder)		58	Male	2018-02-22	Self-referral to accident and emergency department (procedure)	Administration of medication (procedure)	Cardiac monitor surveillance (regime/therapy)			Discharge to home (procedure)
Lower back injury (disorder)	closed fracture lumbar vertebra (disorder)	67	Female	2018-02-22	Self-referral to accident and emergency department (procedure)	Oxygen therapy (procedure)	Cardiac monitor surveillance (regime/therapy)	Blood coagulation panel (procedure)	C-reactive protein measurement (procedure)	Discharge to ward (procedure)
Lower back injury (disorder)	injury of muscle of lower back (disorder)	19	Female	2018-02-22	Self-referral to accident and emergency department (procedure)	Patient given written advice (situation)	Cardiac monitor surveillance (regime/therapy)	Urinalysis (procedure)	Human chorionic gonadotropin measurement (procedure)	Discharge to home (procedure)
Lower back injury (disorder)	neck sprain (disorder)	30	Female	2018-02-22	Self-referral to accident and emergency department (procedure)	Patient given written advice (situation)				Discharge to home (procedure)
Lower back injury (disorder)	sprain of hip (disorder)	40	Female	2018-02-22	Self-referral to accident and emergency department (procedure)	Administration of medication (procedure)				Discharge to home (procedure)
Lower back injury (disorder)	superficial injury of knee (disorder)	64	Male	2018-02-22	Self-referral to accident and emergency department (procedure)	Patient given written advice (situation)				Discharge to home (procedure)
Upper back injury (disorder)	superficial injury of back (disorder)	25	Female	2018-02-22	Self-referral to accident and emergency department (procedure)			Plain radiography (procedure)		Discharge to home (procedure)
Backache (finding)		29	Female	2018-02-23	Private referral (procedure)	Patient given written advice (situation)				Discharge to home (procedure)
Backache (finding)	disorder of nervous system (disorder)	66	Female	2018-02-23	Referral by out of hours service (procedure)	Patient given written advice (situation)		Complete blood count (procedure)	Hepatic function panel (procedure)	Discharge to home (procedure)
Backache (finding)	injury of muscle of lower back (disorder)	20	Female	2018-02-23	Referral by out of hours service (procedure)	Cardiac monitor surveillance (regime/therapy)	New medication commenced (finding)	Urinalysis (procedure)	Urea and electrolytes (procedure)	Discharge to home (procedure)
Backache (finding)	strain of neck muscle (disorder)	34	Male	2018-02-23	Self-referral to accident and emergency department (procedure)					Discharge to home (procedure)
Lower back injury (disorder)		48	Female	2018-02-23	Self-referral to accident and emergency department (procedure)	Administration of medication (procedure)				Discharge to home (procedure)
Lower back injury (disorder)		86	Male	2018-02-23	Referral by out of hours service (procedure)	Administration of medication (procedure)		Urinalysis (procedure)	Blood coagulation panel (procedure)	Patient transfer, to another health care facility (procedure)
Lower back injury (disorder)	lumbar sprain (disorder)	18	Male	2018-02-23	Self-referral to accident and emergency department (procedure)	Cardiac monitor surveillance (regime/therapy)	Administration of medication (procedure)			Discharge to home (procedure)
Lower back injury (disorder)	lumbar sprain (disorder)	26	Female	2018-02-23	Referred by National Health Service 111 service (finding)	Administration of medication (procedure)		Urinalysis (procedure)		Discharge to home (procedure)
Lower back injury (disorder)	patient walked out (finding)	33	Male	2018-02-23	Self-referral to accident and emergency department (procedure)	Patient given written advice (situation)				Discharge to home (procedure)
Backache (finding)		22	Female	2018-02-24	Self-referral to accident and emergency department (procedure)	Administration of medication (procedure)	Infusion of drug or medicament via intravenous route (procedure)	Complete blood count (procedure)	Erythrocyte sedimentation rate measurement (procedure)	Discharge to home (procedure)
Backache (finding)		33	Male	2018-02-24	Referred by National Health Service 111 service (finding)					Discharge to home (procedure)
Backache (finding)		51	Female	2018-02-24	Self-referral to accident and emergency department (procedure)	Patient given written advice (situation)	Cardiac monitor surveillance (regime/therapy)	Complete blood count (procedure)	Urea and electrolytes (procedure)	Discharge to home (procedure)
Backache (finding)	acute coronary syndrome (disorder)	63	Female	2018-02-24	Self-referral to accident and emergency department (procedure)	Patient given written advice (situation)		Complete blood count (procedure)	Urea and electrolytes (procedure)	Emergency department discharge to emergency department short stay ward (procedure)
Backache (finding)	ascending cholangitis (disorder)	68	Male	2018-02-24	Referred by National Health Service 111 service (finding)	Patient given written advice (situation)	Intravenous cannulation (procedure)	Complete blood count (procedure)	Blood coagulation panel (procedure)	Discharge to ward (procedure)
Backache (finding)	injury of muscle of lower back (disorder)	60	Female	2018-02-24	Self-referral to accident and emergency department (procedure)					Discharge to home (procedure)
Backache (finding)	upper gastrointestinal hemorrhage (disorder)	62	Female	2018-02-24	Referred by National Health Service 111 service (finding)	Intravenous cannulation (procedure)	Administration of intravenous fluids (procedure)	Blood coagulation panel (procedure)	C-reactive protein measurement (procedure)	Discharge to ward (procedure)
Backache (finding)	ureteric stone (disorder)	51	Female	2018-02-24	Referred by National Health Service 111 service (finding)	Patient given written advice (situation)		Urinalysis (procedure)	Human chorionic gonadotropin measurement (procedure)	Discharge to home (procedure)
Backache (finding)	urinary tract infectious disease (disorder)	85	Female	2018-02-24	Self-referral to accident and emergency department (procedure)			Urinalysis (procedure)		Discharge to home (procedure)
Injury of cervical region of back (disorder)		92	Female	2018-02-24	Self-referral to accident and emergency department (procedure)	Administration of medication (procedure)		Blood coagulation panel (procedure)	C-reactive protein measurement (procedure)	Patient transfer, to another health care facility (procedure)
Injury of cervical region of back (disorder)	injury of muscle of lower back (disorder)	41	Female	2018-02-24	Self-referral to accident and emergency department (procedure)	Patient given written advice (situation)	Administration of medication (procedure)	Plain radiography (procedure)	Plain radiography (procedure)	Discharge to home (procedure)
Lower back injury (disorder)		36	Male	2018-02-24	Referred by police (finding)					Discharge to home (procedure)
Lower back injury (disorder)		92	Female	2018-02-24	Self-referral to accident and emergency department (procedure)	Patient given written advice (situation)		Glucose measurement, blood, test strip (procedure)	Plain radiography (procedure)	Discharge to residential home (procedure)
Lower back injury (disorder)	injury of muscle of lower back (disorder)	22	Female	2018-02-24	Self-referral to accident and emergency department (procedure)	New medication commenced (finding)				Discharge to home (procedure)
Lower back injury (disorder)	lower respiratory tract infection (disorder)	73	Male	2018-02-24	Self-referral to accident and emergency department (procedure)	Cardiac monitor surveillance (regime/therapy)	Intravenous cannulation (procedure)	Urea and electrolytes (procedure)	Blood coagulation panel (procedure)	Discharge to ward (procedure)
Backache (finding)		29	Female	2018-02-25	Self-referral to accident and emergency department (procedure)	Administration of medication (procedure)		Complete blood count (procedure)	Erythrocyte sedimentation rate measurement (procedure)	Discharge to home (procedure)
Backache (finding)		80	Male	2018-02-25	Self-referral to accident and emergency department (procedure)					Discharge to home (procedure)
Backache (finding)	injury of muscle of lower back (disorder)	29	Female	2018-02-25	Referred by National Health Service 111 service (finding)	Patient given written advice (situation)				Discharge to home (procedure)
Backache (finding)	injury of muscle of lower back (disorder)	44	Male	2018-02-25	Referred by National Health Service 111 service (finding)	Administration of medication (procedure)		Urea and electrolytes (procedure)	Blood coagulation panel (procedure)	Discharge to home (procedure)
Backache (finding)	injury of muscle of lower back (disorder)	62	Male	2018-02-25	Self-referral to accident and emergency department (procedure)	Administration of medication (procedure)		Plain radiography (procedure)	Plain radiography (procedure)	Discharge to home (procedure)
Backache (finding)	injury of muscle of lower back (disorder)	90	Female	2018-02-25	Referred by National Health Service 111 service (finding)	Administration of medication (procedure)		Urinalysis (procedure)		Discharge to home (procedure)
Lower back injury (disorder)		20	Female	2018-02-25	Self-referral to accident and emergency department (procedure)	Patient given written advice (situation)	New medication commenced (finding)	Computerized axial tomography (procedure)	Computerized axial tomography (procedure)	Discharge to home (procedure)
Lower back injury (disorder)		25	Male	2018-02-25	Self-referral to accident and emergency department (procedure)	Patient given written advice (situation)				Discharge to home (procedure)
Lower back injury (disorder)	injury of muscle of lower back (disorder)	53	Male	2018-02-25	Self-referral to accident and emergency department (procedure)					Discharge to home (procedure)
Lower back injury (disorder)	injury of muscle of lower back (disorder)	88	Female	2018-02-25	Referred by hospital emergency department (finding)	Administration of medication (procedure)		Urinalysis (procedure)		Discharge to nursing home (procedure)
Lower back injury (disorder)	superficial injury of ankle (disorder)	44	Female	2018-02-25	Self-referral to accident and emergency department (procedure)	Patient given written advice (situation)		Plain radiography (procedure)	Plain radiography (procedure)	Discharge to home (procedure)
Backache (finding)		34	Female	2018-02-26	Referred by National Health Service 111 service (finding)					Discharge to home (procedure)
Backache (finding)		37	Male	2018-02-26	Self-referral to accident and emergency department (procedure)					Discharge to home (procedure)
Backache (finding)		48	Female	2018-02-26	Self-referral to accident and emergency department (procedure)					Discharge to home (procedure)
Backache (finding)		60	Female	2018-02-26	Self-referral to accident and emergency department (procedure)					Discharge to home (procedure)
Backache (finding)		84	Female	2018-02-26	Self-referral to accident and emergency department (procedure)					Emergency department discharge to ambulatory emergency care service (procedure)
Backache (finding)	injury of muscle of lower back (disorder)	31	Female	2018-02-26	Referred by member of Primary Health Care Team (finding)					Discharge to home (procedure)
Backache (finding)	injury of muscle of lower back (disorder)	45	Female	2018-02-26	Referred by ambulance service (finding)	New medication commenced (finding)				Discharge to home (procedure)
Backache (finding)	injury of muscle of lower back (disorder)	78	Male	2018-02-26	Self-referral to accident and emergency department (procedure)	Administration of medication (procedure)		Plain radiography (procedure)	Plain radiography (procedure)	Discharge to home (procedure)
Backache (finding)	patient walked out (finding)	36	Male	2018-02-26	Self-referral to accident and emergency department (procedure)	Patient given written advice (situation)				Discharge to home (procedure)
Backache (finding)	urinary tract infectious disease (disorder)	30	Female	2018-02-26	Referred by National Health Service 111 service (finding)	Patient given written advice (situation)				Discharge to home (procedure)
Lower back injury (disorder)		51	Male	2018-02-26	Self-referral to accident and emergency department (procedure)					Emergency department discharge to ambulatory emergency care service (procedure)
Lower back injury (disorder)		51	Male	2018-02-26	Self-referral to accident and emergency department (procedure)	Cardiac monitor surveillance (regime/therapy)				Discharge to home (procedure)
Lower back injury (disorder)	cholecystitis (disorder)	62	Female	2018-02-26	Referred by National Health Service 111 service (finding)	Intravenous cannulation (procedure)	New medication commenced (finding)			Discharge to home (procedure)
Lower back injury (disorder)	closed fracture of rib (disorder)	62	Male	2018-02-26	Referred by urgent care service (finding)	Cardiac monitor surveillance (regime/therapy)	Intravenous cannulation (procedure)	Blood coagulation panel (procedure)	C-reactive protein measurement (procedure)	Discharge to home (procedure)
Lower back injury (disorder)	injury of muscle of lower back (disorder)	40	Male	2018-02-26	Self-referral to accident and emergency department (procedure)	Patient given written advice (situation)				Discharge to home (procedure)
Lower back injury (disorder)	injury of muscle of lower back (disorder)	59	Male	2018-02-26	Self-referral to accident and emergency department (procedure)	Patient given written advice (situation)				Discharge to home (procedure)
Lower back injury (disorder)	lower respiratory tract infection (disorder)	82	Male	2018-02-26	Referred by carer (finding)	Patient given written advice (situation)	Administration of medication (procedure)	Complete blood count (procedure)	Urea and electrolytes (procedure)	Discharge to ward (procedure)
Lower back injury (disorder)	strain of neck muscle (disorder)	43	Male	2018-02-26	Self-referral to accident and emergency department (procedure)	Patient given written advice (situation)				Discharge to home (procedure)
Lower back injury (disorder)	superficial injury of back (disorder)	20	Male	2018-02-26	Referred by National Health Service 111 service (finding)	Patient given written advice (situation)				Discharge to home (procedure)
Upper back injury (disorder)	closed fracture of radius (disorder)	26	Male	2018-02-26	Referral by out of hours service (procedure)	Patient given written advice (situation)	Application of plaster cast (procedure)			Discharge to home (procedure)
Upper back injury (disorder)	strain of neck muscle (disorder)	37	Male	2018-02-26	Self-referral to accident and emergency department (procedure)	Patient given written advice (situation)				Discharge to home (procedure)
Backache (finding)		55	Male	2018-02-27	Self-referral to accident and emergency department (procedure)					Discharge to home (procedure)
Backache (finding)		56	Female	2018-02-27	Self-referral to accident and emergency department (procedure)					Discharge to home (procedure)
Backache (finding)		59	Male	2018-02-27	Self-referral to accident and emergency department (procedure)					Discharge to home (procedure)
Backache (finding)		67	Male	2018-02-27	Self-referral to accident and emergency department (procedure)					Discharge to home (procedure)
Backache (finding)		91	Female	2018-02-27	Referred by member of Primary Health Care Team (finding)					Emergency department discharge to ambulatory emergency care service (procedure)
Backache (finding)		91	Female	2018-02-27	Self-referral to accident and emergency department (procedure)	Patient given written advice (situation)	Administration of medication (procedure)			Discharge to ward (procedure)
Backache (finding)	cauda equina syndrome (disorder)	69	Female	2018-02-27	Self-referral to accident and emergency department (procedure)	Patient given written advice (situation)				Patient transfer, to another health care facility (procedure)
Backache (finding)	pulmonary embolism (disorder)	34	Female	2018-02-27	Self-referral to accident and emergency department (procedure)	Cardiac monitor surveillance (regime/therapy)	Intravenous cannulation (procedure)	Urinalysis (procedure)	Urea and electrolytes (procedure)	Emergency department discharge to ambulatory emergency care service (procedure)
Lower back injury (disorder)		63	Male	2018-02-27	Self-referral to accident and emergency department (procedure)	Patient given written advice (situation)		Urea and electrolytes (procedure)	Blood coagulation panel (procedure)	Discharge to home (procedure)
Lower back injury (disorder)		71	Female	2018-02-27	Referred by National Health Service 111 service (finding)					Discharge to home (procedure)
Lower back injury (disorder)	injury of muscle of lower back (disorder)	46	Male	2018-02-27	Self-referral to accident and emergency department (procedure)	New medication commenced (finding)	Patient given written advice (situation)	Plain radiography (procedure)	Plain radiography (procedure)	Discharge to home (procedure)
Lower back injury (disorder)	lumbar sprain (disorder)	38	Male	2018-02-27	Referred by member of Primary Health Care Team (finding)	Patient given written advice (situation)	Cardiac monitor surveillance (regime/therapy)	Blood coagulation panel (procedure)	C-reactive protein measurement (procedure)	Discharge to home (procedure)
Lower back injury (disorder)	lumbar sprain (disorder)	62	Female	2018-02-27	Self-referral to accident and emergency department (procedure)	Cardiac monitor surveillance (regime/therapy)	Patient given written advice (situation)	Urinalysis (procedure)	Plain radiography (procedure)	Discharge to home (procedure)
Lower back injury (disorder)	sprain of wrist (disorder)	50	Female	2018-02-27	Referred by police (finding)	Patient given written advice (situation)	Administration of medication (procedure)	Plain radiography (procedure)	Plain radiography (procedure)	Discharge to home (procedure)
Lower back injury (disorder)	strain of neck muscle (disorder)	56	Female	2018-02-27	Self-referral to accident and emergency department (procedure)					Discharge to home (procedure)
Lower back injury (disorder)	superficial injury of back (disorder)	59	Male	2018-02-27	Self-referral to accident and emergency department (procedure)			Plain radiography (procedure)	Plain radiography (procedure)	Discharge to home (procedure)
Lower back injury (disorder)	thoracic back sprain (disorder)	53	Female	2018-02-27	Referred by ambulance service (finding)	Patient given written advice (situation)	Administration of medication (procedure)	Computerized axial tomography (procedure)	Computerized axial tomography (procedure)	Discharge to home (procedure)
Backache (finding)		24	Female	2018-02-28	Self-referral to accident and emergency department (procedure)					Discharge to home (procedure)
Lower back injury (disorder)	alcohol dependence (disorder)	59	Male	2018-02-28	Referred by ambulance service (finding)	Patient given written advice (situation)		Urinalysis (procedure)	Computerized axial tomography (procedure)	Discharge to home (procedure)
Lower back injury (disorder)	injury of muscle of lower back (disorder)	21	Female	2018-02-28	Referred by National Health Service 111 service (finding)					Discharge to home (procedure)
Lower back injury (disorder)	superficial injury of hip (disorder)	46	Female	2018-02-28	Self-referral to accident and emergency department (procedure)	Cardiac monitor surveillance (regime/therapy)	Administration of medication (procedure)	Plain radiography (procedure)	Plain radiography (procedure)	Discharge to home (procedure)
Upper back injury (disorder)		19	Male	2018-02-28	Self-referral to accident and emergency department (procedure)			Urinalysis (procedure)		Discharge to home (procedure)
Upper back injury (disorder)	lumbar sprain (disorder)	20	Female	2018-02-28	Self-referral to accident and emergency department (procedure)	Patient given written advice (situation)		Plain radiography (procedure)	Plain radiography (procedure)	Discharge to home (procedure)
Backache (finding)	disorder of nervous system (disorder)	21	Male	2018-03-01	Self-referral to accident and emergency department (procedure)	Patient given written advice (situation)	Cardiac monitor surveillance (regime/therapy)	Electrocardiographic procedure (procedure)	Plain radiography (procedure)	Discharge to home (procedure)
Lower back injury (disorder)	injury of muscle of lower back (disorder)	17	Female	2018-03-01	Referral by out of hours service (procedure)	New medication commenced (finding)				Discharge to home (procedure)
Lower back injury (disorder)	sciatica (disorder)	49	Male	2018-03-01	Self-referral to accident and emergency department (procedure)					Discharge to home (procedure)
Lower back injury (disorder)	strain of neck muscle (disorder)	29	Male	2018-03-01	Referred by National Health Service 111 service (finding)	Patient given written advice (situation)				Discharge to home (procedure)
Upper back injury (disorder)	closed fracture of waist of scaphoid bone (disorder)	20	Male	2018-03-01	Self-referral to accident and emergency department (procedure)	Cardiac monitor surveillance (regime/therapy)		Plain radiography (procedure)	Plain radiography (procedure)	Discharge to home (procedure)
Upper back injury (disorder)	injury of muscle of upper back (disorder)	39	Male	2018-03-01	Self-referral to accident and emergency department (procedure)	Patient given written advice (situation)		Plain radiography (procedure)	Plain radiography (procedure)	Discharge to home (procedure)
Upper back injury (disorder)	lumbar sprain (disorder)	35	Female	2018-03-01	Self-referral to accident and emergency department (procedure)	Patient given written advice (situation)	Administration of medication (procedure)	Plain radiography (procedure)	Plain radiography (procedure)	Discharge to home (procedure)
Backache (finding)		54	Female	2018-03-02	Self-referral to accident and emergency department (procedure)	Patient given written advice (situation)				Discharge to home (procedure)
Backache (finding)		57	Male	2018-03-02	Self-referral to accident and emergency department (procedure)					Discharge to home (procedure)
Backache (finding)	disorder of cellular component of blood (disorder)	41	Male	2018-03-02	Referred by National Health Service 111 service (finding)	Patient given written advice (situation)	Intravenous cannulation (procedure)	Urinalysis (procedure)	Urea and electrolytes (procedure)	Patient transfer, to another health care facility (procedure)
Lower back injury (disorder)		37	Male	2018-03-02	Referred by National Health Service 111 service (finding)					Discharge to home (procedure)
Lower back injury (disorder)		37	Male	2018-03-02	Referred by National Health Service 111 service (finding)	Patient given written advice (situation)		Plain radiography (procedure)	Plain radiography (procedure)	Discharge to home (procedure)
Lower back injury (disorder)	injury of muscle of lower back (disorder)	31	Male	2018-03-02	Self-referral to accident and emergency department (procedure)	Patient given written advice (situation)	Administration of medication (procedure)			Discharge to home (procedure)
Lower back injury (disorder)	injury of muscle of lower back (disorder)	66	Female	2018-03-02	Self-referral to accident and emergency department (procedure)	Patient given written advice (situation)	Cardiac monitor surveillance (regime/therapy)	Blood coagulation panel (procedure)	C-reactive protein measurement (procedure)	Discharge to home (procedure)
Backache (finding)		17	Female	2018-03-03	Self-referral to accident and emergency department (procedure)					Discharge to home (procedure)
Backache (finding)		62	Female	2018-03-03	Self-referral to accident and emergency department (procedure)	Administration of medication (procedure)				Discharge to home (procedure)
Backache (finding)	constipation (disorder)	77	Male	2018-03-03	Self-referral to accident and emergency department (procedure)	Cardiac monitor surveillance (regime/therapy)	Patient given written advice (situation)	Urea and electrolytes (procedure)	Blood coagulation panel (procedure)	Discharge to home (procedure)
Backache (finding)	sciatica (disorder)	59	Male	2018-03-03	Self-referral to accident and emergency department (procedure)	New medication commenced (finding)				Discharge to home (procedure)
Lower back injury (disorder)	closed fracture carpal bone (disorder)	60	Male	2018-03-03	Self-referral to accident and emergency department (procedure)	Cardiac monitor surveillance (regime/therapy)	Application of plaster cast (procedure)	Plain radiography (procedure)	Plain radiography (procedure)	Discharge to home (procedure)
Lower back injury (disorder)	disorder of nervous system (disorder)	90	Male	2018-03-03	Self-referral to accident and emergency department (procedure)	Administration of medication (procedure)		Electrocardiographic procedure (procedure)	Plain radiography (procedure)	Discharge to ward (procedure)
Lower back injury (disorder)	injury of muscle of lower back (disorder)	29	Female	2018-03-03	Self-referral to accident and emergency department (procedure)	Administration of medication (procedure)				Discharge to home (procedure)
Lower back injury (disorder)	superficial injury of back (disorder)	27	Female	2018-03-03	Self-referral to accident and emergency department (procedure)					Discharge to home (procedure)
Backache (finding)		64	Male	2018-03-04	Referred by National Health Service 111 service (finding)	Patient given written advice (situation)				Discharge to nursing home (procedure)
Backache (finding)	lumbar sprain (disorder)	50	Female	2018-03-04	Self-referral to accident and emergency department (procedure)	New medication commenced (finding)		Plain radiography (procedure)	Plain radiography (procedure)	Discharge to home (procedure)
Backache (finding)	referral to general practitioner (procedure)	54	Female	2018-03-04	Referred by National Health Service 111 service (finding)	Patient given written advice (situation)				Discharge to home (procedure)
Backache (finding)	sciatica (disorder)	39	Female	2018-03-04	Referred by National Health Service 111 service (finding)	Patient given written advice (situation)				Discharge to home (procedure)
Backache (finding)	ureteric stone (disorder)	67	Female	2018-03-04	Self-referral to accident and emergency department (procedure)	Administration of medication (procedure)		Blood coagulation panel (procedure)	Complete blood count (procedure)	Patient transfer, to another health care facility (procedure)
Lower back injury (disorder)	injury of muscle of lower back (disorder)	19	Female	2018-03-04	Referred by National Health Service 111 service (finding)	Cardiac monitor surveillance (regime/therapy)				Discharge to home (procedure)
Lower back injury (disorder)	injury of muscle of lower back (disorder)	35	Female	2018-03-04	Self-referral to accident and emergency department (procedure)	Cardiac monitor surveillance (regime/therapy)	Patient given written advice (situation)			Discharge to home (procedure)
Lower back injury (disorder)	sciatica (disorder)	52	Female	2018-03-04	Self-referral to accident and emergency department (procedure)	Patient given written advice (situation)	New medication commenced (finding)	Urea and electrolytes (procedure)	Complete blood count (procedure)	Discharge to home (procedure)
Lower back injury (disorder)	superficial injury of back (disorder)	24	Female	2018-03-04	Self-referral to accident and emergency department (procedure)	Patient given written advice (situation)				Discharge to home (procedure)
Backache (finding)		47	Female	2018-03-05	Self-referral to accident and emergency department (procedure)	Patient given written advice (situation)				Discharge to home (procedure)
Backache (finding)		49	Male	2018-03-05	Self-referral to accident and emergency department (procedure)					Discharge to home (procedure)
Backache (finding)		55	Male	2018-03-05	Self-referral to accident and emergency department (procedure)
Backache (finding)		56	Female	2018-03-05	Self-referral to accident and emergency department (procedure)					Discharge to home (procedure)
Backache (finding)	injury of muscle of lower back (disorder)	36	Female	2018-03-05	Self-referral to accident and emergency department (procedure)	Administration of medication (procedure)	Patient given written advice (situation)			Discharge to home (procedure)
Backache (finding)	sciatica (disorder)	49	Male	2018-03-05	Self-referral to accident and emergency department (procedure)	Patient given written advice (situation)		Urea and electrolytes (procedure)		Discharge to home (procedure)
Lower back injury (disorder)		20	Male	2018-03-05	Self-referral to accident and emergency department (procedure)					Discharge to home (procedure)
Lower back injury (disorder)		31	Female	2018-03-05	Self-referral to accident and emergency department (procedure)	Patient given written advice (situation)		Urinalysis (procedure)	Human chorionic gonadotropin measurement (procedure)	Discharge to home (procedure)
Lower back injury (disorder)		42	Female	2018-03-05	Referred by National Health Service 111 service (finding)	Patient given written advice (situation)		Urinalysis (procedure)	Magnetic resonance imaging (procedure)	Patient transfer, to another health care facility (procedure)
Lower back injury (disorder)	injury of muscle of lower back (disorder)	29	Male	2018-03-05	Self-referral to accident and emergency department (procedure)	Patient given written advice (situation)	Administration of medication (procedure)			Discharge to home (procedure)
Lower back injury (disorder)	injury of muscle of lower back (disorder)	37	Female	2018-03-05	Self-referral to accident and emergency department (procedure)	Patient given written advice (situation)				Discharge to home (procedure)
Lower back injury (disorder)	open wound of head (disorder)	59	Male	2018-03-05	Self-referral to accident and emergency department (procedure)	Cardiac monitor surveillance (regime/therapy)	Administration of medication (procedure)	Plain radiography (procedure)	Plain radiography (procedure)	Discharge to home (procedure)
Lower back injury (disorder)	patient walked out (finding)	39	Male	2018-03-05	Self-referral to accident and emergency department (procedure)	Cardiac monitor surveillance (regime/therapy)				Discharge to home (procedure)
Backache (finding)		20	Male	2018-03-06	Self-referral to accident and emergency department (procedure)					Discharge to home (procedure)
Backache (finding)		40	Female	2018-03-06	Self-referral to accident and emergency department (procedure)					Discharge to home (procedure)
Backache (finding)		41	Male	2018-03-06	Self-referral to accident and emergency department (procedure)					Discharge to home (procedure)
Backache (finding)		51	Female	2018-03-06	Referred by hospital outpatient department (finding)	Patient given written advice (situation)		Blood coagulation panel (procedure)	Complete blood count (procedure)	Discharge to home (procedure)
Backache (finding)		77	Female	2018-03-06	Referred by member of Primary Health Care Team (finding)	Patient given written advice (situation)	Cardiac monitor surveillance (regime/therapy)	Urea and electrolytes (procedure)	Hepatic function panel (procedure)	Discharge to home (procedure)
Backache (finding)	cauda equina syndrome (disorder)	25	Female	2018-03-06	Referred by member of Primary Health Care Team (finding)	Patient given written advice (situation)	Cardiac monitor surveillance (regime/therapy)	Magnetic resonance imaging (procedure)	Magnetic resonance imaging (procedure)	Patient transfer, to another health care facility (procedure)
Backache (finding)	injury of muscle of lower back (disorder)	51	Female	2018-03-06	Referred by member of Primary Health Care Team (finding)	Patient given written advice (situation)	Cardiac monitor surveillance (regime/therapy)	Magnetic resonance imaging (procedure)		Discharge to home (procedure)
Backache (finding)	osteoarthritis (disorder)	30	Female	2018-03-06	Referred by member of Primary Health Care Team (finding)	Patient given written advice (situation)		Urinalysis (procedure)	Urea and electrolytes (procedure)	Discharge to home (procedure)
Lower back injury (disorder)	injury of muscle of lower back (disorder)	21	Female	2018-03-06	Self-referral to accident and emergency department (procedure)	Patient given written advice (situation)				Discharge to home (procedure)
Lower back injury (disorder)	injury of muscle of lower back (disorder)	23	Female	2018-03-06	Referred by member of Primary Health Care Team (finding)	Patient given written advice (situation)				Discharge to home (procedure)
Lower back injury (disorder)	injury of muscle of lower back (disorder)	36	Male	2018-03-06	Self-referral to accident and emergency department (procedure)	New medication commenced (finding)				Discharge to home (procedure)
[truncated: 2,132 more rows]
